# Supplementary material for: Identification of WIPI1 as A Potential Ferroptosis-Related Biomarker in Sepsis and Validation in CLP Mice Model.
Source: Research Square preprint supplement (doi:10.21203/rs.3.rs-1014586/v1), 2021-10-28
Supplement: Supplementary file 5 [file e74494feaa5d5a8e3ec00e94.xlsx]

## Sheet: Sheet1
GENE	Matrix ID	Name	Score	Relative score	Sequence ID	Start	End	Strand	Predicted sequence
GABARAPL2	MA0124.1	NKX3-1	11.5805	1	NC_000016.10:75564379-75566478	4	10	+	ATACTTA
MAPK14	MA0037.3	GATA3	12.1243	1	NC_000006.12:36025711-36027810	38	45	+	AGATAAGA
WIPI1	MA0599.1	KLF5	15.4658	1	NC_000017.11:c68459496-68457397	1874	1883	-	GCCCCGCCCC
STAT3	MA0033.2	FOXL1	11.9193	0.993649	NC_000017.11:c42390502-42388403	440	446	+	ATAAACA
GABARAPL2	MA0033.2	FOXL1	11.9193	0.993649	NC_000016.10:75564379-75566478	734	740	+	ATAAACA
STAT3	MA0058.3	MAX	13.8264	0.989507	NC_000017.11:c42390502-42388403	1578	1587	+	ACCACGTGGT
WIPI1	MA0067.1	Pax2	8.62488	0.982685	NC_000017.11:c68459496-68457397	1666	1673	+	CGTCACGC
WIPI1	MA0599.1	KLF5	13.8903	0.979957	NC_000017.11:c68459496-68457397	1923	1932	-	TCCCCACCCC
HMOX1	MA0100.3	MYB	11.7772	0.978765	NC_000022.11:35379096-35381195	1386	1395	-	TACAACTGAC
GABARAPL2	MA0027.2	EN1	10.8536	0.97742	NC_000016.10:75564379-75566478	695	702	+	CCAATTAA
TLR4	MA0488.1	JUN	16.8865	0.971633	NC_000009.12:117702403-117704502	1431	1443	+	AGAATGAGGTCAT
MAPK14	MA0036.3	GATA2	13.0451	0.971021	NC_000006.12:36025711-36027810	36	46	-	CTCTTATCTAC
MAPK14	MA0075.3	PRRX2	11.4678	0.969918	NC_000006.12:36025711-36027810	808	815	+	CCAATTAG
ATG5	MA0058.3	MAX	12.7488	0.969837	NC_000006.12:c106327789-106325690	1955	1964	-	CCCACGTGGT
WIPI1	MA0599.1	KLF5	13.0838	0.969697	NC_000017.11:c68459496-68457397	1907	1916	-	ACCCCGCCCC
STAT3	MA0033.2	FOXL1	10.4667	0.967048	NC_000017.11:c42390502-42388403	475	481	+	GTAAATA
MAPK14	MA0476.1	FOS	13.237	0.965481	NC_000006.12:36025711-36027810	86	96	-	GGTGATTCATG
WIPI1	MA0131.2	HINFP	15.4147	0.964723	NC_000017.11:c68459496-68457397	2089	2100	-	GAGCGTCCGCGG
STAT3	MA0442.2	SOX10	12.4901	0.961691	NC_000017.11:c42390502-42388403	118	128	+	GGAACAAAGCT
GABARAPL2	MA0033.2	FOXL1	10.1199	0.960697	NC_000016.10:75564379-75566478	1347	1353	-	ATAAATA
GABARAPL2	MA0037.3	GATA3	10.3524	0.959255	NC_000016.10:75564379-75566478	1566	1573	-	CGATAACA
STAT3	MA0161.2	NFIC	12.4814	0.957597	NC_000017.11:c42390502-42388403	1585	1595	-	CCCTTGGCACC
GABARAPL2	MA0028.2	ELK1	14.186	0.955522	NC_000016.10:75564379-75566478	1978	1987	+	GCCGGAAGTC
ATG7	MA0037.3	GATA3	10.1353	0.954263	NC_000003.12:11270348-11272447	628	635	+	AGATAAAA
WIPI1	MA0161.2	NFIC	12.3053	0.953472	NC_000017.11:c68459496-68457397	1298	1308	+	CGCTTGGCAAG
HMOX1	MA0137.3	STAT1	13.9692	0.95129	NC_000022.11:35379096-35381195	582	592	+	ATTCCAGGAAG
