# Supplementary material for: Identification of WIPI1 as A Potential Ferroptosis-Related Biomarker in Sepsis and Validation in CLP Mice Model.
Source: Research Square preprint supplement (doi:10.21203/rs.3.rs-1014586/v1), 2021-10-28
Supplement: Supplementary file 6 [file 302a42ec73877203ff2a1226.xlsx]

## Sheet: Sheet 1
ONTOLOGY	ID	Description	GeneRatio	BgRatio	pvalue	p.adjust	qvalue	geneID	Count
BP	GO:0034599	cellular response to oxidative stress	16/51	302/18670	6.36584e-17	8.89587e-14	5.3622e-14	CYBB/EPAS1/G6PD/HMOX1/MAP3K5/NCF2/MAPK1/MAPK8/TLR4/TNFAIP3/TXNRD1/AKR1C3/ATG7/SIRT1/FBXW7/SESN2	16
BP	GO:0006979	response to oxidative stress	18/51	451/18670	7.5134e-17	8.89587e-14	5.3622e-14	CYBB/DUSP1/EPAS1/G6PD/HMOX1/IDH1/MAP3K5/NCF2/MAPK1/MAPK8/TLR4/TNFAIP3/TXNRD1/AKR1C3/ATG7/SIRT1/FBXW7/SESN2	18
BP	GO:0042594	response to starvation	12/51	191/18670	1.04016e-13	8.21035e-11	4.94898e-11	LAMP2/MAP3K5/MAPK1/MAPK8/ZFP36/AKR1C3/ULK2/ATG7/GABARAPL2/SIRT1/WIPI1/SESN2	12
BP	GO:0031667	response to nutrient levels	16/51	499/18670	1.62026e-13	9.49798e-11	5.72513e-11	CYBB/ACSL4/G6PD/HMOX1/LAMP2/MAP3K5/MAPK1/MAPK8/ZFP36/AKR1C3/ULK2/ATG7/GABARAPL2/SIRT1/WIPI1/SESN2	16
BP	GO:0071496	cellular response to external stimulus	14/51	339/18670	2.28527e-13	9.49798e-11	5.72513e-11	CBS/CYBB/HMOX1/LAMP2/MAP3K5/MAPK1/MAPK8/TLR4/AKR1C3/ATG7/GABARAPL2/SIRT1/WIPI1/SESN2	14
BP	GO:0031668	cellular response to extracellular stimulus	13/51	268/18670	2.40658e-13	9.49798e-11	5.72513e-11	CBS/CYBB/HMOX1/LAMP2/MAP3K5/MAPK1/MAPK8/AKR1C3/ATG7/GABARAPL2/SIRT1/WIPI1/SESN2	13
BP	GO:0031669	cellular response to nutrient levels	12/51	237/18670	1.3584e-12	4.59529e-10	2.76992e-10	CYBB/HMOX1/LAMP2/MAP3K5/MAPK1/MAPK8/AKR1C3/ATG7/GABARAPL2/SIRT1/WIPI1/SESN2	12
BP	GO:0009267	cellular response to starvation	10/51	149/18670	7.46289e-12	2.20901e-09	1.33154e-09	LAMP2/MAP3K5/MAPK1/MAPK8/AKR1C3/ATG7/GABARAPL2/SIRT1/WIPI1/SESN2	10
BP	GO:0048872	homeostasis of number of cells	11/51	246/18670	4.97422e-11	1.30877e-08	7.88894e-09	ACVR1B/MAPK14/EPAS1/FLT3/G6PD/HMOX1/KRAS/STAT3/TNFAIP3/ZFP36/SLC40A1	11
BP	GO:0070997	neuron death	11/51	348/18670	1.97227e-09	4.67034e-07	2.81516e-07	ATM/BID/G6PD/HMOX1/KRAS/MAP3K5/STAT3/TLR4/ATG7/SIRT1/FBXW7	11
BP	GO:0006914	autophagy	12/51	496/18670	6.70453e-09	1.32303e-06	7.97486e-07	ATM/HMOX1/LAMP2/MAPK8/STAT3/ULK2/ATG7/GABARAPL2/SIRT1/WIPI1/FBXW7/SESN2	12
BP	GO:0061919	process utilizing autophagic mechanism	12/51	496/18670	6.70453e-09	1.32303e-06	7.97486e-07	ATM/HMOX1/LAMP2/MAPK8/STAT3/ULK2/ATG7/GABARAPL2/SIRT1/WIPI1/FBXW7/SESN2	12
BP	GO:1901214	regulation of neuron death	10/51	313/18670	1.05691e-08	1.9252e-06	1.16046e-06	ATM/G6PD/HMOX1/KRAS/MAP3K5/STAT3/TLR4/ATG7/SIRT1/FBXW7	10
BP	GO:0000302	response to reactive oxygen species	9/51	232/18670	1.1693e-08	1.97779e-06	1.19216e-06	DUSP1/HMOX1/MAP3K5/MAPK1/MAPK8/TNFAIP3/AKR1C3/SIRT1/SESN2	9
BP	GO:0034101	erythrocyte homeostasis	7/51	122/18670	3.90187e-08	6.15976e-06	3.71294e-06	ACVR1B/MAPK14/EPAS1/G6PD/HMOX1/STAT3/ZFP36	7
BP	GO:0071276	cellular response to cadmium ion	5/51	37/18670	5.07464e-08	7.51046e-06	4.52711e-06	CYBB/HMOX1/MAPK1/MAPK8/AKR1C3	5
BP	GO:0016236	macroautophagy	9/51	295/18670	9.24238e-08	1.28741e-05	7.76017e-06	HMOX1/LAMP2/MAPK8/ULK2/ATG7/GABARAPL2/SIRT1/WIPI1/SESN2	9
BP	GO:0002262	myeloid cell homeostasis	7/51	147/18670	1.40818e-07	1.85254e-05	1.11666e-05	ACVR1B/MAPK14/EPAS1/G6PD/HMOX1/STAT3/ZFP36	7
BP	GO:0010506	regulation of autophagy	9/51	327/18670	2.21406e-07	2.75942e-05	1.6633e-05	ATM/HMOX1/MAPK8/STAT3/ULK2/ATG7/SIRT1/FBXW7/SESN2	9
BP	GO:1904019	epithelial cell apoptotic process	6/51	111/18670	5.58326e-07	6.61058e-05	3.98468e-05	BID/HMOX1/MAP3K5/TNFAIP3/ZFP36/AKR1C3	6
BP	GO:0030218	erythrocyte differentiation	6/51	114/18670	6.53551e-07	7.36956e-05	4.44218e-05	ACVR1B/MAPK14/EPAS1/G6PD/STAT3/ZFP36	6
BP	GO:0046686	response to cadmium ion	5/51	63/18670	7.7572e-07	8.34957e-05	5.0329e-05	CYBB/HMOX1/MAPK1/MAPK8/AKR1C3	5
BP	GO:0072593	reactive oxygen species metabolic process	8/51	284/18670	9.38298e-07	9.66039e-05	5.82303e-05	MAPK14/CYBB/G6PD/NCF2/STAT3/TLR4/AKR1C3/SESN2	8
BP	GO:0042770	signal transduction in response to DNA damage	6/51	133/18670	1.61548e-06	0.000156241	9.41781e-05	ATM/BID/CD44/MAPK14/SIRT1/SESN2	6
BP	GO:0030099	myeloid cell differentiation	9/51	416/18670	1.64951e-06	0.000156241	9.41781e-05	ACVR1B/MAPK14/EPAS1/G6PD/STAT3/TLR4/ZFP36/SIRT1/FBXW7	9
BP	GO:0051090	regulation of DNA-binding transcription factor activity	9/51	432/18670	2.24923e-06	0.000204853	0.00012348	MAPK14/HMOX1/KRAS/MAPK1/MAPK8/STAT3/TLR4/TNFAIP3/SIRT1	9
BP	GO:0046677	response to antibiotic	8/51	327/18670	2.68767e-06	0.000235719	0.000142085	CYBB/DUSP1/G6PD/HMOX1/MAP3K5/STAT3/TNFAIP3/SIRT1	8
BP	GO:0043619	regulation of transcription from RNA polymerase II promoter in response to oxidative stress	3/51	11/18670	3.11998e-06	0.000263861	0.000159049	EPAS1/HMOX1/SESN2	3
BP	GO:0097237	cellular response to toxic substance	7/51	247/18670	4.59337e-06	0.000375073	0.000226084	CYBB/HMOX1/MAP3K5/TNFAIP3/TXNRD1/SIRT1/SESN2	7
BP	GO:0031960	response to corticosteroid	6/51	162/18670	5.07239e-06	0.000400381	0.000241339	CYBB/DUSP1/FLT3/KRAS/ZFP36/AKR1C3	6
BP	GO:0036473	cell death in response to oxidative stress	5/51	93/18670	5.39295e-06	0.000410275	0.000247303	MAP3K5/TLR4/ATG7/SIRT1/FBXW7	5
BP	GO:0034198	cellular response to amino acid starvation	4/51	43/18670	5.63331e-06	0.000410275	0.000247303	MAP3K5/MAPK1/MAPK8/SESN2	4
BP	GO:0043312	neutrophil degranulation	9/51	485/18670	5.76943e-06	0.000410275	0.000247303	ALOX5/CD44/MAPK14/CYBB/IDH1/LAMP2/MAPK1/SLC2A3/ATG7	9
BP	GO:0010038	response to metal ion	8/51	364/18670	5.92197e-06	0.000410275	0.000247303	CYBB/DUSP1/G6PD/HMOX1/MAPK1/MAPK8/AKR1C3/SLC40A1	8
BP	GO:0002283	neutrophil activation involved in immune response	9/51	488/18670	6.06403e-06	0.000410275	0.000247303	ALOX5/CD44/MAPK14/CYBB/IDH1/LAMP2/MAPK1/SLC2A3/ATG7	9
BP	GO:0034614	cellular response to reactive oxygen species	6/51	168/18670	6.25252e-06	0.000411277	0.000247907	MAP3K5/MAPK1/MAPK8/TNFAIP3/AKR1C3/SIRT1	6
BP	GO:1902882	regulation of response to oxidative stress	5/51	97/18670	6.63273e-06	0.000424495	0.000255874	TLR4/ATG7/SIRT1/FBXW7/SESN2	5
BP	GO:0042119	neutrophil activation	9/51	498/18670	7.14134e-06	0.000438321	0.000264208	ALOX5/CD44/MAPK14/CYBB/IDH1/LAMP2/MAPK1/SLC2A3/ATG7	9
BP	GO:0002446	neutrophil mediated immunity	9/51	499/18670	7.25758e-06	0.000438321	0.000264208	ALOX5/CD44/MAPK14/CYBB/IDH1/LAMP2/MAPK1/SLC2A3/ATG7	9
BP	GO:1990928	response to amino acid starvation	4/51	46/18670	7.40407e-06	0.000438321	0.000264208	MAP3K5/MAPK1/MAPK8/SESN2	4
BP	GO:0045646	regulation of erythrocyte differentiation	4/51	47/18670	8.07655e-06	0.00046647	0.000281176	ACVR1B/MAPK14/STAT3/ZFP36	4
BP	GO:0048545	response to steroid hormone	8/51	385/18670	8.91968e-06	0.0005029	0.000303135	CYBB/DUSP1/FLT3/IDH1/KRAS/ZFP36/AKR1C3/SIRT1	8
BP	GO:0008630	intrinsic apoptotic signaling pathway in response to DNA damage	5/51	104/18670	9.32966e-06	0.000513782	0.000309694	ATM/BID/CD44/HMOX1/SIRT1	5
BP	GO:0051403	stress-activated MAPK cascade	7/51	286/18670	1.19631e-05	0.000643831	0.000388085	MAPK14/DUSP1/MAP3K5/MAPK1/MAPK8/TLR4/ZFP36	7
BP	GO:0071248	cellular response to metal ion	6/51	190/18670	1.26338e-05	0.000658909	0.000397173	CYBB/HMOX1/MAPK1/MAPK8/AKR1C3/SLC40A1	6
BP	GO:0097193	intrinsic apoptotic signaling pathway	7/51	289/18670	1.27998e-05	0.000658909	0.000397173	ATM/BID/CD44/HMOX1/MAP3K5/SIRT1/FBXW7	7
BP	GO:0038066	p38MAPK cascade	4/51	53/18670	1.31003e-05	0.00066003	0.000397849	MAPK14/DUSP1/MAP3K5/ZFP36	4
BP	GO:0042035	regulation of cytokine biosynthetic process	5/51	114/18670	1.45907e-05	0.000719807	0.000433881	CYBB/HMOX1/STAT3/TLR4/ZFP36	5
BP	GO:0009896	positive regulation of catabolic process	8/51	423/18670	1.7626e-05	0.000851801	0.000513443	ATM/HMOX1/TNFAIP3/ZFP36/ATG7/SIRT1/FBXW7/SESN2	8
BP	GO:0031663	lipopolysaccharide-mediated signaling pathway	4/51	58/18670	1.87908e-05	0.000889931	0.000536427	MAPK14/MAPK1/TLR4/TNFAIP3	4
BP	GO:0071222	cellular response to lipopolysaccharide	6/51	205/18670	1.94362e-05	0.000902449	0.000543972	MAPK14/MAPK1/MAPK8/TLR4/TNFAIP3/ZFP36	6
BP	GO:0042089	cytokine biosynthetic process	5/51	123/18670	2.10822e-05	0.000960049	0.000578692	CYBB/HMOX1/STAT3/TLR4/ZFP36	5
BP	GO:0042107	cytokine metabolic process	5/51	124/18670	2.19229e-05	0.000977955	0.000589486	CYBB/HMOX1/STAT3/TLR4/ZFP36	5
BP	GO:0031098	stress-activated protein kinase signaling cascade	7/51	315/18670	2.23013e-05	0.000977955	0.000589486	MAPK14/DUSP1/MAP3K5/MAPK1/MAPK8/TLR4/ZFP36	7
BP	GO:0071219	cellular response to molecule of bacterial origin	6/51	212/18670	2.34899e-05	0.00101134	0.000609612	MAPK14/MAPK1/MAPK8/TLR4/TNFAIP3/ZFP36	6
BP	GO:0007568	aging	7/51	321/18670	2.51675e-05	0.00106422	0.000641487	ATM/MAPK14/KRAS/MAPK1/STAT3/ATG7/SIRT1	7
BP	GO:0071241	cellular response to inorganic substance	6/51	217/18670	2.67825e-05	0.00111265	0.000670674	CYBB/HMOX1/MAPK1/MAPK8/AKR1C3/SLC40A1	6
BP	GO:0071902	positive regulation of protein serine/threonine kinase activity	7/51	334/18670	3.24299e-05	0.00132404	0.000798094	MAPK14/FLT3/KRAS/MAP3K5/MAPK1/TLR4/SIRT1	7
BP	GO:0042108	positive regulation of cytokine biosynthetic process	4/51	67/18670	3.33381e-05	0.00133804	0.000806538	CYBB/HMOX1/STAT3/TLR4	4
BP	GO:0043405	regulation of MAP kinase activity	7/51	337/18670	3.43301e-05	0.0013549	0.000816695	MAPK14/DUSP1/FLT3/KRAS/MAP3K5/MAPK1/TLR4	7
BP	GO:0001101	response to acid chemical	7/51	343/18670	3.84062e-05	0.00149092	0.000898686	ATM/CYBB/DUSP1/ZEB1/AKR1C3/ATG7/SESN2	7
BP	GO:0071216	cellular response to biotic stimulus	6/51	236/18670	4.28495e-05	0.00163658	0.000986485	MAPK14/MAPK1/MAPK8/TLR4/TNFAIP3/ZFP36	6
BP	GO:0033002	muscle cell proliferation	6/51	239/18670	4.59746e-05	0.0016969	0.00102285	MAPK14/HMOX1/MAP3K5/MAPK1/STAT3/TNFAIP3	6
BP	GO:0051402	neuron apoptotic process	6/51	239/18670	4.59746e-05	0.0016969	0.00102285	ATM/BID/G6PD/HMOX1/KRAS/FBXW7	6
BP	GO:0048871	multicellular organismal homeostasis	8/51	485/18670	4.67072e-05	0.0016969	0.00102285	EPAS1/KRAS/STAT3/TLR4/TNFAIP3/LPIN1/SLC40A1/ARRDC3	8
BP	GO:1903203	regulation of oxidative stress-induced neuron death	3/51	26/18670	4.7762e-05	0.0016969	0.00102285	TLR4/ATG7/FBXW7	3
BP	GO:0042542	response to hydrogen peroxide	5/51	146/18670	4.80119e-05	0.0016969	0.00102285	DUSP1/HMOX1/MAP3K5/TNFAIP3/SIRT1	5
BP	GO:0006081	cellular aldehyde metabolic process	4/51	74/18670	4.9347e-05	0.00171844	0.00103583	G6PD/IDH1/PGD/AKR1C3	4
BP	GO:1903201	regulation of oxidative stress-induced cell death	4/51	75/18670	5.20224e-05	0.00177769	0.00107155	TLR4/ATG7/SIRT1/FBXW7	4
BP	GO:0031331	positive regulation of cellular catabolic process	7/51	361/18670	5.30917e-05	0.00177769	0.00107155	ATM/HMOX1/TNFAIP3/ZFP36/SIRT1/FBXW7/SESN2	7
BP	GO:0036475	neuron death in response to oxidative stress	3/51	27/18670	5.36288e-05	0.00177769	0.00107155	TLR4/ATG7/FBXW7	3
BP	GO:0000422	autophagy of mitochondrion	4/51	76/18670	5.48022e-05	0.00177769	0.00107155	ATG7/GABARAPL2/WIPI1/FBXW7	4
BP	GO:0061726	mitochondrion disassembly	4/51	76/18670	5.48022e-05	0.00177769	0.00107155	ATG7/GABARAPL2/WIPI1/FBXW7	4
BP	GO:0045637	regulation of myeloid cell differentiation	6/51	251/18670	6.03548e-05	0.00192455	0.00116007	ACVR1B/MAPK14/STAT3/TLR4/ZFP36/FBXW7	6
BP	GO:0035690	cellular response to drug	7/51	369/18670	6.09551e-05	0.00192455	0.00116007	CYBB/HMOX1/MAP3K5/MAPK1/TNFAIP3/ATG7/SIRT1	7
BP	GO:0043406	positive regulation of MAP kinase activity	6/51	258/18670	7.02768e-05	0.00216367	0.0013042	MAPK14/FLT3/KRAS/MAP3K5/MAPK1/TLR4	6
BP	GO:0048708	astrocyte differentiation	4/51	81/18670	7.03559e-05	0.00216367	0.0013042	KRAS/MAPK1/STAT3/TLR4	4
BP	GO:0061082	myeloid leukocyte cytokine production	3/51	30/18670	7.40097e-05	0.00224686	0.00135435	HMOX1/TLR4/SIRT1	3
BP	GO:0006631	fatty acid metabolic process	7/51	383/18670	7.70053e-05	0.00230821	0.00139133	ALOX5/MAPK14/ACSL4/AKR1C3/LPIN1/SIRT1/SESN2	7
BP	GO:0031330	negative regulation of cellular catabolic process	6/51	264/18670	7.97825e-05	0.00236156	0.00142349	MAPK14/HMOX1/STAT3/ZFP36/ATG7/GABARAPL2	6
BP	GO:0045648	positive regulation of erythrocyte differentiation	3/51	31/18670	8.17817e-05	0.0023617	0.00142357	ACVR1B/MAPK14/STAT3	3
BP	GO:1902230	negative regulation of intrinsic apoptotic signaling pathway in response to DNA damage	3/51	31/18670	8.17817e-05	0.0023617	0.00142357	BID/CD44/SIRT1	3
BP	GO:0006739	NADP metabolic process	3/51	32/18670	9.00683e-05	0.00256966	0.00154892	G6PD/IDH1/PGD	3
BP	GO:0070482	response to oxygen levels	7/51	394/18670	9.19108e-05	0.00259101	0.00156179	ATM/CYBB/DPP4/EPAS1/HMOX1/ATG7/SIRT1	7
BP	GO:1900407	regulation of cellular response to oxidative stress	4/51	88/18670	9.7233e-05	0.0026773	0.00161381	TLR4/ATG7/SIRT1/FBXW7	4
BP	GO:1904035	regulation of epithelial cell apoptotic process	4/51	88/18670	9.7233e-05	0.0026773	0.00161381	HMOX1/TNFAIP3/ZFP36/AKR1C3	4
BP	GO:0010039	response to iron ion	3/51	33/18670	9.88845e-05	0.00269148	0.00162235	G6PD/HMOX1/SLC40A1	3
BP	GO:0001659	temperature homeostasis	5/51	173/18670	0.000107275	0.00288006	0.00173602	EPAS1/STAT3/TLR4/LPIN1/ARRDC3	5
BP	GO:0043516	regulation of DNA damage response, signal transduction by p53 class mediator	3/51	34/18670	0.000108245	0.00288006	0.00173602	ATM/CD44/SIRT1	3
BP	GO:2001233	regulation of apoptotic signaling pathway	7/51	406/18670	0.000110779	0.00291471	0.00175691	BID/CD44/HMOX1/MAPK8/TNFAIP3/SIRT1/FBXW7	7
BP	GO:0000045	autophagosome assembly	4/51	93/18670	0.000120527	0.00313636	0.00189052	ULK2/ATG7/GABARAPL2/WIPI1	4
BP	GO:1901216	positive regulation of neuron death	4/51	94/18670	0.000125632	0.00323365	0.00194916	ATM/MAP3K5/TLR4/FBXW7	4
BP	GO:0071356	cellular response to tumor necrosis factor	6/51	291/18670	0.000136051	0.00343379	0.0020698	MAPK14/MAP3K5/MAPK1/TNFAIP3/ZFP36/SIRT1	6
BP	GO:1905037	autophagosome organization	4/51	96/18670	0.000136308	0.00343379	0.0020698	ULK2/ATG7/GABARAPL2/WIPI1	4
BP	GO:0005996	monosaccharide metabolic process	6/51	292/18670	0.000138618	0.00345524	0.00208273	MAPK14/G6PD/PGD/SLC2A3/SIRT1/SESN2	6
BP	GO:0046364	monosaccharide biosynthetic process	4/51	98/18670	0.000147626	0.00364144	0.00219496	G6PD/PGD/SIRT1/SESN2	4
BP	GO:0030308	negative regulation of cell growth	5/51	186/18670	0.000150675	0.00367834	0.00221721	ACVR1B/G6PD/ULK2/SIRT1/SESN2	5
BP	GO:1901570	fatty acid derivative biosynthetic process	4/51	99/18670	0.000153533	0.00370986	0.0022362	ALOX5/ACSL4/AKR1C3/SIRT1	4
BP	GO:0048608	reproductive structure development	7/51	431/18670	0.00016029	0.00380879	0.00229584	ATM/MAPK14/EPAS1/IDH1/MAPK1/AKR1C3/SIRT1	7
BP	GO:1902229	regulation of intrinsic apoptotic signaling pathway in response to DNA damage	3/51	39/18670	0.000163733	0.00380879	0.00229584	BID/CD44/SIRT1	3
BP	GO:0046545	development of primary female sexual characteristics	4/51	101/18670	0.000165858	0.00380879	0.00229584	ACVR1B/ATM/IDH1/SIRT1	4
BP	GO:1903008	organelle disassembly	4/51	101/18670	0.000165858	0.00380879	0.00229584	ATG7/GABARAPL2/WIPI1/FBXW7	4
BP	GO:0050673	epithelial cell proliferation	7/51	434/18670	0.000167278	0.00380879	0.00229584	HMOX1/MAPK1/STAT3/TNFAIP3/ZFP36/SIRT1/FBXW7	7
BP	GO:0061458	reproductive system development	7/51	434/18670	0.000167278	0.00380879	0.00229584	ATM/MAPK14/EPAS1/IDH1/MAPK1/AKR1C3/SIRT1	7
BP	GO:0002367	cytokine production involved in immune response	4/51	102/18670	0.000172281	0.00388535	0.00234199	MAPK14/HMOX1/TLR4/SIRT1	4
BP	GO:0060249	anatomical structure homeostasis	7/51	437/18670	0.000174511	0.00389851	0.00234992	ATM/EPAS1/KRAS/LAMP2/MAPK1/TLR4/TNFAIP3	7
BP	GO:0009895	negative regulation of catabolic process	6/51	308/18670	0.000185193	0.00409847	0.00247045	MAPK14/HMOX1/STAT3/ZFP36/ATG7/GABARAPL2	6
BP	GO:2000377	regulation of reactive oxygen species metabolic process	5/51	195/18670	0.000187817	0.00411805	0.00248225	MAPK14/G6PD/STAT3/TLR4/AKR1C3	5
BP	GO:0019432	triglyceride biosynthetic process	3/51	41/18670	0.00019025	0.00413313	0.00249134	ACSL4/LPIN1/FBXW7	3
BP	GO:0006641	triglyceride metabolic process	4/51	105/18670	0.00019263	0.00414681	0.00249959	ACSL4/LPIN1/SIRT1/FBXW7	4
BP	GO:0010952	positive regulation of peptidase activity	5/51	197/18670	0.000196943	0.00419848	0.00253073	BID/MAPK14/MAP3K5/STAT3/SIRT1	5
BP	GO:0034612	response to tumor necrosis factor	6/51	312/18670	0.000198577	0.00419848	0.00253073	MAPK14/MAP3K5/MAPK1/TNFAIP3/ZFP36/SIRT1	6
BP	GO:0030330	DNA damage response, signal transduction by p53 class mediator	4/51	107/18670	0.000207125	0.00434046	0.00261632	ATM/CD44/SIRT1/SESN2	4
BP	GO:0052547	regulation of peptidase activity	7/51	452/18670	0.000214587	0.00440297	0.00265399	BID/CD44/MAPK14/MAP3K5/PEBP1/STAT3/SIRT1	7
BP	GO:0070371	ERK1 and ERK2 cascade	6/51	317/18670	0.00021637	0.00440297	0.00265399	CD44/DUSP1/FLT3/MAPK1/TLR4/FBXW7	6
BP	GO:0008631	intrinsic apoptotic signaling pathway in response to oxidative stress	3/51	43/18670	0.000219405	0.00440297	0.00265399	MAP3K5/SIRT1/FBXW7	3
BP	GO:0046460	neutral lipid biosynthetic process	3/51	43/18670	0.000219405	0.00440297	0.00265399	ACSL4/LPIN1/FBXW7	3
BP	GO:0046463	acylglycerol biosynthetic process	3/51	43/18670	0.000219405	0.00440297	0.00265399	ACSL4/LPIN1/FBXW7	3
BP	GO:1903829	positive regulation of cellular protein localization	6/51	324/18670	0.000243373	0.00484291	0.00291918	BID/MAPK14/MAPK1/MAPK8/FBXW7/SESN2	6
BP	GO:0002683	negative regulation of immune system process	7/51	463/18670	0.000248469	0.00490312	0.00295547	ATM/DUSP1/HMOX1/TLR4/TNFAIP3/ZFP36/FBXW7	7
BP	GO:1901215	negative regulation of neuron death	5/51	208/18670	0.00025335	0.00495812	0.00298862	HMOX1/KRAS/STAT3/ATG7/SIRT1	5
BP	GO:0071229	cellular response to acid chemical	5/51	209/18670	0.000259028	0.00502769	0.00303056	ATM/CYBB/ZEB1/AKR1C3/SESN2	5
BP	GO:0043523	regulation of neuron apoptotic process	5/51	210/18670	0.000264803	0.00509799	0.00307294	ATM/G6PD/HMOX1/KRAS/FBXW7	5
BP	GO:0032496	response to lipopolysaccharide	6/51	330/18670	0.000268575	0.00512891	0.00309157	MAPK14/MAPK1/MAPK8/TLR4/TNFAIP3/ZFP36	6
BP	GO:0046660	female sex differentiation	4/51	115/18670	0.000273052	0.0051727	0.00311797	ACVR1B/ATM/IDH1/SIRT1	4
BP	GO:0007569	cell aging	4/51	116/18670	0.000282237	0.00530427	0.00319727	ATM/MAPK14/KRAS/SIRT1	4
BP	GO:1903706	regulation of hemopoiesis	7/51	475/18670	0.000290233	0.00541159	0.00326196	ACVR1B/MAPK14/STAT3/ZEB1/TLR4/ZFP36/FBXW7	7
BP	GO:0033210	leptin-mediated signaling pathway	2/51	10/18670	0.000324643	0.00578879	0.00348933	STAT3/SIRT1	2
BP	GO:0045348	positive regulation of MHC class II biosynthetic process	2/51	10/18670	0.000324643	0.00578879	0.00348933	TLR4/SIRT1	2
BP	GO:0070391	response to lipoteichoic acid	2/51	10/18670	0.000324643	0.00578879	0.00348933	MAPK14/TLR4	2
BP	GO:0071223	cellular response to lipoteichoic acid	2/51	10/18670	0.000324643	0.00578879	0.00348933	MAPK14/TLR4	2
BP	GO:0071281	cellular response to iron ion	2/51	10/18670	0.000324643	0.00578879	0.00348933	HMOX1/SLC40A1	2
BP	GO:0033044	regulation of chromosome organization	6/51	342/18670	0.000325131	0.00578879	0.00348933	ATM/DUSP1/MAPK1/MAPK8/SIRT1/JDP2	6
BP	GO:0002237	response to molecule of bacterial origin	6/51	343/18670	0.000330235	0.0058358	0.00351767	MAPK14/MAPK1/MAPK8/TLR4/TNFAIP3/ZFP36	6
BP	GO:0045137	development of primary sexual characteristics	5/51	223/18670	0.000349146	0.00612427	0.00369155	ACVR1B/ATM/IDH1/AKR1C3/SIRT1	5
BP	GO:0032007	negative regulation of TOR signaling	3/51	51/18670	0.000364585	0.00634808	0.00382645	ATM/SIRT1/SESN2	3
BP	GO:2001234	negative regulation of apoptotic signaling pathway	5/51	230/18670	0.000402249	0.00695275	0.00419094	BID/CD44/HMOX1/TNFAIP3/SIRT1	5
BP	GO:0001666	response to hypoxia	6/51	359/18670	0.000420832	0.00720259	0.00434153	ATM/CYBB/DPP4/EPAS1/HMOX1/SIRT1	6
BP	GO:0006639	acylglycerol metabolic process	4/51	129/18670	0.000422787	0.00720259	0.00434153	ACSL4/LPIN1/SIRT1/FBXW7	4
BP	GO:0006636	unsaturated fatty acid biosynthetic process	3/51	54/18670	0.000431749	0.00725967	0.00437594	ALOX5/AKR1C3/SIRT1	3
BP	GO:0071453	cellular response to oxygen levels	5/51	234/18670	0.000435216	0.00725967	0.00437594	CYBB/EPAS1/HMOX1/ATG7/SIRT1	5
BP	GO:0006638	neutral lipid metabolic process	4/51	130/18670	0.000435335	0.00725967	0.00437594	ACSL4/LPIN1/SIRT1/FBXW7	4
BP	GO:0045862	positive regulation of proteolysis	6/51	363/18670	0.000446263	0.00738986	0.00445441	BID/MAPK14/MAP3K5/STAT3/SIRT1/FBXW7	6
BP	GO:0046456	icosanoid biosynthetic process	3/51	55/18670	0.000455781	0.00749507	0.00451783	ALOX5/AKR1C3/SIRT1	3
BP	GO:0045598	regulation of fat cell differentiation	4/51	132/18670	0.000461226	0.00753229	0.00454027	MAPK14/ZFP36/SIRT1/JDP2	4
BP	GO:0036293	response to decreased oxygen levels	6/51	370/18670	0.000493647	0.00800655	0.00482614	ATM/CYBB/DPP4/EPAS1/HMOX1/SIRT1	6
BP	GO:0001889	liver development	4/51	135/18670	0.000502096	0.00808818	0.00487535	HMOX1/KRAS/TNFAIP3/FBXW7	4
BP	GO:0051055	negative regulation of lipid biosynthetic process	3/51	57/18670	0.000506385	0.00810216	0.00488377	AKR1C3/SIRT1/FBXW7	3
BP	GO:0034605	cellular response to heat	4/51	137/18670	0.000530737	0.00841399	0.00507174	ATM/HMOX1/MAPK1/SIRT1	4
BP	GO:1903749	positive regulation of establishment of protein localization to mitochondrion	3/51	58/18670	0.000532981	0.00841399	0.00507174	BID/MAPK8/FBXW7	3
BP	GO:0061008	hepaticobiliary system development	4/51	138/18670	0.000545485	0.00855185	0.00515483	HMOX1/KRAS/TNFAIP3/FBXW7	4
BP	GO:0050678	regulation of epithelial cell proliferation	6/51	378/18670	0.00055252	0.00855185	0.00515483	HMOX1/STAT3/TNFAIP3/ZFP36/SIRT1/FBXW7	6
BP	GO:0006995	cellular response to nitrogen starvation	2/51	13/18670	0.000559771	0.00855185	0.00515483	ATG7/GABARAPL2	2
BP	GO:0043562	cellular response to nitrogen levels	2/51	13/18670	0.000559771	0.00855185	0.00515483	ATG7/GABARAPL2	2
BP	GO:0070431	nucleotide-binding oligomerization domain containing 2 signaling pathway	2/51	13/18670	0.000559771	0.00855185	0.00515483	TLR4/TNFAIP3	2
BP	GO:0045926	negative regulation of growth	5/51	249/18670	0.000577319	0.00876341	0.00528235	ACVR1B/G6PD/ULK2/SIRT1/SESN2	5
BP	GO:0045765	regulation of angiogenesis	6/51	383/18670	0.000592006	0.00892911	0.00538224	CYBB/HMOX1/STAT3/TNFAIP3/SIRT1/FBXW7	6
BP	GO:0071384	cellular response to corticosteroid stimulus	3/51	61/18670	0.000618089	0.00911582	0.00549478	FLT3/ZFP36/AKR1C3	3
BP	GO:2001244	positive regulation of intrinsic apoptotic signaling pathway	3/51	61/18670	0.000618089	0.00911582	0.00549478	BID/SIRT1/FBXW7	3
BP	GO:0031056	regulation of histone modification	4/51	143/18670	0.000623633	0.00911582	0.00549478	ATM/MAPK8/SIRT1/JDP2	4
BP	GO:0106106	cold-induced thermogenesis	4/51	143/18670	0.000623633	0.00911582	0.00549478	EPAS1/TLR4/LPIN1/ARRDC3	4
BP	GO:0120161	regulation of cold-induced thermogenesis	4/51	143/18670	0.000623633	0.00911582	0.00549478	EPAS1/TLR4/LPIN1/ARRDC3	4
BP	GO:0045346	regulation of MHC class II biosynthetic process	2/51	14/18670	0.000651925	0.00929975	0.00560565	TLR4/SIRT1	2
BP	GO:0070672	response to interleukin-15	2/51	14/18670	0.000651925	0.00929975	0.00560565	ACSL4/STAT3	2
BP	GO:1905050	positive regulation of metallopeptidase activity	2/51	14/18670	0.000651925	0.00929975	0.00560565	MAPK14/STAT3	2
BP	GO:2000345	regulation of hepatocyte proliferation	2/51	14/18670	0.000651925	0.00929975	0.00560565	TNFAIP3/FBXW7	2
BP	GO:0051384	response to glucocorticoid	4/51	146/18670	0.000674164	0.0095594	0.00576216	DUSP1/FLT3/KRAS/ZFP36	4
BP	GO:0071236	cellular response to antibiotic	4/51	147/18670	0.000691634	0.00974875	0.00587629	CYBB/MAP3K5/TNFAIP3/SIRT1	4
BP	GO:0072577	endothelial cell apoptotic process	3/51	65/18670	0.000744417	0.0102783	0.0061955	MAP3K5/TNFAIP3/AKR1C3	3
BP	GO:0006098	pentose-phosphate shunt	2/51	15/18670	0.000750908	0.0102783	0.0061955	G6PD/PGD	2
BP	GO:0019321	pentose metabolic process	2/51	15/18670	0.000750908	0.0102783	0.0061955	G6PD/PGD	2
BP	GO:0043518	negative regulation of DNA damage response, signal transduction by p53 class mediator	2/51	15/18670	0.000750908	0.0102783	0.0061955	CD44/SIRT1	2
BP	GO:0045342	MHC class II biosynthetic process	2/51	15/18670	0.000750908	0.0102783	0.0061955	TLR4/SIRT1	2
BP	GO:0016999	antibiotic metabolic process	4/51	151/18670	0.000764735	0.0104074	0.00627333	CYBB/IDH1/STAT3/AKR1C3	4
BP	GO:0006732	coenzyme metabolic process	6/51	403/18670	0.000772422	0.010452	0.00630018	ACSL4/G6PD/IDH1/PGD/SLC2A3/STAT3	6
BP	GO:0000187	activation of MAPK activity	4/51	152/18670	0.000783832	0.0105461	0.00635691	MAPK14/MAP3K5/MAPK1/TLR4	4
BP	GO:0072331	signal transduction by p53 class mediator	5/51	267/18670	0.000790978	0.0105821	0.00637863	ATM/CD44/MAPK14/SIRT1/SESN2	5
BP	GO:1990845	adaptive thermogenesis	4/51	154/18670	0.000823033	0.0109066	0.0065742	EPAS1/TLR4/LPIN1/ARRDC3	4
BP	GO:0007548	sex differentiation	5/51	270/18670	0.000831656	0.0109066	0.0065742	ACVR1B/ATM/IDH1/AKR1C3/SIRT1	5
BP	GO:0019216	regulation of lipid metabolic process	6/51	410/18670	0.000844734	0.0109066	0.0065742	FLT3/IDH1/TXNRD1/AKR1C3/SIRT1/FBXW7	6
BP	GO:0016239	positive regulation of macroautophagy	3/51	68/18670	0.000849198	0.0109066	0.0065742	HMOX1/SIRT1/SESN2	3
BP	GO:0071230	cellular response to amino acid stimulus	3/51	68/18670	0.000849198	0.0109066	0.0065742	CYBB/ZEB1/SESN2	3
BP	GO:0010934	macrophage cytokine production	2/51	16/18670	0.000856682	0.0109066	0.0065742	TLR4/SIRT1	2
BP	GO:0061684	chaperone-mediated autophagy	2/51	16/18670	0.000856682	0.0109066	0.0065742	LAMP2/ATG7	2
BP	GO:0090335	regulation of brown fat cell differentiation	2/51	16/18670	0.000856682	0.0109066	0.0065742	MAPK14/SIRT1	2
BP	GO:1902166	negative regulation of intrinsic apoptotic signaling pathway in response to DNA damage by p53 class mediator	2/51	16/18670	0.000856682	0.0109066	0.0065742	CD44/SIRT1	2
BP	GO:0051053	negative regulation of DNA metabolic process	4/51	156/18670	0.000863601	0.0109359	0.00659186	ATM/DUSP1/ATG7/FBXW7	4
BP	GO:0061448	connective tissue development	5/51	273/18670	0.000873878	0.0110071	0.00663482	CD44/MAPK14/ZEB1/SIRT1/ARRDC3	5
BP	GO:0016054	organic acid catabolic process	5/51	275/18670	0.000902902	0.011253	0.00678302	CBS/CD44/PGD/LPIN1/SESN2	5
BP	GO:0046395	carboxylic acid catabolic process	5/51	275/18670	0.000902902	0.011253	0.00678302	CBS/CD44/PGD/LPIN1/SESN2	5
BP	GO:0032680	regulation of tumor necrosis factor production	4/51	160/18670	0.000948941	0.0117649	0.00709156	CYBB/TLR4/TNFAIP3/ZFP36	4
BP	GO:0071479	cellular response to ionizing radiation	3/51	71/18670	0.000962912	0.0118304	0.00713104	ATM/MAPK14/SIRT1	3
BP	GO:0050665	hydrogen peroxide biosynthetic process	2/51	17/18670	0.000969212	0.0118304	0.00713104	CYBB/STAT3	2
BP	GO:1903209	positive regulation of oxidative stress-induced cell death	2/51	17/18670	0.000969212	0.0118304	0.00713104	TLR4/FBXW7	2
BP	GO:0030522	intracellular receptor signaling pathway	5/51	280/18670	0.000978611	0.0118494	0.00714253	STAT3/TLR4/TNFAIP3/AKR1C3/SIRT1	5
BP	GO:1901342	regulation of vasculature development	6/51	422/18670	0.000980781	0.0118494	0.00714253	CYBB/HMOX1/STAT3/TNFAIP3/SIRT1/FBXW7	6
BP	GO:0002532	production of molecular mediator involved in inflammatory response	3/51	72/18670	0.00100285	0.0119255	0.0071884	ALOX5/MAPK14/TLR4	3
BP	GO:1903747	regulation of establishment of protein localization to mitochondrion	3/51	72/18670	0.00100285	0.0119255	0.0071884	BID/MAPK8/FBXW7	3
BP	GO:0007033	vacuole organization	4/51	163/18670	0.00101673	0.0119255	0.0071884	ULK2/ATG7/GABARAPL2/WIPI1	4
BP	GO:0032640	tumor necrosis factor production	4/51	163/18670	0.00101673	0.0119255	0.0071884	CYBB/TLR4/TNFAIP3/ZFP36	4
BP	GO:1903555	regulation of tumor necrosis factor superfamily cytokine production	4/51	163/18670	0.00101673	0.0119255	0.0071884	CYBB/TLR4/TNFAIP3/ZFP36	4
BP	GO:0052548	regulation of endopeptidase activity	6/51	425/18670	0.0010173	0.0119255	0.0071884	BID/CD44/MAP3K5/PEBP1/STAT3/SIRT1	6
BP	GO:0031647	regulation of protein stability	5/51	284/18670	0.00104251	0.0119883	0.0072262	KRAS/LAMP2/MAPK1/SIRT1/FBXW7	5
BP	GO:0031100	animal organ regeneration	3/51	73/18670	0.00104383	0.0119883	0.0072262	FLT3/HMOX1/LPIN1	3
BP	GO:2001242	regulation of intrinsic apoptotic signaling pathway	4/51	165/18670	0.00106377	0.0119883	0.0072262	BID/CD44/SIRT1/FBXW7	4
BP	GO:0051052	regulation of DNA metabolic process	6/51	429/18670	0.0010676	0.0119883	0.0072262	ATM/DUSP1/MAPK1/ATG7/SIRT1/FBXW7	6
BP	GO:0002440	production of molecular mediator of immune response	5/51	286/18670	0.00107559	0.0119883	0.0072262	ATM/MAPK14/HMOX1/TLR4/SIRT1	5
BP	GO:0044262	cellular carbohydrate metabolic process	5/51	286/18670	0.00107559	0.0119883	0.0072262	IDH1/PGD/STAT3/SIRT1/SESN2	5
BP	GO:1900182	positive regulation of protein localization to nucleus	3/51	74/18670	0.00108585	0.0119883	0.0072262	MAPK14/MAPK1/SESN2	3
BP	GO:0044320	cellular response to leptin stimulus	2/51	18/18670	0.00108846	0.0119883	0.0072262	STAT3/SIRT1	2
BP	GO:0072574	hepatocyte proliferation	2/51	18/18670	0.00108846	0.0119883	0.0072262	TNFAIP3/FBXW7	2
BP	GO:0072575	epithelial cell proliferation involved in liver morphogenesis	2/51	18/18670	0.00108846	0.0119883	0.0072262	TNFAIP3/FBXW7	2
BP	GO:1902165	regulation of intrinsic apoptotic signaling pathway in response to DNA damage by p53 class mediator	2/51	18/18670	0.00108846	0.0119883	0.0072262	CD44/SIRT1	2
BP	GO:1904262	negative regulation of TORC1 signaling	2/51	18/18670	0.00108846	0.0119883	0.0072262	ATM/SESN2	2
BP	GO:2000479	regulation of cAMP-dependent protein kinase activity	2/51	18/18670	0.00108846	0.0119883	0.0072262	SIRT1/SESN2	2
BP	GO:1901568	fatty acid derivative metabolic process	4/51	167/18670	0.00111232	0.0121943	0.00735043	ALOX5/ACSL4/AKR1C3/SIRT1	4
BP	GO:0048732	gland development	6/51	434/18670	0.00113316	0.0123524	0.00744571	ATM/HMOX1/KRAS/MAPK1/TNFAIP3/FBXW7	6
BP	GO:0071706	tumor necrosis factor superfamily cytokine production	4/51	168/18670	0.00113717	0.0123524	0.00744571	CYBB/TLR4/TNFAIP3/ZFP36	4
BP	GO:0045454	cell redox homeostasis	3/51	76/18670	0.00117306	0.0126264	0.00761089	CYBB/NCF2/TXNRD1	3
BP	GO:0046902	regulation of mitochondrial membrane permeability	3/51	76/18670	0.00117306	0.0126264	0.00761089	BID/MAPK8/STAT3	3
BP	GO:0016241	regulation of macroautophagy	4/51	171/18670	0.00121406	0.012879	0.00776311	HMOX1/MAPK8/SIRT1/SESN2	4
BP	GO:0072576	liver morphogenesis	2/51	19/18670	0.00121439	0.012879	0.00776311	TNFAIP3/FBXW7	2
BP	GO:1900409	positive regulation of cellular response to oxidative stress	2/51	19/18670	0.00121439	0.012879	0.00776311	TLR4/FBXW7	2
BP	GO:0016575	histone deacetylation	3/51	77/18670	0.00121828	0.012879	0.00776311	MAPK8/SIRT1/JDP2	3
BP	GO:0030324	lung development	4/51	172/18670	0.00124048	0.0130554	0.00786946	EPAS1/KRAS/MAPK1/FBXW7	4
BP	GO:0055021	regulation of cardiac muscle tissue growth	3/51	78/18670	0.00126459	0.0131918	0.00795167	MAPK14/G6PD/MAPK1	3
BP	GO:0090398	cellular senescence	3/51	78/18670	0.00126459	0.0131918	0.00795167	MAPK14/KRAS/SIRT1	3
BP	GO:0044282	small molecule catabolic process	6/51	445/18670	0.00128829	0.013322	0.00803018	CBS/CD44/PGD/AKR1C3/LPIN1/SESN2	6
BP	GO:2001252	positive regulation of chromosome organization	4/51	174/18670	0.00129453	0.013322	0.00803018	ATM/MAPK1/SIRT1/JDP2	4
BP	GO:0018105	peptidyl-serine phosphorylation	5/51	299/18670	0.00131007	0.013322	0.00803018	ATM/CD44/MAPK14/MAPK1/MAPK8	5
BP	GO:0055072	iron ion homeostasis	3/51	79/18670	0.00131199	0.013322	0.00803018	EPAS1/HMOX1/SLC40A1	3
BP	GO:1900034	regulation of cellular response to heat	3/51	79/18670	0.00131199	0.013322	0.00803018	ATM/MAPK1/SIRT1	3
BP	GO:0070372	regulation of ERK1 and ERK2 cascade	5/51	300/18670	0.00132955	0.013322	0.00803018	CD44/DUSP1/FLT3/TLR4/FBXW7	5
BP	GO:0009314	response to radiation	6/51	448/18670	0.00133329	0.013322	0.00803018	ATM/MAPK14/DUSP1/KRAS/MAPK8/SIRT1	6
BP	GO:0032042	mitochondrial DNA metabolic process	2/51	20/18670	0.00134697	0.013322	0.00803018	ATG7/SESN2	2
BP	GO:0032495	response to muramyl dipeptide	2/51	20/18670	0.00134697	0.013322	0.00803018	MAPK14/TNFAIP3	2
BP	GO:0042535	positive regulation of tumor necrosis factor biosynthetic process	2/51	20/18670	0.00134697	0.013322	0.00803018	CYBB/TLR4	2
BP	GO:2000774	positive regulation of cellular senescence	2/51	20/18670	0.00134697	0.013322	0.00803018	KRAS/SIRT1	2
BP	GO:0009408	response to heat	4/51	176/18670	0.00135021	0.013322	0.00803018	ATM/HMOX1/MAPK1/SIRT1	4
BP	GO:0030323	respiratory tube development	4/51	176/18670	0.00135021	0.013322	0.00803018	EPAS1/KRAS/MAPK1/FBXW7	4
BP	GO:0010950	positive regulation of endopeptidase activity	4/51	178/18670	0.00140754	0.0137413	0.00828292	BID/MAP3K5/STAT3/SIRT1	4
BP	GO:0014855	striated muscle cell proliferation	3/51	81/18670	0.00141011	0.0137413	0.00828292	MAPK14/MAPK1/STAT3	3
BP	GO:2001021	negative regulation of response to DNA damage stimulus	3/51	81/18670	0.00141011	0.0137413	0.00828292	BID/CD44/SIRT1	3
BP	GO:2001235	positive regulation of apoptotic signaling pathway	4/51	179/18670	0.00143683	0.0139443	0.00840529	BID/MAPK8/SIRT1/FBXW7	4
BP	GO:1904951	positive regulation of establishment of protein localization	6/51	456/18670	0.00145923	0.0141039	0.00850145	BID/MAPK14/MAPK1/MAPK8/TLR4/FBXW7	6
BP	GO:1901796	regulation of signal transduction by p53 class mediator	4/51	180/18670	0.00146655	0.014117	0.00850939	ATM/CD44/MAPK14/SIRT1	4
BP	GO:0017000	antibiotic biosynthetic process	2/51	21/18670	0.00148616	0.0141334	0.00851927	CYBB/STAT3	2
BP	GO:0019682	glyceraldehyde-3-phosphate metabolic process	2/51	21/18670	0.00148616	0.0141334	0.00851927	G6PD/PGD	2
BP	GO:1902884	positive regulation of response to oxidative stress	2/51	21/18670	0.00148616	0.0141334	0.00851927	TLR4/FBXW7	2
BP	GO:0051147	regulation of muscle cell differentiation	4/51	181/18670	0.0014967	0.0141767	0.00854535	MAPK14/G6PD/ZEB1/SIRT1	4
BP	GO:0010821	regulation of mitochondrion organization	4/51	182/18670	0.00152727	0.0144087	0.00868517	BID/MAPK8/ATG7/FBXW7	4
BP	GO:0002718	regulation of cytokine production involved in immune response	3/51	84/18670	0.00156576	0.0145401	0.00876438	MAPK14/HMOX1/TLR4	3
BP	GO:0010507	negative regulation of autophagy	3/51	84/18670	0.00156576	0.0145401	0.00876438	HMOX1/STAT3/ATG7	3
BP	GO:0045445	myoblast differentiation	3/51	84/18670	0.00156576	0.0145401	0.00876438	MAPK14/EPAS1/MAP3K5	3
BP	GO:0060420	regulation of heart growth	3/51	84/18670	0.00156576	0.0145401	0.00876438	MAPK14/G6PD/MAPK1	3
BP	GO:1902275	regulation of chromatin organization	4/51	185/18670	0.00162161	0.0148631	0.00895907	ATM/MAPK8/SIRT1/JDP2	4
BP	GO:0031281	positive regulation of cyclase activity	2/51	22/18670	0.00163193	0.0148631	0.00895907	MAPK14/MAPK8	2
BP	GO:0044321	response to leptin	2/51	22/18670	0.00163193	0.0148631	0.00895907	STAT3/SIRT1	2
BP	GO:0045663	positive regulation of myoblast differentiation	2/51	22/18670	0.00163193	0.0148631	0.00895907	MAPK14/MAP3K5	2
BP	GO:0070935	3'-UTR-mediated mRNA stabilization	2/51	22/18670	0.00163193	0.0148631	0.00895907	MAPK14/ZFP36	2
BP	GO:0022900	electron transport chain	4/51	186/18670	0.00165394	0.01497	0.00902353	BID/CYBB/NCF2/TXNRD1	4
BP	GO:0042326	negative regulation of phosphorylation	6/51	468/18670	0.00166497	0.01497	0.00902353	DUSP1/PEBP1/STAT3/TLR4/TNFAIP3/SIRT1	6
BP	GO:0001776	leukocyte homeostasis	3/51	86/18670	0.00167528	0.01497	0.00902353	FLT3/TNFAIP3/SLC40A1	3
BP	GO:0008625	extrinsic apoptotic signaling pathway via death domain receptors	3/51	86/18670	0.00167528	0.01497	0.00902353	BID/HMOX1/TNFAIP3	3
BP	GO:0090559	regulation of membrane permeability	3/51	86/18670	0.00167528	0.01497	0.00902353	BID/MAPK8/STAT3	3
BP	GO:0019362	pyridine nucleotide metabolic process	4/51	189/18670	0.00175361	0.0155527	0.00937473	G6PD/IDH1/PGD/STAT3	4
BP	GO:0046496	nicotinamide nucleotide metabolic process	4/51	189/18670	0.00175361	0.0155527	0.00937473	G6PD/IDH1/PGD/STAT3	4
BP	GO:0032703	negative regulation of interleukin-2 production	2/51	23/18670	0.00178423	0.0155906	0.00939762	TNFAIP3/ZFP36	2
BP	GO:0090343	positive regulation of cell aging	2/51	23/18670	0.00178423	0.0155906	0.00939762	KRAS/SIRT1	2
BP	GO:1902254	negative regulation of intrinsic apoptotic signaling pathway by p53 class mediator	2/51	23/18670	0.00178423	0.0155906	0.00939762	CD44/SIRT1	2
BP	GO:2000637	positive regulation of gene silencing by miRNA	2/51	23/18670	0.00178423	0.0155906	0.00939762	STAT3/ZFP36	2
BP	GO:0018209	peptidyl-serine modification	5/51	322/18670	0.00181487	0.0158	0.00952385	ATM/CD44/MAPK14/MAPK1/MAPK8	5
BP	GO:0007565	female pregnancy	4/51	192/18670	0.0018574	0.0160522	0.00967587	ACVR1B/ACSL4/KRAS/MAPK1	4
BP	GO:0050731	positive regulation of peptidyl-tyrosine phosphorylation	4/51	192/18670	0.0018574	0.0160522	0.00967587	CD44/FLT3/STAT3/FBXW7	4
BP	GO:1901654	response to ketone	4/51	193/18670	0.00189292	0.0162997	0.00982506	CYBB/DUSP1/AKR1C3/SIRT1	4
BP	GO:0031058	positive regulation of histone modification	3/51	90/18670	0.00190843	0.0163738	0.00986969	ATM/SIRT1/JDP2	3
BP	GO:0060148	positive regulation of posttranscriptional gene silencing	2/51	24/18670	0.00194304	0.0166105	0.0100124	STAT3/ZFP36	2
BP	GO:0072524	pyridine-containing compound metabolic process	4/51	195/18670	0.00196537	0.0166582	0.0100411	G6PD/IDH1/PGD/STAT3	4
BP	GO:0045638	negative regulation of myeloid cell differentiation	3/51	91/18670	0.00196972	0.0166582	0.0100411	TLR4/ZFP36/FBXW7	3
BP	GO:0045639	positive regulation of myeloid cell differentiation	3/51	91/18670	0.00196972	0.0166582	0.0100411	ACVR1B/MAPK14/STAT3	3
BP	GO:0071897	DNA biosynthetic process	4/51	196/18670	0.00200231	0.0168735	0.0101709	ATM/DUSP1/MAPK1/SIRT1	4
BP	GO:0045833	negative regulation of lipid metabolic process	3/51	92/18670	0.00203221	0.0170648	0.0102862	AKR1C3/SIRT1/FBXW7	3
BP	GO:0071214	cellular response to abiotic stimulus	5/51	331/18670	0.00204686	0.0170668	0.0102874	ATM/MAPK14/MAPK8/TLR4/SIRT1	5
BP	GO:0104004	cellular response to environmental stimulus	5/51	331/18670	0.00204686	0.0170668	0.0102874	ATM/MAPK14/MAPK8/TLR4/SIRT1	5
BP	GO:0046890	regulation of lipid biosynthetic process	4/51	198/18670	0.00207762	0.0172021	0.010369	IDH1/AKR1C3/SIRT1/FBXW7	4
BP	GO:0060541	respiratory system development	4/51	198/18670	0.00207762	0.0172021	0.010369	EPAS1/KRAS/MAPK1/FBXW7	4
BP	GO:0006476	protein deacetylation	3/51	93/18670	0.00209594	0.0172751	0.010413	MAPK8/SIRT1/JDP2	3
BP	GO:0051156	glucose 6-phosphate metabolic process	2/51	25/18670	0.00210832	0.0172751	0.010413	G6PD/PGD	2
BP	GO:2000104	negative regulation of DNA-dependent DNA replication	2/51	25/18670	0.00210832	0.0172751	0.010413	ATG7/FBXW7	2
BP	GO:0017038	protein import	4/51	199/18670	0.00211601	0.0172783	0.0104149	MAPK14/LAMP2/MAPK1/STAT3	4
BP	GO:1900739	regulation of protein insertion into mitochondrial membrane involved in apoptotic signaling pathway	2/51	26/18670	0.00228003	0.0182945	0.0110274	BID/MAPK8	2
BP	GO:1900740	positive regulation of protein insertion into mitochondrial membrane involved in apoptotic signaling pathway	2/51	26/18670	0.00228003	0.0182945	0.0110274	BID/MAPK8	2
BP	GO:1904353	regulation of telomere capping	2/51	26/18670	0.00228003	0.0182945	0.0110274	ATM/MAPK1	2
BP	GO:1905048	regulation of metallopeptidase activity	2/51	26/18670	0.00228003	0.0182945	0.0110274	MAPK14/STAT3	2
BP	GO:0008585	female gonad development	3/51	96/18670	0.00229453	0.0182945	0.0110274	ATM/IDH1/SIRT1	3
BP	GO:0010660	regulation of muscle cell apoptotic process	3/51	96/18670	0.00229453	0.0182945	0.0110274	HMOX1/MAP3K5/SIRT1	3
BP	GO:0048010	vascular endothelial growth factor receptor signaling pathway	3/51	96/18670	0.00229453	0.0182945	0.0110274	MAPK14/CYBB/NCF2	3
BP	GO:0002573	myeloid leukocyte differentiation	4/51	204/18670	0.00231532	0.0183367	0.0110529	MAPK14/TLR4/SIRT1/FBXW7	4
BP	GO:0045766	positive regulation of angiogenesis	4/51	204/18670	0.00231532	0.0183367	0.0110529	CYBB/HMOX1/STAT3/SIRT1	4
BP	GO:0030316	osteoclast differentiation	3/51	97/18670	0.00236323	0.0186538	0.011244	MAPK14/TLR4/FBXW7	3
BP	GO:0050679	positive regulation of epithelial cell proliferation	4/51	206/18670	0.00239855	0.0188696	0.0113741	HMOX1/STAT3/TNFAIP3/SIRT1	4
BP	GO:2001243	negative regulation of intrinsic apoptotic signaling pathway	3/51	98/18670	0.0024332	0.0190135	0.0114609	BID/CD44/SIRT1	3
BP	GO:0006733	oxidoreduction coenzyme metabolic process	4/51	207/18670	0.00244093	0.0190135	0.0114609	G6PD/IDH1/PGD/STAT3	4
BP	GO:0071456	cellular response to hypoxia	4/51	207/18670	0.00244093	0.0190135	0.0114609	CYBB/EPAS1/HMOX1/SIRT1	4
BP	GO:0045671	negative regulation of osteoclast differentiation	2/51	27/18670	0.00245814	0.0190225	0.0114663	TLR4/FBXW7	2
BP	GO:1902175	regulation of oxidative stress-induced intrinsic apoptotic signaling pathway	2/51	27/18670	0.00245814	0.0190225	0.0114663	SIRT1/FBXW7	2
BP	GO:0007623	circadian rhythm	4/51	208/18670	0.00248382	0.0191586	0.0115483	MAPK8/ATG7/SIRT1/FBXW7	4
BP	GO:0070301	cellular response to hydrogen peroxide	3/51	99/18670	0.00250444	0.0192502	0.0116035	MAP3K5/TNFAIP3/SIRT1	3
BP	GO:0048638	regulation of developmental growth	5/51	347/18670	0.00251195	0.0192502	0.0116035	MAPK14/G6PD/MAPK1/STAT3/ULK2	5
BP	GO:0006006	glucose metabolic process	4/51	209/18670	0.00252723	0.0193048	0.0116364	MAPK14/G6PD/SIRT1/SESN2	4
BP	GO:0010657	muscle cell apoptotic process	3/51	100/18670	0.00257696	0.0195585	0.0117893	HMOX1/MAP3K5/SIRT1	3
BP	GO:0055024	regulation of cardiac muscle tissue development	3/51	100/18670	0.00257696	0.0195585	0.0117893	MAPK14/G6PD/MAPK1	3
BP	GO:0001516	prostaglandin biosynthetic process	2/51	28/18670	0.00264262	0.0199291	0.0120127	AKR1C3/SIRT1	2
BP	GO:0046457	prostanoid biosynthetic process	2/51	28/18670	0.00264262	0.0199291	0.0120127	AKR1C3/SIRT1	2
BP	GO:2000379	positive regulation of reactive oxygen species metabolic process	3/51	102/18670	0.00272588	0.0204917	0.0123518	MAPK14/TLR4/AKR1C3	3
BP	GO:0016051	carbohydrate biosynthetic process	4/51	214/18670	0.00275215	0.0205586	0.0123922	G6PD/PGD/SIRT1/SESN2	4
BP	GO:2001020	regulation of response to DNA damage stimulus	4/51	214/18670	0.00275215	0.0205586	0.0123922	ATM/BID/CD44/SIRT1	4
BP	GO:0043281	regulation of cysteine-type endopeptidase activity involved in apoptotic process	4/51	215/18670	0.00279873	0.0206723	0.0124607	BID/CD44/MAP3K5/SIRT1	4
BP	GO:0070374	positive regulation of ERK1 and ERK2 cascade	4/51	215/18670	0.00279873	0.0206723	0.0124607	CD44/FLT3/TLR4/FBXW7	4
BP	GO:0035601	protein deacylation	3/51	103/18670	0.00280229	0.0206723	0.0124607	MAPK8/SIRT1/JDP2	3
BP	GO:1905269	positive regulation of chromatin organization	3/51	103/18670	0.00280229	0.0206723	0.0124607	ATM/SIRT1/JDP2	3
BP	GO:0031063	regulation of histone deacetylation	2/51	29/18670	0.00283343	0.0208371	0.0125601	MAPK8/JDP2	2
BP	GO:0098732	macromolecule deacylation	3/51	104/18670	0.00288001	0.0210178	0.012669	MAPK8/SIRT1/JDP2	3
BP	GO:0008406	gonad development	4/51	217/18670	0.0028935	0.0210178	0.012669	ATM/IDH1/AKR1C3/SIRT1	4
BP	GO:0036294	cellular response to decreased oxygen levels	4/51	217/18670	0.0028935	0.0210178	0.012669	CYBB/EPAS1/HMOX1/SIRT1	4
BP	GO:0044242	cellular lipid catabolic process	4/51	217/18670	0.0028935	0.0210178	0.012669	IDH1/AKR1C3/LPIN1/SESN2	4
BP	GO:0010001	glial cell differentiation	4/51	218/18670	0.00294171	0.0212979	0.0128378	KRAS/MAPK1/STAT3/TLR4	4
BP	GO:0032006	regulation of TOR signaling	3/51	105/18670	0.00295905	0.0212979	0.0128378	ATM/SIRT1/SESN2	3
BP	GO:0055017	cardiac muscle tissue growth	3/51	105/18670	0.00295905	0.0212979	0.0128378	MAPK14/G6PD/MAPK1	3
BP	GO:0007584	response to nutrient	4/51	219/18670	0.00299046	0.0214588	0.0129348	CYBB/ACSL4/HMOX1/AKR1C3	4
BP	GO:0000002	mitochondrial genome maintenance	2/51	30/18670	0.00303053	0.0215504	0.01299	ATG7/SESN2	2
BP	GO:0001844	protein insertion into mitochondrial membrane involved in apoptotic signaling pathway	2/51	30/18670	0.00303053	0.0215504	0.01299	BID/MAPK8	2
BP	GO:0050869	negative regulation of B cell activation	2/51	30/18670	0.00303053	0.0215504	0.01299	ATM/TNFAIP3	2
BP	GO:0062014	negative regulation of small molecule metabolic process	3/51	107/18670	0.00312112	0.0221281	0.0133383	STAT3/AKR1C3/SIRT1	3
BP	GO:0044706	multi-multicellular organism process	4/51	222/18670	0.00314003	0.0221958	0.0133791	ACVR1B/ACSL4/KRAS/MAPK1	4
BP	GO:0045444	fat cell differentiation	4/51	223/18670	0.00319101	0.0224481	0.0135311	MAPK14/ZFP36/SIRT1/JDP2	4
BP	GO:1904659	glucose transmembrane transport	3/51	108/18670	0.00320416	0.0224481	0.0135311	MAPK14/SLC2A3/SESN2	3
BP	GO:2000278	regulation of DNA biosynthetic process	3/51	108/18670	0.00320416	0.0224481	0.0135311	ATM/DUSP1/MAPK1	3
BP	GO:1902253	regulation of intrinsic apoptotic signaling pathway by p53 class mediator	2/51	31/18670	0.00323389	0.0225834	0.0136127	CD44/SIRT1	2
BP	GO:0097191	extrinsic apoptotic signaling pathway	4/51	224/18670	0.00324255	0.0225834	0.0136127	ACVR1B/BID/HMOX1/TNFAIP3	4
BP	GO:0001676	long-chain fatty acid metabolic process	3/51	109/18670	0.00328855	0.0228366	0.0137653	ALOX5/ACSL4/AKR1C3	3
BP	GO:0033559	unsaturated fatty acid metabolic process	3/51	110/18670	0.00337429	0.0233635	0.0140829	ALOX5/AKR1C3/SIRT1	3
BP	GO:0001894	tissue homeostasis	4/51	227/18670	0.00340057	0.0234769	0.0141512	EPAS1/KRAS/TLR4/TNFAIP3	4
BP	GO:0051385	response to mineralocorticoid	2/51	32/18670	0.00344348	0.0237039	0.0142881	CYBB/KRAS	2
BP	GO:0001938	positive regulation of endothelial cell proliferation	3/51	112/18670	0.00354987	0.0242251	0.0146022	HMOX1/STAT3/SIRT1	3
BP	GO:0008645	hexose transmembrane transport	3/51	112/18670	0.00354987	0.0242251	0.0146022	MAPK14/SLC2A3/SESN2	3
BP	GO:0060419	heart growth	3/51	112/18670	0.00354987	0.0242251	0.0146022	MAPK14/G6PD/MAPK1	3
BP	GO:1904018	positive regulation of vasculature development	4/51	230/18670	0.00356378	0.0242501	0.0146173	CYBB/HMOX1/STAT3/SIRT1	4
BP	GO:0043200	response to amino acid	3/51	113/18670	0.00363972	0.0245471	0.0147963	CYBB/ZEB1/SESN2	3
BP	GO:0046620	regulation of organ growth	3/51	113/18670	0.00363972	0.0245471	0.0147963	MAPK14/G6PD/MAPK1	3
BP	GO:0051204	protein insertion into mitochondrial membrane	2/51	33/18670	0.00365926	0.0245471	0.0147963	BID/MAPK8	2
BP	GO:0051443	positive regulation of ubiquitin-protein transferase activity	2/51	33/18670	0.00365926	0.0245471	0.0147963	FBXW7/ARRDC3	2
BP	GO:1901797	negative regulation of signal transduction by p53 class mediator	2/51	33/18670	0.00365926	0.0245471	0.0147963	CD44/SIRT1	2
BP	GO:0006690	icosanoid metabolic process	3/51	114/18670	0.00373096	0.0247562	0.0149224	ALOX5/AKR1C3/SIRT1	3
BP	GO:0015749	monosaccharide transmembrane transport	3/51	114/18670	0.00373096	0.0247562	0.0149224	MAPK14/SLC2A3/SESN2	3
BP	GO:0042752	regulation of circadian rhythm	3/51	114/18670	0.00373096	0.0247562	0.0149224	MAPK8/ATG7/FBXW7	3
BP	GO:0097305	response to alcohol	4/51	233/18670	0.00373225	0.0247562	0.0149224	CYBB/G6PD/STAT3/AKR1C3	4
BP	GO:0046777	protein autophosphorylation	4/51	235/18670	0.00384753	0.0251799	0.0151778	ACVR1B/ATM/FLT3/ULK2	4
BP	GO:0007094	mitotic spindle assembly checkpoint	2/51	34/18670	0.0038812	0.0251799	0.0151778	ATM/DUSP1	2
BP	GO:0031577	spindle checkpoint	2/51	34/18670	0.0038812	0.0251799	0.0151778	ATM/DUSP1	2
BP	GO:0032212	positive regulation of telomere maintenance via telomerase	2/51	34/18670	0.0038812	0.0251799	0.0151778	ATM/MAPK1	2
BP	GO:0042533	tumor necrosis factor biosynthetic process	2/51	34/18670	0.0038812	0.0251799	0.0151778	CYBB/TLR4	2
BP	GO:0042534	regulation of tumor necrosis factor biosynthetic process	2/51	34/18670	0.0038812	0.0251799	0.0151778	CYBB/TLR4	2
BP	GO:0071173	spindle assembly checkpoint	2/51	34/18670	0.0038812	0.0251799	0.0151778	ATM/DUSP1	2
BP	GO:0071174	mitotic spindle checkpoint	2/51	34/18670	0.0038812	0.0251799	0.0151778	ATM/DUSP1	2
BP	GO:0034219	carbohydrate transmembrane transport	3/51	116/18670	0.0039176	0.0252207	0.0152024	MAPK14/SLC2A3/SESN2	3
BP	GO:1900180	regulation of protein localization to nucleus	3/51	116/18670	0.0039176	0.0252207	0.0152024	MAPK14/MAPK1/SESN2	3
BP	GO:0042692	muscle cell differentiation	5/51	385/18670	0.00391944	0.0252207	0.0152024	MAPK14/G6PD/KRAS/ZEB1/SIRT1	5
BP	GO:0032872	regulation of stress-activated MAPK cascade	4/51	237/18670	0.0039652	0.0253773	0.0152968	DUSP1/MAP3K5/MAPK1/TLR4	4
BP	GO:0043122	regulation of I-kappaB kinase/NF-kappaB signaling	4/51	237/18670	0.0039652	0.0253773	0.0152968	HMOX1/TLR4/TNFAIP3/SIRT1	4
BP	GO:0010508	positive regulation of autophagy	3/51	117/18670	0.00401302	0.0255452	0.015398	HMOX1/SIRT1/SESN2	3
BP	GO:0010822	positive regulation of mitochondrion organization	3/51	117/18670	0.00401302	0.0255452	0.015398	BID/MAPK8/FBXW7	3
BP	GO:0070302	regulation of stress-activated protein kinase signaling cascade	4/51	239/18670	0.0040853	0.0257427	0.015517	DUSP1/MAP3K5/MAPK1/TLR4	4
BP	GO:2000116	regulation of cysteine-type endopeptidase activity	4/51	239/18670	0.0040853	0.0257427	0.015517	BID/CD44/MAP3K5/SIRT1	4
BP	GO:0032735	positive regulation of interleukin-12 production	2/51	35/18670	0.00410926	0.0257427	0.015517	MAPK14/TLR4	2
BP	GO:0034142	toll-like receptor 4 signaling pathway	2/51	35/18670	0.00410926	0.0257427	0.015517	TLR4/TNFAIP3	2
BP	GO:0070423	nucleotide-binding oligomerization domain containing signaling pathway	2/51	35/18670	0.00410926	0.0257427	0.015517	TLR4/TNFAIP3	2
BP	GO:1901030	positive regulation of mitochondrial outer membrane permeabilization involved in apoptotic signaling pathway	2/51	35/18670	0.00410926	0.0257427	0.015517	BID/MAPK8	2
BP	GO:0009266	response to temperature stimulus	4/51	243/18670	0.00433285	0.0269246	0.0162294	ATM/HMOX1/MAPK1/SIRT1	4
BP	GO:0035872	nucleotide-binding domain, leucine rich repeat containing receptor signaling pathway	2/51	36/18670	0.00434341	0.0269246	0.0162294	TLR4/TNFAIP3	2
BP	GO:0042554	superoxide anion generation	2/51	36/18670	0.00434341	0.0269246	0.0162294	CYBB/NCF2	2
BP	GO:0045841	negative regulation of mitotic metaphase/anaphase transition	2/51	36/18670	0.00434341	0.0269246	0.0162294	ATM/DUSP1	2
BP	GO:0010639	negative regulation of organelle organization	5/51	395/18670	0.00436851	0.0270095	0.0162806	ATM/CAPG/DUSP1/ATG7/SIRT1	5
BP	GO:0043618	regulation of transcription from RNA polymerase II promoter in response to stress	3/51	121/18670	0.00440884	0.0271879	0.0163881	EPAS1/HMOX1/SESN2	3
BP	GO:1903409	reactive oxygen species biosynthetic process	3/51	122/18670	0.00451137	0.0277478	0.0167257	CYBB/STAT3/TLR4	3
BP	GO:0042307	positive regulation of protein import into nucleus	2/51	37/18670	0.00458362	0.0278308	0.0167757	MAPK14/MAPK1	2
BP	GO:0045730	respiratory burst	2/51	37/18670	0.00458362	0.0278308	0.0167757	CYBB/NCF2	2
BP	GO:1902100	negative regulation of metaphase/anaphase transition of cell cycle	2/51	37/18670	0.00458362	0.0278308	0.0167757	ATM/DUSP1	2
BP	GO:1903432	regulation of TORC1 signaling	2/51	37/18670	0.00458362	0.0278308	0.0167757	ATM/SESN2	2
BP	GO:1904358	positive regulation of telomere maintenance via telomere lengthening	2/51	37/18670	0.00458362	0.0278308	0.0167757	ATM/MAPK1	2
BP	GO:0014066	regulation of phosphatidylinositol 3-kinase signaling	3/51	124/18670	0.00472074	0.0284577	0.0171536	FLT3/MAPK1/SIRT1	3
BP	GO:0051101	regulation of DNA binding	3/51	124/18670	0.00472074	0.0284577	0.0171536	HMOX1/MAPK8/FBXW7	3
BP	GO:0019318	hexose metabolic process	4/51	249/18670	0.00472292	0.0284577	0.0171536	MAPK14/G6PD/SIRT1/SESN2	4
BP	GO:0071383	cellular response to steroid hormone stimulus	4/51	250/18670	0.00479016	0.0286644	0.0172781	FLT3/ZFP36/AKR1C3/SIRT1	4
BP	GO:0031929	TOR signaling	3/51	125/18670	0.0048276	0.0286644	0.0172781	ATM/SIRT1/SESN2	3
BP	GO:0045471	response to ethanol	3/51	125/18670	0.0048276	0.0286644	0.0172781	CYBB/G6PD/STAT3	3
BP	GO:0015804	neutral amino acid transport	2/51	38/18670	0.00482985	0.0286644	0.0172781	SLC7A5/SLC38A1	2
BP	GO:0060045	positive regulation of cardiac muscle cell proliferation	2/51	38/18670	0.00482985	0.0286644	0.0172781	MAPK14/MAPK1	2
BP	GO:0097352	autophagosome maturation	2/51	38/18670	0.00482985	0.0286644	0.0172781	LAMP2/GABARAPL2	2
BP	GO:0045017	glycerolipid biosynthetic process	4/51	251/18670	0.00485804	0.0287596	0.0173355	ATM/ACSL4/LPIN1/FBXW7	4
BP	GO:0018107	peptidyl-threonine phosphorylation	3/51	126/18670	0.00493591	0.0291477	0.0175695	ACVR1B/MAPK1/MAPK8	3
BP	GO:0043620	regulation of DNA-templated transcription in response to stress	3/51	127/18670	0.00504569	0.029496	0.0177794	EPAS1/HMOX1/SESN2	3
BP	GO:0033574	response to testosterone	2/51	39/18670	0.00508208	0.029496	0.0177794	DUSP1/SIRT1	2
BP	GO:0055090	acylglycerol homeostasis	2/51	39/18670	0.00508208	0.029496	0.0177794	SIRT1/SESN2	2
BP	GO:0070328	triglyceride homeostasis	2/51	39/18670	0.00508208	0.029496	0.0177794	SIRT1/SESN2	2
BP	GO:1902042	negative regulation of extrinsic apoptotic signaling pathway via death domain receptors	2/51	39/18670	0.00508208	0.029496	0.0177794	HMOX1/TNFAIP3	2
BP	GO:1904591	positive regulation of protein import	2/51	39/18670	0.00508208	0.029496	0.0177794	MAPK14/MAPK1	2
BP	GO:2000816	negative regulation of mitotic sister chromatid separation	2/51	39/18670	0.00508208	0.029496	0.0177794	ATM/DUSP1	2
BP	GO:0006839	mitochondrial transport	4/51	256/18670	0.00520718	0.0300746	0.0181282	BID/MAPK8/STAT3/FBXW7	4
BP	GO:0050730	regulation of peptidyl-tyrosine phosphorylation	4/51	256/18670	0.00520718	0.0300746	0.0181282	CD44/FLT3/STAT3/FBXW7	4
BP	GO:0046486	glycerolipid metabolic process	5/51	414/18670	0.00532146	0.0306192	0.0184564	ATM/ACSL4/LPIN1/SIRT1/FBXW7	5
BP	GO:0008156	negative regulation of DNA replication	2/51	40/18670	0.00534026	0.0306192	0.0184564	ATG7/FBXW7	2
BP	GO:1905819	negative regulation of chromosome separation	2/51	40/18670	0.00534026	0.0306192	0.0184564	ATM/DUSP1	2
BP	GO:0042157	lipoprotein metabolic process	3/51	130/18670	0.00538385	0.0307946	0.0185622	ATM/ATG7/WIPI1	3
BP	GO:0001558	regulation of cell growth	5/51	416/18670	0.0054297	0.030982	0.0186751	ACVR1B/G6PD/ULK2/SIRT1/SESN2	5
BP	GO:0055076	transition metal ion homeostasis	3/51	131/18670	0.00549953	0.031305	0.0188698	EPAS1/HMOX1/SLC40A1	3
BP	GO:0034122	negative regulation of toll-like receptor signaling pathway	2/51	41/18670	0.00560436	0.0316675	0.0190883	TLR4/TNFAIP3	2
BP	GO:0050873	brown fat cell differentiation	2/51	41/18670	0.00560436	0.0316675	0.0190883	MAPK14/SIRT1	2
BP	GO:0043280	positive regulation of cysteine-type endopeptidase activity involved in apoptotic process	3/51	132/18670	0.0056167	0.0316675	0.0190883	BID/MAP3K5/SIRT1	3
BP	GO:0072329	monocarboxylic acid catabolic process	3/51	132/18670	0.0056167	0.0316675	0.0190883	PGD/LPIN1/SESN2	3
BP	GO:0034504	protein localization to nucleus	4/51	262/18670	0.00564795	0.031768	0.0191489	MAPK14/MAPK1/STAT3/SESN2	4
BP	GO:0007006	mitochondrial membrane organization	3/51	134/18670	0.00585552	0.0327799	0.0197588	BID/MAPK8/STAT3	3
BP	GO:0018210	peptidyl-threonine modification	3/51	134/18670	0.00585552	0.0327799	0.0197588	ACVR1B/MAPK1/MAPK8	3
BP	GO:0033048	negative regulation of mitotic sister chromatid segregation	2/51	42/18670	0.00587435	0.0328077	0.0197756	ATM/DUSP1	2
BP	GO:0006692	prostanoid metabolic process	2/51	43/18670	0.0061502	0.033948	0.020463	AKR1C3/SIRT1	2
BP	GO:0006693	prostaglandin metabolic process	2/51	43/18670	0.0061502	0.033948	0.020463	AKR1C3/SIRT1	2
BP	GO:0031279	regulation of cyclase activity	2/51	43/18670	0.0061502	0.033948	0.020463	MAPK14/MAPK8	2
BP	GO:0038202	TORC1 signaling	2/51	43/18670	0.0061502	0.033948	0.020463	ATM/SESN2	2
BP	GO:0060612	adipose tissue development	2/51	43/18670	0.0061502	0.033948	0.020463	SIRT1/ARRDC3	2
BP	GO:0001933	negative regulation of protein phosphorylation	5/51	429/18670	0.00617173	0.0339876	0.0204868	DUSP1/PEBP1/TLR4/TNFAIP3/SIRT1	5
BP	GO:0007249	I-kappaB kinase/NF-kappaB signaling	4/51	269/18670	0.00619299	0.0340255	0.0205097	HMOX1/TLR4/TNFAIP3/SIRT1	4
BP	GO:0072655	establishment of protein localization to mitochondrion	3/51	137/18670	0.00622507	0.0341226	0.0205682	BID/MAPK8/FBXW7	3
BP	GO:0014002	astrocyte development	2/51	44/18670	0.00643188	0.0349328	0.0210566	KRAS/TLR4	2
BP	GO:0033046	negative regulation of sister chromatid segregation	2/51	44/18670	0.00643188	0.0349328	0.0210566	ATM/DUSP1	2
BP	GO:0090311	regulation of protein deacetylation	2/51	44/18670	0.00643188	0.0349328	0.0210566	MAPK8/JDP2	2
BP	GO:1901028	regulation of mitochondrial outer membrane permeabilization involved in apoptotic signaling pathway	2/51	44/18670	0.00643188	0.0349328	0.0210566	BID/MAPK8	2
BP	GO:0002700	regulation of production of molecular mediator of immune response	3/51	139/18670	0.00647902	0.0351083	0.0211623	MAPK14/HMOX1/TLR4	3
BP	GO:0043542	endothelial cell migration	4/51	273/18670	0.00651967	0.0352479	0.0212465	DPP4/HMOX1/SIRT1/FBXW7	4
BP	GO:0043434	response to peptide hormone	5/51	436/18670	0.00659968	0.0355992	0.0214582	CYBB/STAT3/LPIN1/SIRT1/SESN2	5
BP	GO:0042771	intrinsic apoptotic signaling pathway in response to DNA damage by p53 class mediator	2/51	45/18670	0.00671935	0.0359174	0.0216501	CD44/SIRT1	2
BP	GO:0048255	mRNA stabilization	2/51	45/18670	0.00671935	0.0359174	0.0216501	MAPK14/ZFP36	2
BP	GO:0048538	thymus development	2/51	45/18670	0.00671935	0.0359174	0.0216501	ATM/MAPK1	2
BP	GO:0051985	negative regulation of chromosome segregation	2/51	45/18670	0.00671935	0.0359174	0.0216501	ATM/DUSP1	2
BP	GO:0070585	protein localization to mitochondrion	3/51	141/18670	0.00673908	0.0359418	0.0216648	BID/MAPK8/FBXW7	3
BP	GO:0010675	regulation of cellular carbohydrate metabolic process	3/51	142/18670	0.00687142	0.0365652	0.0220406	STAT3/SIRT1/SESN2	3
BP	GO:0006606	protein import into nucleus	3/51	143/18670	0.0070053	0.0366574	0.0220961	MAPK14/MAPK1/STAT3	3
BP	GO:0044344	cellular response to fibroblast growth factor stimulus	3/51	143/18670	0.0070053	0.0366574	0.0220961	CD44/MAPK1/ZFP36	3
BP	GO:0010883	regulation of lipid storage	2/51	46/18670	0.00701258	0.0366574	0.0220961	SIRT1/FBXW7	2
BP	GO:0031648	protein destabilization	2/51	46/18670	0.00701258	0.0366574	0.0220961	SIRT1/FBXW7	2
BP	GO:0050706	regulation of interleukin-1 beta secretion	2/51	46/18670	0.00701258	0.0366574	0.0220961	TLR4/TNFAIP3	2
BP	GO:0071675	regulation of mononuclear cell migration	2/51	46/18670	0.00701258	0.0366574	0.0220961	MAPK14/DUSP1	2
BP	GO:1900015	regulation of cytokine production involved in inflammatory response	2/51	46/18670	0.00701258	0.0366574	0.0220961	MAPK14/TLR4	2
BP	GO:1904036	negative regulation of epithelial cell apoptotic process	2/51	46/18670	0.00701258	0.0366574	0.0220961	HMOX1/TNFAIP3	2
BP	GO:0071901	negative regulation of protein serine/threonine kinase activity	3/51	145/18670	0.00727771	0.0378856	0.0228364	DUSP1/TNFAIP3/SIRT1	3
BP	GO:0070849	response to epidermal growth factor	2/51	47/18670	0.00731153	0.0378856	0.0228364	MAPK1/ZFP36	2
BP	GO:0120163	negative regulation of cold-induced thermogenesis	2/51	47/18670	0.00731153	0.0378856	0.0228364	TLR4/ARRDC3	2
BP	GO:1900744	regulation of p38MAPK cascade	2/51	47/18670	0.00731153	0.0378856	0.0228364	DUSP1/MAP3K5	2
BP	GO:2001251	negative regulation of chromosome organization	3/51	146/18670	0.00741625	0.0383443	0.0231129	ATM/DUSP1/SIRT1	3
BP	GO:0010212	response to ionizing radiation	3/51	147/18670	0.00755634	0.038702	0.0233285	ATM/MAPK14/SIRT1	3
BP	GO:0034976	response to endoplasmic reticulum stress	4/51	285/18670	0.0075681	0.038702	0.0233285	MAP3K5/SIRT1/WIPI1/SESN2	4
BP	GO:0051348	negative regulation of transferase activity	4/51	285/18670	0.0075681	0.038702	0.0233285	DUSP1/TNFAIP3/ZFP36/SIRT1	4
BP	GO:0002762	negative regulation of myeloid leukocyte differentiation	2/51	48/18670	0.00761618	0.038702	0.0233285	TLR4/FBXW7	2
BP	GO:0006111	regulation of gluconeogenesis	2/51	48/18670	0.00761618	0.038702	0.0233285	SIRT1/SESN2	2
BP	GO:0051150	regulation of smooth muscle cell differentiation	2/51	48/18670	0.00761618	0.038702	0.0233285	ZEB1/SIRT1	2
BP	GO:0055023	positive regulation of cardiac muscle tissue growth	2/51	48/18670	0.00761618	0.038702	0.0233285	MAPK14/MAPK1	2
BP	GO:0072666	establishment of protein localization to vacuole	2/51	48/18670	0.00761618	0.038702	0.0233285	LAMP2/TNFAIP3	2
BP	GO:0008643	carbohydrate transport	3/51	148/18670	0.007698	0.0389506	0.0234784	MAPK14/SLC2A3/SESN2	3
BP	GO:0014065	phosphatidylinositol 3-kinase signaling	3/51	148/18670	0.007698	0.0389506	0.0234784	FLT3/MAPK1/SIRT1	3
BP	GO:0051092	positive regulation of NF-kappaB transcription factor activity	3/51	149/18670	0.00784123	0.0394327	0.023769	KRAS/STAT3/TLR4	3
BP	GO:2001056	positive regulation of cysteine-type endopeptidase activity	3/51	149/18670	0.00784123	0.0394327	0.023769	BID/MAP3K5/SIRT1	3
BP	GO:0002534	cytokine production involved in inflammatory response	2/51	49/18670	0.0079265	0.0394327	0.023769	MAPK14/TLR4	2
BP	GO:0002686	negative regulation of leukocyte migration	2/51	49/18670	0.0079265	0.0394327	0.023769	DUSP1/HMOX1	2
BP	GO:0035094	response to nicotine	2/51	49/18670	0.0079265	0.0394327	0.023769	HMOX1/MAPK1	2
BP	GO:0043124	negative regulation of I-kappaB kinase/NF-kappaB signaling	2/51	49/18670	0.0079265	0.0394327	0.023769	TNFAIP3/SIRT1	2
BP	GO:0051205	protein insertion into membrane	2/51	49/18670	0.0079265	0.0394327	0.023769	BID/MAPK8	2
BP	GO:0097300	programmed necrotic cell death	2/51	49/18670	0.0079265	0.0394327	0.023769	MAP3K5/TLR4	2
BP	GO:0071774	response to fibroblast growth factor	3/51	150/18670	0.00798603	0.0396455	0.0238973	CD44/MAPK1/ZFP36	3
BP	GO:0042063	gliogenesis	4/51	290/18670	0.00803596	0.03981	0.0239964	KRAS/MAPK1/STAT3/TLR4	4
BP	GO:0055088	lipid homeostasis	3/51	151/18670	0.00813241	0.0402036	0.0242337	SIRT1/FBXW7/SESN2	3
BP	GO:0043489	RNA stabilization	2/51	50/18670	0.00824244	0.0405122	0.0244197	MAPK14/ZFP36	2
BP	GO:0060425	lung morphogenesis	2/51	50/18670	0.00824244	0.0405122	0.0244197	KRAS/MAPK1	2
BP	GO:0001890	placenta development	3/51	152/18670	0.00828037	0.0405122	0.0244197	MAPK14/EPAS1/MAPK1	3
BP	GO:0016202	regulation of striated muscle tissue development	3/51	152/18670	0.00828037	0.0405122	0.0244197	MAPK14/G6PD/MAPK1	3
BP	GO:0032675	regulation of interleukin-6 production	3/51	152/18670	0.00828037	0.0405122	0.0244197	STAT3/TLR4/TNFAIP3	3
BP	GO:0001667	ameboidal-type cell migration	5/51	461/18670	0.00829902	0.0405197	0.0244242	ACVR1B/DPP4/HMOX1/SIRT1/FBXW7	5
BP	GO:0046394	carboxylic acid biosynthetic process	5/51	462/18670	0.00837275	0.0407956	0.0245905	ALOX5/CBS/STAT3/AKR1C3/SIRT1	5
BP	GO:0090316	positive regulation of intracellular protein transport	3/51	153/18670	0.00842991	0.0409885	0.0247068	MAPK14/MAPK1/FBXW7	3
BP	GO:0016053	organic acid biosynthetic process	5/51	463/18670	0.00844694	0.0409885	0.0247068	ALOX5/CBS/STAT3/AKR1C3/SIRT1	5
BP	GO:0001819	positive regulation of cytokine production	5/51	464/18670	0.00852159	0.0411349	0.0247951	MAPK14/CYBB/HMOX1/STAT3/TLR4	5
BP	GO:0048511	rhythmic process	4/51	295/18670	0.00852253	0.0411349	0.0247951	MAPK8/ATG7/SIRT1/FBXW7	4
BP	GO:0030071	regulation of mitotic metaphase/anaphase transition	2/51	51/18670	0.00856399	0.0411349	0.0247951	ATM/DUSP1	2
BP	GO:0032206	positive regulation of telomere maintenance	2/51	51/18670	0.00856399	0.0411349	0.0247951	ATM/MAPK1	2
BP	GO:0045599	negative regulation of fat cell differentiation	2/51	51/18670	0.00856399	0.0411349	0.0247951	SIRT1/JDP2	2
BP	GO:0001818	negative regulation of cytokine production	4/51	296/18670	0.00862212	0.0413303	0.0249128	HMOX1/TLR4/TNFAIP3/ZFP36	4
BP	GO:0060968	regulation of gene silencing	3/51	155/18670	0.00873376	0.0414451	0.024982	STAT3/ZFP36/SIRT1	3
BP	GO:1901861	regulation of muscle tissue development	3/51	155/18670	0.00873376	0.0414451	0.024982	MAPK14/G6PD/MAPK1	3
BP	GO:1903707	negative regulation of hemopoiesis	3/51	155/18670	0.00873376	0.0414451	0.024982	TLR4/ZFP36/FBXW7	3
BP	GO:2001236	regulation of extrinsic apoptotic signaling pathway	3/51	155/18670	0.00873376	0.0414451	0.024982	BID/HMOX1/TNFAIP3	3
BP	GO:0044843	cell cycle G1/S phase transition	4/51	298/18670	0.00882358	0.0414451	0.024982	ACVR1B/ATM/BID/FBXW7	4
BP	GO:0070661	leukocyte proliferation	4/51	298/18670	0.00882358	0.0414451	0.024982	ATM/FLT3/TLR4/TNFAIP3	4
BP	GO:0030856	regulation of epithelial cell differentiation	3/51	156/18670	0.00888808	0.0414451	0.024982	MAFG/ZEB1/ZFP36	3
BP	GO:0043535	regulation of blood vessel endothelial cell migration	3/51	156/18670	0.00888808	0.0414451	0.024982	HMOX1/SIRT1/FBXW7	3
BP	GO:0048634	regulation of muscle organ development	3/51	156/18670	0.00888808	0.0414451	0.024982	MAPK14/G6PD/MAPK1	3
BP	GO:0045839	negative regulation of mitotic nuclear division	2/51	52/18670	0.0088911	0.0414451	0.024982	ATM/DUSP1	2
BP	GO:0051438	regulation of ubiquitin-protein transferase activity	2/51	52/18670	0.0088911	0.0414451	0.024982	FBXW7/ARRDC3	2
BP	GO:0060421	positive regulation of heart growth	2/51	52/18670	0.0088911	0.0414451	0.024982	MAPK14/MAPK1	2
BP	GO:1902373	negative regulation of mRNA catabolic process	2/51	52/18670	0.0088911	0.0414451	0.024982	MAPK14/ZFP36	2
BP	GO:2000772	regulation of cellular senescence	2/51	52/18670	0.0088911	0.0414451	0.024982	KRAS/SIRT1	2
BP	GO:0000186	activation of MAPKK activity	2/51	53/18670	0.00922375	0.0424113	0.0255645	MAP3K5/MAPK1	2
BP	GO:0032715	negative regulation of interleukin-6 production	2/51	53/18670	0.00922375	0.0424113	0.0255645	TLR4/TNFAIP3	2
BP	GO:0045661	regulation of myoblast differentiation	2/51	53/18670	0.00922375	0.0424113	0.0255645	MAPK14/MAP3K5	2
BP	GO:0050702	interleukin-1 beta secretion	2/51	53/18670	0.00922375	0.0424113	0.0255645	TLR4/TNFAIP3	2
BP	GO:0050704	regulation of interleukin-1 secretion	2/51	53/18670	0.00922375	0.0424113	0.0255645	TLR4/TNFAIP3	2
BP	GO:1902099	regulation of metaphase/anaphase transition of cell cycle	2/51	53/18670	0.00922375	0.0424113	0.0255645	ATM/DUSP1	2
BP	GO:1902475	L-alpha-amino acid transmembrane transport	2/51	53/18670	0.00922375	0.0424113	0.0255645	SLC7A5/SLC38A1	2
BP	GO:0002720	positive regulation of cytokine production involved in immune response	2/51	54/18670	0.00956191	0.0432937	0.0260963	MAPK14/TLR4	2
BP	GO:0007091	metaphase/anaphase transition of mitotic cell cycle	2/51	54/18670	0.00956191	0.0432937	0.0260963	ATM/DUSP1	2
BP	GO:0032210	regulation of telomere maintenance via telomerase	2/51	54/18670	0.00956191	0.0432937	0.0260963	ATM/MAPK1	2
BP	GO:0032655	regulation of interleukin-12 production	2/51	54/18670	0.00956191	0.0432937	0.0260963	MAPK14/TLR4	2
BP	GO:0032663	regulation of interleukin-2 production	2/51	54/18670	0.00956191	0.0432937	0.0260963	TNFAIP3/ZFP36	2
BP	GO:0043392	negative regulation of DNA binding	2/51	54/18670	0.00956191	0.0432937	0.0260963	HMOX1/FBXW7	2
BP	GO:0090329	regulation of DNA-dependent DNA replication	2/51	54/18670	0.00956191	0.0432937	0.0260963	ATG7/FBXW7	2
BP	GO:0097345	mitochondrial outer membrane permeabilization	2/51	54/18670	0.00956191	0.0432937	0.0260963	BID/MAPK8	2
BP	GO:0032635	interleukin-6 production	3/51	161/18670	0.00968371	0.0437615	0.0263783	STAT3/TLR4/TNFAIP3	3
BP	GO:0016233	telomere capping	2/51	55/18670	0.00990553	0.0445091	0.0268289	ATM/MAPK1	2
BP	GO:0042306	regulation of protein import into nucleus	2/51	55/18670	0.00990553	0.0445091	0.0268289	MAPK14/MAPK1	2
BP	GO:0043030	regulation of macrophage activation	2/51	55/18670	0.00990553	0.0445091	0.0268289	ATM/TLR4	2
BP	GO:0051170	import into nucleus	3/51	163/18670	0.0100133	0.0449079	0.0270693	MAPK14/MAPK1/STAT3	3
BP	GO:0042113	B cell activation	4/51	310/18670	0.0100974	0.0451832	0.0272353	ATM/FLT3/TLR4/TNFAIP3	4
BP	GO:0016049	cell growth	5/51	484/18670	0.0101128	0.0451832	0.0272353	ACVR1B/G6PD/ULK2/SIRT1/SESN2	5
BP	GO:0006633	fatty acid biosynthetic process	3/51	164/18670	0.0101805	0.0453039	0.027308	ALOX5/AKR1C3/SIRT1	3
BP	GO:0051249	regulation of lymphocyte activation	5/51	485/18670	0.0101974	0.0453039	0.027308	ATM/DPP4/ZEB1/TLR4/TNFAIP3	5
BP	GO:0006749	glutathione metabolic process	2/51	56/18670	0.0102546	0.0453039	0.027308	G6PD/IDH1	2
BP	GO:0032615	interleukin-12 production	2/51	56/18670	0.0102546	0.0453039	0.027308	MAPK14/TLR4	2
BP	GO:0044784	metaphase/anaphase transition of cell cycle	2/51	56/18670	0.0102546	0.0453039	0.027308	ATM/DUSP1	2
BP	GO:1903202	negative regulation of oxidative stress-induced cell death	2/51	56/18670	0.0102546	0.0453039	0.027308	ATG7/SIRT1	2
BP	GO:0009416	response to light stimulus	4/51	314/18670	0.0105472	0.0463511	0.0279392	DUSP1/KRAS/MAPK8/SIRT1	4
BP	GO:0010965	regulation of mitotic sister chromatid separation	2/51	57/18670	0.0106091	0.0463511	0.0279392	ATM/DUSP1	2
BP	GO:0042743	hydrogen peroxide metabolic process	2/51	57/18670	0.0106091	0.0463511	0.0279392	CYBB/STAT3	2
BP	GO:0043525	positive regulation of neuron apoptotic process	2/51	57/18670	0.0106091	0.0463511	0.0279392	ATM/FBXW7	2
BP	GO:0060043	regulation of cardiac muscle cell proliferation	2/51	57/18670	0.0106091	0.0463511	0.0279392	MAPK14/MAPK1	2
BP	GO:1900408	negative regulation of cellular response to oxidative stress	2/51	57/18670	0.0106091	0.0463511	0.0279392	ATG7/SIRT1	2
BP	GO:0032722	positive regulation of chemokine production	2/51	58/18670	0.0109689	0.0475723	0.0286753	HMOX1/TLR4	2
BP	GO:0071385	cellular response to glucocorticoid stimulus	2/51	58/18670	0.0109689	0.0475723	0.0286753	FLT3/ZFP36	2
BP	GO:1902041	regulation of extrinsic apoptotic signaling pathway via death domain receptors	2/51	58/18670	0.0109689	0.0475723	0.0286753	HMOX1/TNFAIP3	2
BP	GO:1904589	regulation of protein import	2/51	58/18670	0.0109689	0.0475723	0.0286753	MAPK14/MAPK1	2
BP	GO:0048660	regulation of smooth muscle cell proliferation	3/51	169/18670	0.0110409	0.0477096	0.0287581	HMOX1/MAP3K5/TNFAIP3	3
BP	GO:0051100	negative regulation of binding	3/51	169/18670	0.0110409	0.0477096	0.0287581	HMOX1/MAPK8/FBXW7	3
BP	GO:0043433	negative regulation of DNA-binding transcription factor activity	3/51	170/18670	0.0112179	0.0483862	0.0291659	HMOX1/TNFAIP3/SIRT1	3
BP	GO:1902369	negative regulation of RNA catabolic process	2/51	59/18670	0.0113342	0.0486219	0.029308	MAPK14/ZFP36	2
BP	GO:1902883	negative regulation of response to oxidative stress	2/51	59/18670	0.0113342	0.0486219	0.029308	ATG7/SIRT1	2
BP	GO:2000351	regulation of endothelial cell apoptotic process	2/51	59/18670	0.0113342	0.0486219	0.029308	TNFAIP3/AKR1C3	2
BP	GO:0048659	smooth muscle cell proliferation	3/51	171/18670	0.0113965	0.0488011	0.029416	HMOX1/MAP3K5/TNFAIP3	3
BP	GO:0050900	leukocyte migration	5/51	499/18670	0.0114332	0.0488699	0.0294575	CD44/MAPK14/DUSP1/HMOX1/SLC7A5	5
BP	GO:0051306	mitotic sister chromatid separation	2/51	60/18670	0.0117047	0.0496715	0.0299407	ATM/DUSP1	2
BP	GO:0051784	negative regulation of nuclear division	2/51	60/18670	0.0117047	0.0496715	0.0299407	ATM/DUSP1	2
BP	GO:0090342	regulation of cell aging	2/51	60/18670	0.0117047	0.0496715	0.0299407	KRAS/SIRT1	2
BP	GO:1902110	positive regulation of mitochondrial membrane permeability involved in apoptotic process	2/51	60/18670	0.0117047	0.0496715	0.0299407	BID/MAPK8	2
BP	GO:0006879	cellular iron ion homeostasis	2/51	61/18670	0.0120805	0.0509015	0.0306821	HMOX1/SLC40A1	2
BP	GO:0030888	regulation of B cell proliferation	2/51	61/18670	0.0120805	0.0509015	0.0306821	ATM/TLR4	2
BP	GO:0045604	regulation of epidermal cell differentiation	2/51	61/18670	0.0120805	0.0509015	0.0306821	MAFG/ZFP36	2
BP	GO:0050701	interleukin-1 secretion	2/51	61/18670	0.0120805	0.0509015	0.0306821	TLR4/TNFAIP3	2
BP	GO:0002695	negative regulation of leukocyte activation	3/51	175/18670	0.0121276	0.0510091	0.0307469	ATM/HMOX1/TNFAIP3	3
BP	GO:0001936	regulation of endothelial cell proliferation	3/51	176/18670	0.0123145	0.0514094	0.0309883	HMOX1/STAT3/SIRT1	3
BP	GO:0002260	lymphocyte homeostasis	2/51	62/18670	0.0124616	0.0514094	0.0309883	TNFAIP3/SLC40A1	2
BP	GO:0002753	cytoplasmic pattern recognition receptor signaling pathway	2/51	62/18670	0.0124616	0.0514094	0.0309883	TLR4/TNFAIP3	2
BP	GO:0032623	interleukin-2 production	2/51	62/18670	0.0124616	0.0514094	0.0309883	TNFAIP3/ZFP36	2
BP	GO:0046824	positive regulation of nucleocytoplasmic transport	2/51	62/18670	0.0124616	0.0514094	0.0309883	MAPK14/MAPK1	2
BP	GO:0055025	positive regulation of cardiac muscle tissue development	2/51	62/18670	0.0124616	0.0514094	0.0309883	MAPK14/MAPK1	2
BP	GO:0070059	intrinsic apoptotic signaling pathway in response to endoplasmic reticulum stress	2/51	62/18670	0.0124616	0.0514094	0.0309883	MAP3K5/SIRT1	2
BP	GO:0070265	necrotic cell death	2/51	62/18670	0.0124616	0.0514094	0.0309883	MAP3K5/TLR4	2
BP	GO:1902686	mitochondrial outer membrane permeabilization involved in programmed cell death	2/51	62/18670	0.0124616	0.0514094	0.0309883	BID/MAPK8	2
BP	GO:1904356	regulation of telomere maintenance via telomere lengthening	2/51	62/18670	0.0124616	0.0514094	0.0309883	ATM/MAPK1	2
BP	GO:1905818	regulation of chromosome separation	2/51	62/18670	0.0124616	0.0514094	0.0309883	ATM/DUSP1	2
BP	GO:0046622	positive regulation of organ growth	2/51	63/18670	0.0128479	0.0527832	0.0318163	MAPK14/MAPK1	2
BP	GO:0016042	lipid catabolic process	4/51	333/18670	0.0128614	0.0527832	0.0318163	IDH1/AKR1C3/LPIN1/SESN2	4
BP	GO:0032147	activation of protein kinase activity	4/51	333/18670	0.0128614	0.0527832	0.0318163	MAPK14/MAP3K5/MAPK1/TLR4	4
BP	GO:0043534	blood vessel endothelial cell migration	3/51	180/18670	0.0130786	0.0535817	0.0322976	HMOX1/SIRT1/FBXW7	3
BP	GO:0035794	positive regulation of mitochondrial membrane permeability	2/51	64/18670	0.0132394	0.0538674	0.0324699	BID/MAPK8	2
BP	GO:0045600	positive regulation of fat cell differentiation	2/51	64/18670	0.0132394	0.0538674	0.0324699	MAPK14/ZFP36	2
BP	GO:0045670	regulation of osteoclast differentiation	2/51	64/18670	0.0132394	0.0538674	0.0324699	TLR4/FBXW7	2
BP	GO:2000378	negative regulation of reactive oxygen species metabolic process	2/51	64/18670	0.0132394	0.0538674	0.0324699	G6PD/STAT3	2
BP	GO:0048015	phosphatidylinositol-mediated signaling	3/51	181/18670	0.0132738	0.053915	0.0324985	FLT3/MAPK1/SIRT1	3
BP	GO:0072665	protein localization to vacuole	2/51	65/18670	0.013636	0.0552913	0.0333282	LAMP2/TNFAIP3	2
BP	GO:0043409	negative regulation of MAPK cascade	3/51	184/18670	0.0138695	0.0559504	0.0337254	DUSP1/PEBP1/TLR4	3
BP	GO:0048017	inositol lipid-mediated signaling	3/51	184/18670	0.0138695	0.0559504	0.0337254	FLT3/MAPK1/SIRT1	3
BP	GO:0050864	regulation of B cell activation	3/51	184/18670	0.0138695	0.0559504	0.0337254	ATM/TLR4/TNFAIP3	3
BP	GO:1902108	regulation of mitochondrial membrane permeability involved in apoptotic process	2/51	66/18670	0.0140378	0.0564374	0.034019	BID/MAPK8	2
BP	GO:1905710	positive regulation of membrane permeability	2/51	66/18670	0.0140378	0.0564374	0.034019	BID/MAPK8	2
BP	GO:1903708	positive regulation of hemopoiesis	3/51	185/18670	0.0140713	0.0564762	0.0340424	ACVR1B/MAPK14/STAT3	3
BP	GO:0072330	monocarboxylic acid biosynthetic process	4/51	343/18670	0.0142005	0.0568982	0.0342967	ALOX5/STAT3/AKR1C3/SIRT1	4
BP	GO:0010721	negative regulation of cell development	4/51	344/18670	0.0143391	0.0572951	0.034536	G6PD/STAT3/ULK2/FBXW7	4
BP	GO:0015807	L-amino acid transport	2/51	67/18670	0.0144448	0.0572951	0.034536	SLC7A5/SLC38A1	2
BP	GO:0019748	secondary metabolic process	2/51	67/18670	0.0144448	0.0572951	0.034536	CBS/AKR1C3	2
BP	GO:0048662	negative regulation of smooth muscle cell proliferation	2/51	67/18670	0.0144448	0.0572951	0.034536	HMOX1/TNFAIP3	2
BP	GO:0060038	cardiac muscle cell proliferation	2/51	67/18670	0.0144448	0.0572951	0.034536	MAPK14/MAPK1	2
BP	GO:2000573	positive regulation of DNA biosynthetic process	2/51	67/18670	0.0144448	0.0572951	0.034536	ATM/MAPK1	2
BP	GO:0019915	lipid storage	2/51	68/18670	0.0148567	0.0584398	0.035226	SIRT1/FBXW7	2
BP	GO:0033047	regulation of mitotic sister chromatid segregation	2/51	68/18670	0.0148567	0.0584398	0.035226	ATM/DUSP1	2
BP	GO:0035924	cellular response to vascular endothelial growth factor stimulus	2/51	68/18670	0.0148567	0.0584398	0.035226	MAPK14/FLT3	2
BP	GO:0046323	glucose import	2/51	68/18670	0.0148567	0.0584398	0.035226	MAPK14/SESN2	2
BP	GO:0071242	cellular response to ammonium ion	2/51	68/18670	0.0148567	0.0584398	0.035226	MAPK1/ATG7	2
BP	GO:0000819	sister chromatid segregation	3/51	189/18670	0.0148957	0.0584958	0.0352597	ATM/DUSP1/FBXW7	3
BP	GO:0007178	transmembrane receptor protein serine/threonine kinase signaling pathway	4/51	349/18670	0.0150451	0.0589846	0.0355544	ACVR1B/MAPK14/ZEB1/SIRT1	4
BP	GO:0001935	endothelial cell proliferation	3/51	191/18670	0.0153179	0.0598184	0.036057	HMOX1/STAT3/SIRT1	3
BP	GO:0071478	cellular response to radiation	3/51	191/18670	0.0153179	0.0598184	0.036057	ATM/MAPK14/SIRT1	3
BP	GO:0010631	epithelial cell migration	4/51	351/18670	0.0153335	0.0598184	0.036057	DPP4/HMOX1/SIRT1/FBXW7	4
BP	GO:0030098	lymphocyte differentiation	4/51	353/18670	0.0156255	0.0607316	0.0366074	ATM/FLT3/STAT3/ZEB1	4
BP	GO:0007004	telomere maintenance via telomerase	2/51	70/18670	0.0156958	0.0607316	0.0366074	ATM/MAPK1	2
BP	GO:0032720	negative regulation of tumor necrosis factor production	2/51	70/18670	0.0156958	0.0607316	0.0366074	TLR4/TNFAIP3	2
BP	GO:0034121	regulation of toll-like receptor signaling pathway	2/51	70/18670	0.0156958	0.0607316	0.0366074	TLR4/TNFAIP3	2
BP	GO:0061515	myeloid cell development	2/51	70/18670	0.0156958	0.0607316	0.0366074	G6PD/FBXW7	2
BP	GO:0090132	epithelium migration	4/51	354/18670	0.0157728	0.0609297	0.0367268	DPP4/HMOX1/SIRT1/FBXW7	4
BP	GO:0042531	positive regulation of tyrosine phosphorylation of STAT protein	2/51	71/18670	0.0161229	0.0620796	0.0374199	FLT3/STAT3	2
BP	GO:0050795	regulation of behavior	2/51	71/18670	0.0161229	0.0620796	0.0374199	STAT3/ARRDC3	2
BP	GO:0002685	regulation of leukocyte migration	3/51	196/18670	0.0164031	0.062954	0.037947	MAPK14/DUSP1/HMOX1	3
BP	GO:0006694	steroid biosynthetic process	3/51	196/18670	0.0164031	0.062954	0.037947	G6PD/AKR1C3/SIRT1	3
BP	GO:1903556	negative regulation of tumor necrosis factor superfamily cytokine production	2/51	72/18670	0.0165549	0.0634335	0.0382361	TLR4/TNFAIP3	2
BP	GO:0090130	tissue migration	4/51	360/18670	0.016675	0.0637905	0.0384512	DPP4/HMOX1/SIRT1/FBXW7	4
BP	GO:0031099	regeneration	3/51	198/18670	0.0168491	0.0643525	0.03879	FLT3/HMOX1/LPIN1	3
BP	GO:0006801	superoxide metabolic process	2/51	73/18670	0.0169918	0.064689	0.0389928	CYBB/NCF2	2
BP	GO:0043627	response to estrogen	2/51	73/18670	0.0169918	0.064689	0.0389928	HMOX1/MAPK1	2
BP	GO:0007179	transforming growth factor beta receptor signaling pathway	3/51	199/18670	0.0170746	0.0647958	0.0390572	ACVR1B/ZEB1/SIRT1	3
BP	GO:0050866	negative regulation of cell activation	3/51	199/18670	0.0170746	0.0647958	0.0390572	ATM/HMOX1/TNFAIP3	3
BP	GO:0018108	peptidyl-tyrosine phosphorylation	4/51	363/18670	0.017138	0.0649325	0.0391396	CD44/FLT3/STAT3/FBXW7	4
BP	GO:0031670	cellular response to nutrient	2/51	74/18670	0.0174336	0.065737	0.0396245	CYBB/HMOX1	2
BP	GO:0051145	smooth muscle cell differentiation	2/51	74/18670	0.0174336	0.065737	0.0396245	ZEB1/SIRT1	2
BP	GO:0070373	negative regulation of ERK1 and ERK2 cascade	2/51	74/18670	0.0174336	0.065737	0.0396245	DUSP1/TLR4	2
BP	GO:0018212	peptidyl-tyrosine modification	4/51	366/18670	0.0176091	0.0662931	0.0399597	CD44/FLT3/STAT3/FBXW7	4
BP	GO:1902806	regulation of cell cycle G1/S phase transition	3/51	202/18670	0.0177613	0.0667598	0.0402411	ATM/BID/FBXW7	3
BP	GO:0002479	antigen processing and presentation of exogenous peptide antigen via MHC class I, TAP-dependent	2/51	75/18670	0.0178803	0.0671008	0.0404466	CYBB/NCF2	2
BP	GO:0031396	regulation of protein ubiquitination	3/51	204/18670	0.0182276	0.0681878	0.0411018	TNFAIP3/FBXW7/ARRDC3	3
BP	GO:0035265	organ growth	3/51	204/18670	0.0182276	0.0681878	0.0411018	MAPK14/G6PD/MAPK1	3
BP	GO:0097164	ammonium ion metabolic process	3/51	205/18670	0.0184633	0.0689607	0.0415677	SAT1/AKR1C3/LPIN1	3
BP	GO:0006790	sulfur compound metabolic process	4/51	372/18670	0.0185755	0.0692706	0.0417545	CBS/ACSL4/G6PD/IDH1	4
BP	GO:0006109	regulation of carbohydrate metabolic process	3/51	206/18670	0.0187007	0.0696277	0.0419698	STAT3/SIRT1/SESN2	3
BP	GO:0001701	in utero embryonic development	4/51	373/18670	0.0187397	0.0696636	0.0419914	ACVR1B/EPAS1/MAFG/MAPK1	4
BP	GO:0006278	RNA-dependent DNA biosynthetic process	2/51	77/18670	0.0187882	0.0697344	0.0420341	ATM/MAPK1	2
BP	GO:0070664	negative regulation of leukocyte proliferation	2/51	78/18670	0.0192494	0.0712227	0.0429312	ATM/TNFAIP3	2
BP	GO:0072332	intrinsic apoptotic signaling pathway by p53 class mediator	2/51	78/18670	0.0192494	0.0712227	0.0429312	CD44/SIRT1	2
BP	GO:0017148	negative regulation of translation	3/51	209/18670	0.0194232	0.0716418	0.0431838	STAT3/ZFP36/SESN2	3
BP	GO:0051216	cartilage development	3/51	209/18670	0.0194232	0.0716418	0.0431838	CD44/MAPK14/ZEB1	3
BP	GO:0009612	response to mechanical stimulus	3/51	210/18670	0.0196674	0.072046	0.0434275	MAPK14/MAPK8/TLR4	3
BP	GO:0050707	regulation of cytokine secretion	3/51	210/18670	0.0196674	0.072046	0.0434275	MAPK14/TLR4/TNFAIP3	3
BP	GO:0042590	antigen processing and presentation of exogenous peptide antigen via MHC class I	2/51	79/18670	0.0197153	0.072046	0.0434275	CYBB/NCF2	2
BP	GO:0043536	positive regulation of blood vessel endothelial cell migration	2/51	79/18670	0.0197153	0.072046	0.0434275	HMOX1/SIRT1	2
BP	GO:0071260	cellular response to mechanical stimulus	2/51	79/18670	0.0197153	0.072046	0.0434275	MAPK8/TLR4	2
BP	GO:1903312	negative regulation of mRNA metabolic process	2/51	79/18670	0.0197153	0.072046	0.0434275	MAPK14/ZFP36	2
BP	GO:0042176	regulation of protein catabolic process	4/51	381/18670	0.0200863	0.0732887	0.0441765	TNFAIP3/ATG7/GABARAPL2/FBXW7	4
BP	GO:0022617	extracellular matrix disassembly	2/51	80/18670	0.0201859	0.0734259	0.0442592	CD44/DPP4	2
BP	GO:0033045	regulation of sister chromatid segregation	2/51	80/18670	0.0201859	0.0734259	0.0442592	ATM/DUSP1	2
BP	GO:0032204	regulation of telomere maintenance	2/51	81/18670	0.0206613	0.0748107	0.0450939	ATM/MAPK1	2
BP	GO:0007254	JNK cascade	3/51	214/18670	0.0206614	0.0748107	0.0450939	MAP3K5/MAPK8/TLR4	3
BP	GO:0045732	positive regulation of protein catabolic process	3/51	214/18670	0.0206614	0.0748107	0.0450939	TNFAIP3/ATG7/FBXW7	3
BP	GO:1901653	cellular response to peptide	4/51	385/18670	0.0207815	0.0751308	0.0452869	STAT3/TLR4/LPIN1/SIRT1	4
BP	GO:0032388	positive regulation of intracellular transport	3/51	215/18670	0.0209142	0.075495	0.0455064	MAPK14/MAPK1/FBXW7	3
BP	GO:0010833	telomere maintenance via telomere lengthening	2/51	82/18670	0.0211413	0.0758356	0.0457117	ATM/MAPK1	2
BP	GO:0032642	regulation of chemokine production	2/51	82/18670	0.0211413	0.0758356	0.0457117	HMOX1/TLR4	2
BP	GO:0090049	regulation of cell migration involved in sprouting angiogenesis	2/51	82/18670	0.0211413	0.0758356	0.0457117	HMOX1/FBXW7	2
BP	GO:0000075	cell cycle checkpoint	3/51	216/18670	0.0211686	0.0758356	0.0457117	ATM/MAPK14/DUSP1	3
BP	GO:0002699	positive regulation of immune effector process	3/51	216/18670	0.0211686	0.0758356	0.0457117	MAPK14/HMOX1/TLR4	3
BP	GO:0042509	regulation of tyrosine phosphorylation of STAT protein	2/51	83/18670	0.0216259	0.0773568	0.0466287	FLT3/STAT3	2
BP	GO:0045682	regulation of epidermis development	2/51	85/18670	0.0226091	0.0805087	0.0485285	MAFG/ZFP36	2
BP	GO:1904705	regulation of vascular smooth muscle cell proliferation	2/51	85/18670	0.0226091	0.0805087	0.0485285	HMOX1/MAP3K5	2
BP	GO:1990874	vascular smooth muscle cell proliferation	2/51	85/18670	0.0226091	0.0805087	0.0485285	HMOX1/MAP3K5	2
BP	GO:0070663	regulation of leukocyte proliferation	3/51	222/18670	0.0227315	0.080823	0.048718	ATM/TLR4/TNFAIP3	3
BP	GO:0040013	negative regulation of locomotion	4/51	396/18670	0.0227698	0.0808377	0.0487269	DUSP1/HMOX1/STAT3/ARRDC3	4
BP	GO:0003333	amino acid transmembrane transport	2/51	86/18670	0.0231075	0.0816695	0.0492282	SLC7A5/SLC38A1	2
BP	GO:0007260	tyrosine phosphorylation of STAT protein	2/51	86/18670	0.0231075	0.0816695	0.0492282	FLT3/STAT3	2
BP	GO:0032760	positive regulation of tumor necrosis factor production	2/51	86/18670	0.0231075	0.0816695	0.0492282	CYBB/TLR4	2
BP	GO:0033157	regulation of intracellular protein transport	3/51	225/18670	0.023536	0.082829	0.0499271	MAPK14/MAPK1/FBXW7	3
BP	GO:0001892	embryonic placenta development	2/51	87/18670	0.0236105	0.082829	0.0499271	EPAS1/MAPK1	2
BP	GO:0014068	positive regulation of phosphatidylinositol 3-kinase signaling	2/51	87/18670	0.0236105	0.082829	0.0499271	FLT3/SIRT1	2
BP	GO:0045844	positive regulation of striated muscle tissue development	2/51	87/18670	0.0236105	0.082829	0.0499271	MAPK14/MAPK1	2
BP	GO:0048636	positive regulation of muscle organ development	2/51	87/18670	0.0236105	0.082829	0.0499271	MAPK14/MAPK1	2
BP	GO:0032088	negative regulation of NF-kappaB transcription factor activity	2/51	88/18670	0.0241179	0.0841108	0.0506998	TNFAIP3/SIRT1	2
BP	GO:1901863	positive regulation of muscle tissue development	2/51	88/18670	0.0241179	0.0841108	0.0506998	MAPK14/MAPK1	2
BP	GO:1903557	positive regulation of tumor necrosis factor superfamily cytokine production	2/51	88/18670	0.0241179	0.0841108	0.0506998	CYBB/TLR4	2
BP	GO:1903725	regulation of phospholipid metabolic process	2/51	88/18670	0.0241179	0.0841108	0.0506998	FLT3/IDH1	2
BP	GO:0051054	positive regulation of DNA metabolic process	3/51	228/18670	0.0243559	0.0848159	0.0511248	ATM/MAPK1/SIRT1	3
BP	GO:0006094	gluconeogenesis	2/51	89/18670	0.0246299	0.0849055	0.0511788	SIRT1/SESN2	2
BP	GO:0006497	protein lipidation	2/51	89/18670	0.0246299	0.0849055	0.0511788	ATG7/WIPI1	2
BP	GO:0032602	chemokine production	2/51	89/18670	0.0246299	0.0849055	0.0511788	HMOX1/TLR4	2
BP	GO:0046427	positive regulation of JAK-STAT cascade	2/51	89/18670	0.0246299	0.0849055	0.0511788	FLT3/STAT3	2
BP	GO:0097306	cellular response to alcohol	2/51	89/18670	0.0246299	0.0849055	0.0511788	CYBB/AKR1C3	2
BP	GO:0010594	regulation of endothelial cell migration	3/51	229/18670	0.0246326	0.0849055	0.0511788	HMOX1/SIRT1/FBXW7	3
BP	GO:0034249	negative regulation of cellular amide metabolic process	3/51	229/18670	0.0246326	0.0849055	0.0511788	STAT3/ZFP36/SESN2	3
BP	GO:0030641	regulation of cellular pH	2/51	90/18670	0.0251463	0.0861741	0.0519435	MAFG/MAPK1	2
BP	GO:0032651	regulation of interleukin-1 beta production	2/51	90/18670	0.0251463	0.0861741	0.0519435	TLR4/TNFAIP3	2
BP	GO:0051304	chromosome separation	2/51	90/18670	0.0251463	0.0861741	0.0519435	ATM/DUSP1	2
BP	GO:0071674	mononuclear cell migration	2/51	90/18670	0.0251463	0.0861741	0.0519435	MAPK14/DUSP1	2
BP	GO:1903320	regulation of protein modification by small protein conjugation or removal	3/51	231/18670	0.0251912	0.0862036	0.0519612	TNFAIP3/FBXW7/ARRDC3	3
BP	GO:0007517	muscle organ development	4/51	410/18670	0.025464	0.087011	0.052448	MAPK14/G6PD/MAPK1/SIRT1	4
BP	GO:0048738	cardiac muscle tissue development	3/51	233/18670	0.0257567	0.0878845	0.0529745	MAPK14/G6PD/MAPK1	3
BP	GO:0019319	hexose biosynthetic process	2/51	92/18670	0.0261923	0.0882755	0.0532101	SIRT1/SESN2	2
BP	GO:1904894	positive regulation of STAT cascade	2/51	92/18670	0.0261923	0.0882755	0.0532101	FLT3/STAT3	2
BP	GO:0006469	negative regulation of protein kinase activity	3/51	235/18670	0.026329	0.0882755	0.0532101	DUSP1/TNFAIP3/SIRT1	3
BP	GO:0035278	miRNA mediated inhibition of translation	2/51	93/18670	0.0267219	0.0882755	0.0532101	STAT3/ZFP36	2
BP	GO:0040033	negative regulation of translation, ncRNA-mediated	2/51	93/18670	0.0267219	0.0882755	0.0532101	STAT3/ZFP36	2
BP	GO:0045974	regulation of translation, ncRNA-mediated	2/51	93/18670	0.0267219	0.0882755	0.0532101	STAT3/ZFP36	2
BP	GO:1901655	cellular response to ketone	2/51	93/18670	0.0267219	0.0882755	0.0532101	AKR1C3/SIRT1	2
BP	GO:0000012	single strand break repair	1/51	10/18670	0.0269896	0.0882755	0.0532101	SIRT1	1
BP	GO:0010918	positive regulation of mitochondrial membrane potential	1/51	10/18670	0.0269896	0.0882755	0.0532101	BID	1
BP	GO:0015801	aromatic amino acid transport	1/51	10/18670	0.0269896	0.0882755	0.0532101	SLC7A5	1
BP	GO:0016102	diterpenoid biosynthetic process	1/51	10/18670	0.0269896	0.0882755	0.0532101	AKR1C3	1
BP	GO:0030647	aminoglycoside antibiotic metabolic process	1/51	10/18670	0.0269896	0.0882755	0.0532101	AKR1C3	1
BP	GO:0032070	regulation of deoxyribonuclease activity	1/51	10/18670	0.0269896	0.0882755	0.0532101	SIRT1	1
BP	GO:0032464	positive regulation of protein homooligomerization	1/51	10/18670	0.0269896	0.0882755	0.0532101	BID	1
BP	GO:0032875	regulation of DNA endoreduplication	1/51	10/18670	0.0269896	0.0882755	0.0532101	FBXW7	1
BP	GO:0034135	regulation of toll-like receptor 2 signaling pathway	1/51	10/18670	0.0269896	0.0882755	0.0532101	TNFAIP3	1
BP	GO:0035871	protein K11-linked deubiquitination	1/51	10/18670	0.0269896	0.0882755	0.0532101	TNFAIP3	1
BP	GO:0045741	positive regulation of epidermal growth factor-activated receptor activity	1/51	10/18670	0.0269896	0.0882755	0.0532101	FBXW7	1
BP	GO:0051409	response to nitrosative stress	1/51	10/18670	0.0269896	0.0882755	0.0532101	ATM	1
BP	GO:0071104	response to interleukin-9	1/51	10/18670	0.0269896	0.0882755	0.0532101	STAT3	1
BP	GO:0071233	cellular response to leucine	1/51	10/18670	0.0269896	0.0882755	0.0532101	SESN2	1
BP	GO:0071501	cellular response to sterol depletion	1/51	10/18670	0.0269896	0.0882755	0.0532101	FBXW7	1
BP	GO:0072610	interleukin-12 secretion	1/51	10/18670	0.0269896	0.0882755	0.0532101	MAPK14	1
BP	GO:0090336	positive regulation of brown fat cell differentiation	1/51	10/18670	0.0269896	0.0882755	0.0532101	MAPK14	1
BP	GO:0140052	cellular response to oxidised low-density lipoprotein particle stimulus	1/51	10/18670	0.0269896	0.0882755	0.0532101	TLR4	1
BP	GO:1902237	positive regulation of endoplasmic reticulum stress-induced intrinsic apoptotic signaling pathway	1/51	10/18670	0.0269896	0.0882755	0.0532101	SIRT1	1
BP	GO:1990253	cellular response to leucine starvation	1/51	10/18670	0.0269896	0.0882755	0.0532101	SESN2	1
BP	GO:2000109	regulation of macrophage apoptotic process	1/51	10/18670	0.0269896	0.0882755	0.0532101	SIRT1	1
BP	GO:2000271	positive regulation of fibroblast apoptotic process	1/51	10/18670	0.0269896	0.0882755	0.0532101	BID	1
BP	GO:2000480	negative regulation of cAMP-dependent protein kinase activity	1/51	10/18670	0.0269896	0.0882755	0.0532101	SIRT1	1
BP	GO:0051222	positive regulation of protein transport	4/51	418/18670	0.0270868	0.0884711	0.0533281	MAPK14/MAPK1/TLR4/FBXW7	4
BP	GO:0042158	lipoprotein biosynthetic process	2/51	94/18670	0.0272558	0.0889005	0.0535869	ATG7/WIPI1	2
BP	GO:0043588	skin development	4/51	419/18670	0.027294	0.0889025	0.0535881	ACVR1B/ZFP36/AKR1C3/ARRDC3	4
BP	GO:0050663	cytokine secretion	3/51	240/18670	0.0277896	0.0899131	0.0541972	MAPK14/TLR4/TNFAIP3	3
BP	GO:0002702	positive regulation of production of molecular mediator of immune response	2/51	95/18670	0.0277941	0.0899131	0.0541972	MAPK14/TLR4	2
BP	GO:0042100	B cell proliferation	2/51	95/18670	0.0277941	0.0899131	0.0541972	ATM/TLR4	2
BP	GO:0042116	macrophage activation	2/51	95/18670	0.0277941	0.0899131	0.0541972	ATM/TLR4	2
BP	GO:0050810	regulation of steroid biosynthetic process	2/51	95/18670	0.0277941	0.0899131	0.0541972	AKR1C3/SIRT1	2
BP	GO:0042593	glucose homeostasis	3/51	241/18670	0.0280868	0.0904752	0.0545361	STAT3/SIRT1/SESN2	3
BP	GO:0090092	regulation of transmembrane receptor protein serine/threonine kinase signaling pathway	3/51	241/18670	0.0280868	0.0904752	0.0545361	ACVR1B/ZEB1/SIRT1	3
BP	GO:0032386	regulation of intracellular transport	4/51	423/18670	0.0281321	0.0904752	0.0545361	MAPK14/HMOX1/MAPK1/FBXW7	4
BP	GO:0002474	antigen processing and presentation of peptide antigen via MHC class I	2/51	96/18670	0.0283366	0.0904752	0.0545361	CYBB/NCF2	2
BP	GO:0032755	positive regulation of interleukin-6 production	2/51	96/18670	0.0283366	0.0904752	0.0545361	STAT3/TLR4	2
BP	GO:0006417	regulation of translation	4/51	424/18670	0.0283441	0.0904752	0.0545361	MAPK1/STAT3/ZFP36/SESN2	4
BP	GO:0033500	carbohydrate homeostasis	3/51	242/18670	0.0283858	0.0904752	0.0545361	STAT3/SIRT1/SESN2	3
BP	GO:0043255	regulation of carbohydrate biosynthetic process	2/51	97/18670	0.0288834	0.0904752	0.0545361	SIRT1/SESN2	2
BP	GO:0120162	positive regulation of cold-induced thermogenesis	2/51	97/18670	0.0288834	0.0904752	0.0545361	EPAS1/LPIN1	2
BP	GO:2001022	positive regulation of response to DNA damage stimulus	2/51	97/18670	0.0288834	0.0904752	0.0545361	ATM/SIRT1	2
BP	GO:0002042	cell migration involved in sprouting angiogenesis	2/51	98/18670	0.0294345	0.0904752	0.0545361	HMOX1/FBXW7	2
BP	GO:0006626	protein targeting to mitochondrion	2/51	98/18670	0.0294345	0.0904752	0.0545361	BID/FBXW7	2
BP	GO:0006885	regulation of pH	2/51	98/18670	0.0294345	0.0904752	0.0545361	MAFG/MAPK1	2
BP	GO:0006644	phospholipid metabolic process	4/51	430/18670	0.0296359	0.0904752	0.0545361	ATM/FLT3/IDH1/LPIN1	4
BP	GO:0002328	pro-B cell differentiation	1/51	11/18670	0.029649	0.0904752	0.0545361	FLT3	1
BP	GO:0002730	regulation of dendritic cell cytokine production	1/51	11/18670	0.029649	0.0904752	0.0545361	TLR4	1
BP	GO:0002887	negative regulation of myeloid leukocyte mediated immunity	1/51	11/18670	0.029649	0.0904752	0.0545361	HMOX1	1
BP	GO:0019371	cyclooxygenase pathway	1/51	11/18670	0.029649	0.0904752	0.0545361	AKR1C3	1
BP	GO:0019852	L-ascorbic acid metabolic process	1/51	11/18670	0.029649	0.0904752	0.0545361	SLC2A3	1
BP	GO:0031987	locomotion involved in locomotory behavior	1/51	11/18670	0.029649	0.0904752	0.0545361	ARRDC3	1
BP	GO:0032351	negative regulation of hormone metabolic process	1/51	11/18670	0.029649	0.0904752	0.0545361	AKR1C3	1
BP	GO:0032490	detection of molecule of bacterial origin	1/51	11/18670	0.029649	0.0904752	0.0545361	TLR4	1
BP	GO:0033632	regulation of cell-cell adhesion mediated by integrin	1/51	11/18670	0.029649	0.0904752	0.0545361	DPP4	1
BP	GO:0042023	DNA endoreduplication	1/51	11/18670	0.029649	0.0904752	0.0545361	FBXW7	1
BP	GO:0043129	surfactant homeostasis	1/51	11/18670	0.029649	0.0904752	0.0545361	EPAS1	1
BP	GO:0045141	meiotic telomere clustering	1/51	11/18670	0.029649	0.0904752	0.0545361	ATM	1
BP	GO:0045351	type I interferon biosynthetic process	1/51	11/18670	0.029649	0.0904752	0.0545361	TLR4	1
BP	GO:0046439	L-cysteine metabolic process	1/51	11/18670	0.029649	0.0904752	0.0545361	CBS	1
BP	GO:0051573	negative regulation of histone H3-K9 methylation	1/51	11/18670	0.029649	0.0904752	0.0545361	SIRT1	1
BP	GO:0051574	positive regulation of histone H3-K9 methylation	1/51	11/18670	0.029649	0.0904752	0.0545361	SIRT1	1
BP	GO:0060439	trachea morphogenesis	1/51	11/18670	0.029649	0.0904752	0.0545361	MAPK1	1
BP	GO:0061307	cardiac neural crest cell differentiation involved in heart development	1/51	11/18670	0.029649	0.0904752	0.0545361	MAPK1	1
BP	GO:0061308	cardiac neural crest cell development involved in heart development	1/51	11/18670	0.029649	0.0904752	0.0545361	MAPK1	1
BP	GO:0070106	interleukin-27-mediated signaling pathway	1/51	11/18670	0.029649	0.0904752	0.0545361	STAT3	1
BP	GO:0070673	response to interleukin-18	1/51	11/18670	0.029649	0.0904752	0.0545361	ALOX5	1
BP	GO:0070757	interleukin-35-mediated signaling pathway	1/51	11/18670	0.029649	0.0904752	0.0545361	STAT3	1
BP	GO:0070857	regulation of bile acid biosynthetic process	1/51	11/18670	0.029649	0.0904752	0.0545361	SIRT1	1
BP	GO:0072584	caveolin-mediated endocytosis	1/51	11/18670	0.029649	0.0904752	0.0545361	MAPK1	1
BP	GO:0106072	negative regulation of adenylate cyclase-activating G protein-coupled receptor signaling pathway	1/51	11/18670	0.029649	0.0904752	0.0545361	ARRDC3	1
BP	GO:1900112	regulation of histone H3-K9 trimethylation	1/51	11/18670	0.029649	0.0904752	0.0545361	SIRT1	1
BP	GO:1903011	negative regulation of bone development	1/51	11/18670	0.029649	0.0904752	0.0545361	FBXW7	1
BP	GO:1905146	lysosomal protein catabolic process	1/51	11/18670	0.029649	0.0904752	0.0545361	LAMP2	1
BP	GO:2000392	regulation of lamellipodium morphogenesis	1/51	11/18670	0.029649	0.0904752	0.0545361	CD44	1
BP	GO:2001204	regulation of osteoclast development	1/51	11/18670	0.029649	0.0904752	0.0545361	FBXW7	1
BP	GO:1903362	regulation of cellular protein catabolic process	3/51	247/18670	0.0299062	0.0911426	0.0549384	TNFAIP3/GABARAPL2/FBXW7	3
BP	GO:0019395	fatty acid oxidation	2/51	99/18670	0.0299897	0.0912798	0.0550211	MAPK14/SESN2	2
BP	GO:0006605	protein targeting	4/51	432/18670	0.0300742	0.0914195	0.0551053	BID/IDH1/LAMP2/FBXW7	4
BP	GO:0071560	cellular response to transforming growth factor beta stimulus	3/51	249/18670	0.0305262	0.0926745	0.0558617	ACVR1B/ZEB1/SIRT1	3
BP	GO:0032611	interleukin-1 beta production	2/51	101/18670	0.0311128	0.0939671	0.0566409	TLR4/TNFAIP3	2
BP	GO:0034440	lipid oxidation	2/51	101/18670	0.0311128	0.0939671	0.0566409	MAPK14/SESN2	2
BP	GO:0048661	positive regulation of smooth muscle cell proliferation	2/51	101/18670	0.0311128	0.0939671	0.0566409	HMOX1/MAP3K5	2
BP	GO:1903426	regulation of reactive oxygen species biosynthetic process	2/51	101/18670	0.0311128	0.0939671	0.0566409	STAT3/TLR4	2
BP	GO:0098869	cellular oxidant detoxification	2/51	102/18670	0.0316805	0.0939671	0.0566409	TXNRD1/SESN2	2
BP	GO:0032652	regulation of interleukin-1 production	2/51	103/18670	0.0322524	0.0939671	0.0566409	TLR4/TNFAIP3	2
BP	GO:0051983	regulation of chromosome segregation	2/51	103/18670	0.0322524	0.0939671	0.0566409	ATM/DUSP1	2
BP	GO:1902106	negative regulation of leukocyte differentiation	2/51	103/18670	0.0322524	0.0939671	0.0566409	TLR4/FBXW7	2
BP	GO:0002371	dendritic cell cytokine production	1/51	12/18670	0.0323012	0.0939671	0.0566409	TLR4	1
BP	GO:0006264	mitochondrial DNA replication	1/51	12/18670	0.0323012	0.0939671	0.0566409	ATG7	1
BP	GO:0006563	L-serine metabolic process	1/51	12/18670	0.0323012	0.0939671	0.0566409	CBS	1
BP	GO:0006991	response to sterol depletion	1/51	12/18670	0.0323012	0.0939671	0.0566409	FBXW7	1
BP	GO:0007077	mitotic nuclear envelope disassembly	1/51	12/18670	0.0323012	0.0939671	0.0566409	LPIN1	1
BP	GO:0031392	regulation of prostaglandin biosynthetic process	1/51	12/18670	0.0323012	0.0939671	0.0566409	SIRT1	1
BP	GO:0034497	protein localization to phagophore assembly site	1/51	12/18670	0.0323012	0.0939671	0.0566409	WIPI1	1
BP	GO:0036005	response to macrophage colony-stimulating factor	1/51	12/18670	0.0323012	0.0939671	0.0566409	TLR4	1
BP	GO:0036006	cellular response to macrophage colony-stimulating factor stimulus	1/51	12/18670	0.0323012	0.0939671	0.0566409	TLR4	1
BP	GO:0045080	positive regulation of chemokine biosynthetic process	1/51	12/18670	0.0323012	0.0939671	0.0566409	HMOX1	1
BP	GO:0045416	positive regulation of interleukin-8 biosynthetic process	1/51	12/18670	0.0323012	0.0939671	0.0566409	TLR4	1
BP	GO:0051095	regulation of helicase activity	1/51	12/18670	0.0323012	0.0939671	0.0566409	SIRT1	1
BP	GO:0060019	radial glial cell differentiation	1/51	12/18670	0.0323012	0.0939671	0.0566409	STAT3	1
BP	GO:0060213	positive regulation of nuclear-transcribed mRNA poly(A) tail shortening	1/51	12/18670	0.0323012	0.0939671	0.0566409	ZFP36	1
BP	GO:0061450	trophoblast cell migration	1/51	12/18670	0.0323012	0.0939671	0.0566409	ACVR1B	1
BP	GO:0070486	leukocyte aggregation	1/51	12/18670	0.0323012	0.0939671	0.0566409	CD44	1
BP	GO:0071044	histone mRNA catabolic process	1/51	12/18670	0.0323012	0.0939671	0.0566409	ATM	1
BP	GO:0071481	cellular response to X-ray	1/51	12/18670	0.0323012	0.0939671	0.0566409	ATM	1
BP	GO:0071888	macrophage apoptotic process	1/51	12/18670	0.0323012	0.0939671	0.0566409	SIRT1	1
BP	GO:0072540	T-helper 17 cell lineage commitment	1/51	12/18670	0.0323012	0.0939671	0.0566409	STAT3	1
BP	GO:0090209	negative regulation of triglyceride metabolic process	1/51	12/18670	0.0323012	0.0939671	0.0566409	FBXW7	1
BP	GO:0090220	chromosome localization to nuclear envelope involved in homologous chromosome segregation	1/51	12/18670	0.0323012	0.0939671	0.0566409	ATM	1
BP	GO:0097284	hepatocyte apoptotic process	1/51	12/18670	0.0323012	0.0939671	0.0566409	BID	1
BP	GO:0150065	regulation of deacetylase activity	1/51	12/18670	0.0323012	0.0939671	0.0566409	MAPK8	1
BP	GO:1901163	regulation of trophoblast cell migration	1/51	12/18670	0.0323012	0.0939671	0.0566409	ACVR1B	1
BP	GO:2001223	negative regulation of neuron migration	1/51	12/18670	0.0323012	0.0939671	0.0566409	STAT3	1
BP	GO:0071559	response to transforming growth factor beta	3/51	255/18670	0.0324272	0.0942179	0.0567921	ACVR1B/ZEB1/SIRT1	3
BP	GO:0090596	sensory organ morphogenesis	3/51	256/18670	0.03275	0.0950335	0.0572837	MAPK1/STAT3/ZEB1	3
BP	GO:0046822	regulation of nucleocytoplasmic transport	2/51	104/18670	0.0328283	0.0950335	0.0572837	MAPK14/MAPK1	2
BP	GO:2001237	negative regulation of extrinsic apoptotic signaling pathway	2/51	104/18670	0.0328283	0.0950335	0.0572837	HMOX1/TNFAIP3	2
BP	GO:0033673	negative regulation of kinase activity	3/51	257/18670	0.0330744	0.0956291	0.0576427	DUSP1/TNFAIP3/SIRT1	3
BP	GO:0008593	regulation of Notch signaling pathway	2/51	105/18670	0.0334083	0.0964766	0.0581536	STAT3/FBXW7	2
BP	GO:0008654	phospholipid biosynthetic process	3/51	260/18670	0.034058	0.0969593	0.0584445	ATM/IDH1/LPIN1	3
BP	GO:0051091	positive regulation of DNA-binding transcription factor activity	3/51	261/18670	0.0343892	0.0969593	0.0584445	KRAS/STAT3/TLR4	3
BP	GO:0098813	nuclear chromosome segregation	3/51	262/18670	0.0347221	0.0969593	0.0584445	ATM/DUSP1/FBXW7	3
BP	GO:0006596	polyamine biosynthetic process	1/51	13/18670	0.0349463	0.0969593	0.0584445	SAT1	1
BP	GO:0008298	intracellular mRNA localization	1/51	13/18670	0.0349463	0.0969593	0.0584445	ZFP36	1
BP	GO:0014842	regulation of skeletal muscle satellite cell proliferation	1/51	13/18670	0.0349463	0.0969593	0.0584445	STAT3	1
BP	GO:0030656	regulation of vitamin metabolic process	1/51	13/18670	0.0349463	0.0969593	0.0584445	AKR1C3	1
BP	GO:0031650	regulation of heat generation	1/51	13/18670	0.0349463	0.0969593	0.0584445	ARRDC3	1
BP	GO:0031665	negative regulation of lipopolysaccharide-mediated signaling pathway	1/51	13/18670	0.0349463	0.0969593	0.0584445	TNFAIP3	1
BP	GO:0033004	negative regulation of mast cell activation	1/51	13/18670	0.0349463	0.0969593	0.0584445	HMOX1	1
BP	GO:0033127	regulation of histone phosphorylation	1/51	13/18670	0.0349463	0.0969593	0.0584445	ATM	1
BP	GO:0034397	telomere localization	1/51	13/18670	0.0349463	0.0969593	0.0584445	ATM	1
BP	GO:0035641	locomotory exploration behavior	1/51	13/18670	0.0349463	0.0969593	0.0584445	DPP4	1
BP	GO:0035723	interleukin-15-mediated signaling pathway	1/51	13/18670	0.0349463	0.0969593	0.0584445	STAT3	1
BP	GO:0042415	norepinephrine metabolic process	1/51	13/18670	0.0349463	0.0969593	0.0584445	EPAS1	1
BP	GO:0043201	response to leucine	1/51	13/18670	0.0349463	0.0969593	0.0584445	SESN2	1
BP	GO:0043301	negative regulation of leukocyte degranulation	1/51	13/18670	0.0349463	0.0969593	0.0584445	HMOX1	1
BP	GO:0045602	negative regulation of endothelial cell differentiation	1/51	13/18670	0.0349463	0.0969593	0.0584445	ZEB1	1
BP	GO:0045779	negative regulation of bone resorption	1/51	13/18670	0.0349463	0.0969593	0.0584445	TNFAIP3	1
BP	GO:0045820	negative regulation of glycolytic process	1/51	13/18670	0.0349463	0.0969593	0.0584445	STAT3	1
BP	GO:0048875	chemical homeostasis within a tissue	1/51	13/18670	0.0349463	0.0969593	0.0584445	EPAS1	1
BP	GO:0050713	negative regulation of interleukin-1 beta secretion	1/51	13/18670	0.0349463	0.0969593	0.0584445	TNFAIP3	1
BP	GO:0050872	white fat cell differentiation	1/51	13/18670	0.0349463	0.0969593	0.0584445	SIRT1	1
BP	GO:0061042	vascular wound healing	1/51	13/18670	0.0349463	0.0969593	0.0584445	TNFAIP3	1
BP	GO:0061052	negative regulation of cell growth involved in cardiac muscle cell development	1/51	13/18670	0.0349463	0.0969593	0.0584445	G6PD	1
BP	GO:0070914	UV-damage excision repair	1/51	13/18670	0.0349463	0.0969593	0.0584445	SIRT1	1
BP	GO:0071350	cellular response to interleukin-15	1/51	13/18670	0.0349463	0.0969593	0.0584445	STAT3	1
BP	GO:0090239	regulation of histone H4 acetylation	1/51	13/18670	0.0349463	0.0969593	0.0584445	SIRT1	1
BP	GO:0090399	replicative senescence	1/51	13/18670	0.0349463	0.0969593	0.0584445	ATM	1
BP	GO:0090594	inflammatory response to wounding	1/51	13/18670	0.0349463	0.0969593	0.0584445	HMOX1	1
BP	GO:1900225	regulation of NLRP3 inflammasome complex assembly	1/51	13/18670	0.0349463	0.0969593	0.0584445	TLR4	1
BP	GO:1903025	regulation of RNA polymerase II regulatory region sequence-specific DNA binding	1/51	13/18670	0.0349463	0.0969593	0.0584445	FBXW7	1
BP	GO:1904251	regulation of bile acid metabolic process	1/51	13/18670	0.0349463	0.0969593	0.0584445	SIRT1	1
BP	GO:0016570	histone modification	4/51	454/18670	0.0351518	0.0969593	0.0584445	ATM/MAPK8/SIRT1/JDP2	4
BP	GO:0006275	regulation of DNA replication	2/51	108/18670	0.0351723	0.0969593	0.0584445	ATG7/FBXW7	2
BP	GO:0009062	fatty acid catabolic process	2/51	108/18670	0.0351723	0.0969593	0.0584445	LPIN1/SESN2	2
BP	GO:0030004	cellular monovalent inorganic cation homeostasis	2/51	108/18670	0.0351723	0.0969593	0.0584445	MAFG/MAPK1	2
BP	GO:0032526	response to retinoic acid	2/51	108/18670	0.0351723	0.0969593	0.0584445	ATM/DUSP1	2
BP	GO:0046916	cellular transition metal ion homeostasis	2/51	108/18670	0.0351723	0.0969593	0.0584445	HMOX1/SLC40A1	2
BP	GO:0051149	positive regulation of muscle cell differentiation	2/51	109/18670	0.0357683	0.0984875	0.0593657	MAPK14/SIRT1	2
BP	GO:0002697	regulation of immune effector process	4/51	458/18670	0.0361257	0.0993562	0.0598893	MAPK14/HMOX1/TLR4/TNFAIP3	4
BP	GO:0062012	regulation of small molecule metabolic process	4/51	459/18670	0.0363716	0.0995245	0.0599908	STAT3/AKR1C3/SIRT1/SESN2	4
BP	GO:0031334	positive regulation of protein complex assembly	3/51	268/18670	0.0367549	0.0995245	0.0599908	ATM/BID/TLR4	3
BP	GO:0043491	protein kinase B signaling	3/51	269/18670	0.0370996	0.0995245	0.0599908	AKR1C3/SIRT1/SESN2	3
BP	GO:1990748	cellular detoxification	2/51	112/18670	0.0375796	0.0995245	0.0599908	TXNRD1/SESN2	2
BP	GO:0009071	serine family amino acid catabolic process	1/51	14/18670	0.0375844	0.0995245	0.0599908	CBS	1
BP	GO:0010935	regulation of macrophage cytokine production	1/51	14/18670	0.0375844	0.0995245	0.0599908	TLR4	1
BP	GO:0014841	skeletal muscle satellite cell proliferation	1/51	14/18670	0.0375844	0.0995245	0.0599908	STAT3	1
BP	GO:0014857	regulation of skeletal muscle cell proliferation	1/51	14/18670	0.0375844	0.0995245	0.0599908	STAT3	1
BP	GO:0018410	C-terminal protein amino acid modification	1/51	14/18670	0.0375844	0.0995245	0.0599908	ATG7	1
BP	GO:0031937	positive regulation of chromatin silencing	1/51	14/18670	0.0375844	0.0995245	0.0599908	SIRT1	1
BP	GO:0035020	regulation of Rac protein signal transduction	1/51	14/18670	0.0375844	0.0995245	0.0599908	KRAS	1
BP	GO:0035358	regulation of peroxisome proliferator activated receptor signaling pathway	1/51	14/18670	0.0375844	0.0995245	0.0599908	SIRT1	1
BP	GO:0036092	phosphatidylinositol-3-phosphate biosynthetic process	1/51	14/18670	0.0375844	0.0995245	0.0599908	ATM	1
BP	GO:0036295	cellular response to increased oxygen levels	1/51	14/18670	0.0375844	0.0995245	0.0599908	ATG7	1
BP	GO:0042574	retinal metabolic process	1/51	14/18670	0.0375844	0.0995245	0.0599908	AKR1C3	1
BP	GO:0044546	NLRP3 inflammasome complex assembly	1/51	14/18670	0.0375844	0.0995245	0.0599908	TLR4	1
BP	GO:0048308	organelle inheritance	1/51	14/18670	0.0375844	0.0995245	0.0599908	MAPK1	1
BP	GO:0048313	Golgi inheritance	1/51	14/18670	0.0375844	0.0995245	0.0599908	MAPK1	1
BP	GO:0050667	homocysteine metabolic process	1/51	14/18670	0.0375844	0.0995245	0.0599908	CBS	1
BP	GO:0060211	regulation of nuclear-transcribed mRNA poly(A) tail shortening	1/51	14/18670	0.0375844	0.0995245	0.0599908	ZFP36	1
BP	GO:0060397	JAK-STAT cascade involved in growth hormone signaling pathway	1/51	14/18670	0.0375844	0.0995245	0.0599908	STAT3	1
BP	GO:0071361	cellular response to ethanol	1/51	14/18670	0.0375844	0.0995245	0.0599908	CYBB	1
BP	GO:0072425	signal transduction involved in G2 DNA damage checkpoint	1/51	14/18670	0.0375844	0.0995245	0.0599908	ATM	1
BP	GO:0090231	regulation of spindle checkpoint	1/51	14/18670	0.0375844	0.0995245	0.0599908	DUSP1	1
BP	GO:0090266	regulation of mitotic cell cycle spindle assembly checkpoint	1/51	14/18670	0.0375844	0.0995245	0.0599908	DUSP1	1
BP	GO:0098543	detection of other organism	1/51	14/18670	0.0375844	0.0995245	0.0599908	TLR4	1
BP	GO:0106070	regulation of adenylate cyclase-activating G protein-coupled receptor signaling pathway	1/51	14/18670	0.0375844	0.0995245	0.0599908	ARRDC3	1
BP	GO:1903054	negative regulation of extracellular matrix organization	1/51	14/18670	0.0375844	0.0995245	0.0599908	DPP4	1
BP	GO:1903351	cellular response to dopamine	1/51	14/18670	0.0375844	0.0995245	0.0599908	MAPK1	1
BP	GO:1903504	regulation of mitotic spindle checkpoint	1/51	14/18670	0.0375844	0.0995245	0.0599908	DUSP1	1
BP	GO:1903624	regulation of DNA catabolic process	1/51	14/18670	0.0375844	0.0995245	0.0599908	ATM	1
BP	GO:2001279	regulation of unsaturated fatty acid biosynthetic process	1/51	14/18670	0.0375844	0.0995245	0.0599908	SIRT1	1
BP	GO:0008544	epidermis development	4/51	464/18670	0.0376159	0.0995245	0.0599908	ACVR1B/MAFG/ZFP36/AKR1C3	4
BP	GO:0042110	T cell activation	4/51	464/18670	0.0376159	0.0995245	0.0599908	CD44/DPP4/STAT3/ZEB1	4
BP	GO:1901617	organic hydroxy compound biosynthetic process	3/51	271/18670	0.037794	0.0998841	0.0602075	G6PD/AKR1C3/SIRT1	3
CC	GO:0101002	ficolin-1-rich granule	7/51	185/19717	4.66856e-07	8.1233e-05	5.60228e-05	ALOX5/MAPK14/IDH1/LAMP2/MAPK1/SLC2A3/ATG7	7
CC	GO:1904813	ficolin-1-rich granule lumen	5/51	124/19717	1.69061e-05	0.00147083	0.00101436	ALOX5/MAPK14/IDH1/MAPK1/ATG7	5
CC	GO:0000407	phagophore assembly site	3/51	32/19717	7.66951e-05	0.00444832	0.00306781	ULK2/ATG7/WIPI1	3
CC	GO:0000421	autophagosome membrane	3/51	36/19717	0.000109602	0.00476767	0.00328805	LAMP2/GABARAPL2/WIPI1	3
CC	GO:0005767	secondary lysosome	2/51	14/19717	0.000585177	0.0184979	0.0127572	LAMP2/NCF2	2
CC	GO:0043020	NADPH oxidase complex	2/51	15/19717	0.000674088	0.0184979	0.0127572	CYBB/NCF2	2
CC	GO:0034045	phagophore assembly site membrane	2/51	16/19717	0.000769113	0.0184979	0.0127572	ULK2/WIPI1	2
CC	GO:0070820	tertiary granule	4/51	164/19717	0.00085048	0.0184979	0.0127572	CYBB/IDH1/LAMP2/SLC2A3	4
CC	GO:0045121	membrane raft	5/51	315/19717	0.00129768	0.0195296	0.0134687	DPP4/HMOX1/KRAS/LAMP2/MAPK1	5
CC	GO:0098857	membrane microdomain	5/51	316/19717	0.001316	0.0195296	0.0134687	DPP4/HMOX1/KRAS/LAMP2/MAPK1	5
CC	GO:0034774	secretory granule lumen	5/51	321/19717	0.00141045	0.0195296	0.0134687	ALOX5/MAPK14/IDH1/MAPK1/ATG7	5
CC	GO:0031258	lamellipodium membrane	2/51	22/19717	0.00146593	0.0195296	0.0134687	CD44/DPP4	2
CC	GO:0098589	membrane region	5/51	328/19717	0.00155098	0.0195296	0.0134687	DPP4/HMOX1/KRAS/LAMP2/MAPK1	5
CC	GO:0060205	cytoplasmic vesicle lumen	5/51	338/19717	0.00176934	0.0195296	0.0134687	ALOX5/MAPK14/IDH1/MAPK1/ATG7	5
CC	GO:0031983	vesicle lumen	5/51	339/19717	0.00179236	0.0195296	0.0134687	ALOX5/MAPK14/IDH1/MAPK1/ATG7	5
CC	GO:0005776	autophagosome	3/51	93/19717	0.00179583	0.0195296	0.0134687	LAMP2/GABARAPL2/WIPI1	3
CC	GO:1902911	protein kinase complex	3/51	109/19717	0.00282222	0.0288863	0.0199216	ACVR1B/MAP3K5/SESN2	3
CC	GO:0045335	phagocytic vesicle	3/51	132/19717	0.00483138	0.0461359	0.0318179	CYBB/LAMP2/NCF2	3
CC	GO:0043204	perikaryon	3/51	134/19717	0.00503783	0.0461359	0.0318179	MAPK1/SLC2A3/KLHL24	3
CC	GO:0030667	secretory granule membrane	4/51	298/19717	0.00731735	0.0636609	0.0439041	CD44/CYBB/LAMP2/SLC2A3	4
CC	GO:0030139	endocytic vesicle	4/51	303/19717	0.00775021	0.064216	0.0442869	CYBB/DPP4/LAMP2/NCF2	4
CC	GO:0043025	neuronal cell body	5/51	497/19717	0.00903223	0.0714367	0.0492667	CYBB/ACSL4/MAPK1/SLC2A3/KLHL24	5
CC	GO:0101003	ficolin-1-rich granule membrane	2/51	61/19717	0.0108906	0.0795231	0.0548435	LAMP2/SLC2A3	2
CC	GO:0005741	mitochondrial outer membrane	3/51	178/19717	0.0109687	0.0795231	0.0548435	BID/ACSL4/LPIN1	3
CC	GO:0005819	spindle	4/51	347/19717	0.0123028	0.0856277	0.0590536	ATM/CAPG/MAPK14/MAPK1	4
CC	GO:0030027	lamellipodium	3/51	193/19717	0.0136278	0.0912012	0.0628974	CAPG/CD44/DPP4	3
CC	GO:0031968	organelle outer membrane	3/51	201/19717	0.0151834	0.0935247	0.0644998	BID/ACSL4/LPIN1	3
CC	GO:0070821	tertiary granule membrane	2/51	73/19717	0.0153349	0.0935247	0.0644998	CYBB/SLC2A3	2
CC	GO:0019867	outer membrane	3/51	203/19717	0.0155874	0.0935247	0.0644998	BID/ACSL4/LPIN1	3
CC	GO:0030670	phagocytic vesicle membrane	2/51	76/19717	0.0165488	0.0959828	0.066195	CYBB/LAMP2	2
MF	GO:0004707	MAP kinase activity	3/51	14/17697	8.02578e-06	0.00220709	0.00172343	MAPK14/MAPK1/MAPK8	3
MF	GO:0050662	coenzyme binding	7/51	291/17697	1.88474e-05	0.00259152	0.00202362	CBS/CYBB/G6PD/IDH1/PGD/TXNRD1/SIRT1	7
MF	GO:0051019	mitogen-activated protein kinase binding	3/51	26/17697	5.5945e-05	0.00512829	0.00400448	MAPK14/DUSP1/SIRT1	3
MF	GO:0004674	protein serine/threonine kinase activity	7/51	439/17697	0.000248485	0.0139521	0.0108946	ACVR1B/ATM/MAPK14/MAP3K5/MAPK1/MAPK8/ULK2	7
MF	GO:0016651	oxidoreductase activity, acting on NAD(P)H	4/51	107/17697	0.000253674	0.0139521	0.0108946	CYBB/NCF2/TXNRD1/AKR1C3	4
MF	GO:0016616	oxidoreductase activity, acting on the CH-OH group of donors, NAD or NADP as acceptor	4/51	119/17697	0.000380543	0.0145085	0.0113292	G6PD/IDH1/PGD/AKR1C3	4
MF	GO:0005536	glucose binding	2/51	11/17697	0.000440465	0.0145085	0.0113292	G6PD/SLC2A3	2
MF	GO:0050661	NADP binding	3/51	52/17697	0.000451085	0.0145085	0.0113292	G6PD/IDH1/PGD	3
MF	GO:0016614	oxidoreductase activity, acting on CH-OH group of donors	4/51	128/17697	0.000501596	0.0145085	0.0113292	G6PD/IDH1/PGD/AKR1C3	4
MF	GO:0016175	superoxide-generating NADPH oxidase activity	2/51	12/17697	0.000527584	0.0145085	0.0113292	CYBB/NCF2	2
MF	GO:0004708	MAP kinase kinase activity	2/51	16/17697	0.000952194	0.0202074	0.0157792	MAPK14/MAPK1	2
MF	GO:0035259	glucocorticoid receptor binding	2/51	16/17697	0.000952194	0.0202074	0.0157792	FLT3/STAT3	2
MF	GO:0035257	nuclear hormone receptor binding	4/51	152/17697	0.000955259	0.0202074	0.0157792	FLT3/STAT3/SIRT1/WIPI1	4
MF	GO:0050664	oxidoreductase activity, acting on NAD(P)H, oxygen as acceptor	2/51	17/17697	0.00107717	0.0211586	0.016522	CYBB/NCF2	2
MF	GO:0031625	ubiquitin protein ligase binding	5/51	290/17697	0.001448	0.0265466	0.0207292	ACVR1B/BID/CBS/GABARAPL2/FBXW7	5
MF	GO:0044389	ubiquitin-like protein ligase binding	5/51	308/17697	0.00188606	0.0300842	0.0234916	ACVR1B/BID/CBS/GABARAPL2/FBXW7	5
MF	GO:0019902	phosphatase binding	4/51	185/17697	0.00196915	0.0300842	0.0234916	MAPK14/MAP3K5/MAPK1/STAT3	4
MF	GO:0051427	hormone receptor binding	4/51	185/17697	0.00196915	0.0300842	0.0234916	FLT3/STAT3/SIRT1/WIPI1	4
MF	GO:0035258	steroid hormone receptor binding	3/51	92/17697	0.00236392	0.0342147	0.0267169	FLT3/STAT3/WIPI1	3
MF	GO:0015175	neutral amino acid transmembrane transporter activity	2/51	31/17697	0.00358929	0.0493527	0.0385376	SLC7A5/SLC38A1	2
MF	GO:0009055	electron transfer activity	3/51	114/17697	0.00433	0.0567024	0.0442767	CYBB/NCF2/TXNRD1	3
MF	GO:0016877	ligase activity, forming carbon-sulfur bonds	2/51	40/17697	0.00592206	0.0740258	0.0578039	ACSL4/ATG7	2
MF	GO:0004712	protein serine/threonine/tyrosine kinase activity	2/51	43/17697	0.00681831	0.0793122	0.0619318	MAPK14/MAPK1	2
MF	GO:0020037	heme binding	3/51	135/17697	0.00692179	0.0793122	0.0619318	CBS/CYBB/HMOX1	3
MF	GO:0019903	protein phosphatase binding	3/51	140/17697	0.00764866	0.0841352	0.0656979	MAPK14/MAP3K5/STAT3	3
MF	GO:0046906	tetrapyrrole binding	3/51	145/17697	0.00841912	0.0890484	0.0695344	CBS/CYBB/HMOX1	3
MF	GO:0045309	protein phosphorylated amino acid binding	2/51	51/17697	0.00948711	0.096628	0.075453	MAPK1/FBXW7	2
KEGG	hsa04216	Ferroptosis	6/43	41/8076	6.20903e-08	1.14867e-05	5.49009e-06	CYBB/ACSL4/HMOX1/SAT1/ATG7/SLC40A1	6
KEGG	hsa04068	FoxO signaling pathway	8/43	131/8076	3.48086e-07	3.02978e-05	1.44809e-05	ATM/MAPK14/KRAS/MAPK1/MAPK8/STAT3/GABARAPL2/SIRT1	8
KEGG	hsa04140	Autophagy - animal	8/43	137/8076	4.91315e-07	3.02978e-05	1.44809e-05	KRAS/LAMP2/MAPK1/MAPK8/ULK2/ATG7/GABARAPL2/WIPI1	8
KEGG	hsa05230	Central carbon metabolism in cancer	6/43	70/8076	1.61497e-06	7.46923e-05	3.56993e-05	FLT3/G6PD/IDH1/KRAS/MAPK1/SLC7A5	6
KEGG	hsa05167	Kaposi sarcoma-associated herpesvirus infection	8/43	193/8076	6.51316e-06	0.000240987	0.00011518	BID/MAPK14/KRAS/MAPK1/MAPK8/STAT3/ZFP36/GABARAPL2	8
KEGG	hsa04933	AGE-RAGE signaling pathway in diabetic complications	6/43	100/8076	1.30439e-05	0.000402188	0.000192227	MAPK14/CYBB/KRAS/MAPK1/MAPK8/STAT3	6
KEGG	hsa05161	Hepatitis B	7/43	162/8076	2.01493e-05	0.000506832	0.000242241	BID/MAPK14/KRAS/MAPK1/MAPK8/STAT3/TLR4	7
KEGG	hsa04136	Autophagy - other	4/43	32/8076	2.24835e-05	0.000506832	0.000242241	ULK2/ATG7/GABARAPL2/WIPI1	4
KEGG	hsa05145	Toxoplasmosis	6/43	112/8076	2.4968e-05	0.000506832	0.000242241	ALOX5/MAPK14/MAPK1/MAPK8/STAT3/TLR4	6
KEGG	hsa04664	Fc epsilon RI signaling pathway	5/43	68/8076	2.73963e-05	0.000506832	0.000242241	ALOX5/MAPK14/KRAS/MAPK1/MAPK8	5
KEGG	hsa04917	Prolactin signaling pathway	5/43	70/8076	3.15597e-05	0.000530777	0.000253686	MAPK14/KRAS/MAPK1/MAPK8/STAT3	5
KEGG	hsa04071	Sphingolipid signaling pathway	6/43	119/8076	3.52283e-05	0.000541875	0.00025899	BID/MAPK14/KRAS/MAP3K5/MAPK1/MAPK8	6
KEGG	hsa05131	Shigellosis	8/43	246/8076	3.80777e-05	0.000541875	0.00025899	ATM/CD44/MAPK14/MAPK1/MAPK8/TLR4/GABARAPL2/WIPI1	8
KEGG	hsa04621	NOD-like receptor signaling pathway	7/43	181/8076	4.12063e-05	0.000544512	0.000260251	MAPK14/CYBB/MAPK1/MAPK8/TLR4/TNFAIP3/GABARAPL2	7
KEGG	hsa05140	Leishmaniasis	5/43	77/8076	5.01229e-05	0.000618183	0.000295461	MAPK14/CYBB/NCF2/MAPK1/TLR4	5
KEGG	hsa04210	Apoptosis	6/43	136/8076	7.46012e-05	0.000862577	0.00041227	ATM/BID/KRAS/MAP3K5/MAPK1/MAPK8	6
KEGG	hsa05418	Fluid shear stress and atherosclerosis	6/43	139/8076	8.42402e-05	0.000916732	0.000438154	MAPK14/DUSP1/HMOX1/MAP3K5/NCF2/MAPK8	6
KEGG	hsa05235	PD-L1 expression and PD-1 checkpoint pathway in cancer	5/43	89/8076	0.000100451	0.00103242	0.000493446	MAPK14/KRAS/MAPK1/STAT3/TLR4	5
KEGG	hsa05170	Human immunodeficiency virus 1 infection	7/43	212/8076	0.000112207	0.00109254	0.000522181	ATM/BID/MAPK14/KRAS/MAPK1/MAPK8/TLR4	7
KEGG	hsa05022	Pathways of neurodegeneration - multiple diseases	10/43	475/8076	0.000148632	0.00135487	0.000647562	BID/MAPK14/CYBB/KRAS/MAP3K5/MAPK1/MAPK8/ULK2/GABARAPL2/WIPI1	10
KEGG	hsa04150	mTOR signaling pathway	6/43	155/8076	0.000153796	0.00135487	0.000647562	KRAS/MAPK1/SLC7A5/ULK2/LPIN1/SESN2	6
KEGG	hsa04217	Necroptosis	6/43	159/8076	0.000176832	0.00148699	0.000710711	BID/CYBB/MAPK8/STAT3/TLR4/TNFAIP3	6
KEGG	hsa05206	MicroRNAs in cancer	8/43	310/8076	0.000192939	0.0015519	0.000741732	ATM/CD44/HMOX1/KRAS/MAPK1/STAT3/ZEB1/SIRT1	8
KEGG	hsa04066	HIF-1 signaling pathway	5/43	109/8076	0.000261379	0.00201479	0.000962974	CYBB/HMOX1/MAPK1/STAT3/TLR4	5
KEGG	hsa04668	TNF signaling pathway	5/43	112/8076	0.000296627	0.00219504	0.00104912	MAPK14/MAP3K5/MAPK1/MAPK8/TNFAIP3	5
KEGG	hsa05152	Tuberculosis	6/43	180/8076	0.000346478	0.00246533	0.00117831	BID/MAPK14/LAMP2/MAPK1/MAPK8/TLR4	6
KEGG	hsa04722	Neurotrophin signaling pathway	5/43	119/8076	0.000392884	0.00259584	0.00124069	MAPK14/KRAS/MAP3K5/MAPK1/MAPK8	5
KEGG	hsa04935	Growth hormone synthesis, secretion and action	5/43	119/8076	0.000392884	0.00259584	0.00124069	MAPK14/KRAS/MAPK1/MAPK8/STAT3	5
KEGG	hsa05221	Acute myeloid leukemia	4/43	67/8076	0.000418646	0.00267067	0.00127645	FLT3/KRAS/MAPK1/STAT3	4
KEGG	hsa01524	Platinum drug resistance	4/43	73/8076	0.000580896	0.00358219	0.00171211	ATM/BID/MAP3K5/MAPK1	4
KEGG	hsa05010	Alzheimer disease	8/43	369/8076	0.000625549	0.00365826	0.00174847	BID/CYBB/KRAS/MAP3K5/MAPK1/MAPK8/ULK2/WIPI1	8
KEGG	hsa05169	Epstein-Barr virus infection	6/43	202/8076	0.000640358	0.00365826	0.00174847	BID/CD44/MAPK14/MAPK8/STAT3/TNFAIP3	6
KEGG	hsa05133	Pertussis	4/43	76/8076	0.000676851	0.00365826	0.00174847	MAPK14/MAPK1/MAPK8/TLR4	4
KEGG	hsa05212	Pancreatic cancer	4/43	76/8076	0.000676851	0.00365826	0.00174847	KRAS/MAPK1/MAPK8/STAT3	4
KEGG	hsa05205	Proteoglycans in cancer	6/43	205/8076	0.000692103	0.00365826	0.00174847	CD44/MAPK14/KRAS/MAPK1/STAT3/TLR4	6
KEGG	hsa05162	Measles	5/43	139/8076	0.000799644	0.00410928	0.00196404	BID/MAPK8/STAT3/TLR4/TNFAIP3	5
KEGG	hsa04010	MAPK signaling pathway	7/43	294/8076	0.000823453	0.00411727	0.00196785	MAPK14/DUSP1/FLT3/KRAS/MAP3K5/MAPK1/MAPK8	7
KEGG	hsa04550	Signaling pathways regulating pluripotency of stem cells	5/43	143/8076	0.000909036	0.00442557	0.00211521	ACVR1B/MAPK14/KRAS/MAPK1/STAT3	5
KEGG	hsa04218	Cellular senescence	5/43	156/8076	0.00134265	0.00636899	0.00304407	ATM/MAPK14/KRAS/MAPK1/SIRT1	5
KEGG	hsa04912	GnRH signaling pathway	4/43	93/8076	0.00144271	0.00667253	0.00318915	MAPK14/KRAS/MAPK1/MAPK8	4
KEGG	hsa04657	IL-17 signaling pathway	4/43	94/8076	0.00150104	0.00677299	0.00323716	MAPK14/MAPK1/MAPK8/TNFAIP3	4
KEGG	hsa01522	Endocrine resistance	4/43	98/8076	0.00175089	0.00771227	0.00368609	MAPK14/KRAS/MAPK1/MAPK8	4
KEGG	hsa04914	Progesterone-mediated oocyte maturation	4/43	100/8076	0.00188607	0.00811449	0.00387833	MAPK14/KRAS/MAPK1/MAPK8	4
KEGG	hsa05142	Chagas disease	4/43	102/8076	0.00202834	0.00852823	0.00407608	MAPK14/MAPK1/MAPK8/TLR4	4
KEGG	hsa04620	Toll-like receptor signaling pathway	4/43	104/8076	0.00217788	0.00857251	0.00409725	MAPK14/MAPK1/MAPK8/TLR4	4
KEGG	hsa04625	C-type lectin receptor signaling pathway	4/43	104/8076	0.00217788	0.00857251	0.00409725	MAPK14/KRAS/MAPK1/MAPK8	4
KEGG	hsa04660	T cell receptor signaling pathway	4/43	104/8076	0.00217788	0.00857251	0.00409725	MAPK14/KRAS/MAPK1/MAPK8	4
KEGG	hsa04659	Th17 cell differentiation	4/43	107/8076	0.00241626	0.00931268	0.00445101	MAPK14/MAPK1/MAPK8/STAT3	4
KEGG	hsa04726	Serotonergic synapse	4/43	115/8076	0.00313888	0.0118509	0.00566415	ALOX5/DUSP1/KRAS/MAPK1	4
KEGG	hsa00480	Glutathione metabolism	3/43	57/8076	0.00336819	0.0124623	0.00595637	G6PD/IDH1/PGD	3
KEGG	hsa04370	VEGF signaling pathway	3/43	59/8076	0.00371466	0.0134748	0.00644028	MAPK14/KRAS/MAPK1	3
KEGG	hsa04380	Osteoclast differentiation	4/43	128/8076	0.00460773	0.0163929	0.007835	MAPK14/NCF2/MAPK1/MAPK8	4
KEGG	hsa04926	Relaxin signaling pathway	4/43	129/8076	0.00473696	0.0165347	0.00790277	MAPK14/KRAS/MAPK1/MAPK8	4
KEGG	hsa04137	Mitophagy - animal	3/43	68/8076	0.00553961	0.0186912	0.00893347	KRAS/MAPK8/GABARAPL2	3
KEGG	hsa04920	Adipocytokine signaling pathway	3/43	69/8076	0.00577012	0.0186912	0.00893347	ACSL4/MAPK8/STAT3	3
KEGG	hsa05211	Renal cell carcinoma	3/43	69/8076	0.00577012	0.0186912	0.00893347	EPAS1/KRAS/MAPK1	3
KEGG	hsa05166	Human T-cell leukemia virus 1 infection	5/43	219/8076	0.00582799	0.0186912	0.00893347	ATM/KRAS/MAPK1/MAPK8/ZFP36	5
KEGG	hsa05135	Yersinia infection	4/43	137/8076	0.00585993	0.0186912	0.00893347	MAPK14/MAPK1/MAPK8/TLR4	4
KEGG	hsa05223	Non-small cell lung cancer	3/43	72/8076	0.00649594	0.0201174	0.00961514	KRAS/MAPK1/STAT3	3
KEGG	hsa05163	Human cytomegalovirus infection	5/43	225/8076	0.00652456	0.0201174	0.00961514	BID/MAPK14/KRAS/MAPK1/STAT3	5
KEGG	hsa04115	p53 signaling pathway	3/43	73/8076	0.00674944	0.0203214	0.00971266	ATM/BID/SESN2	3
KEGG	hsa05017	Spinocerebellar ataxia	4/43	143/8076	0.00681043	0.0203214	0.00971266	MAP3K5/MAPK8/ULK2/WIPI1	4
KEGG	hsa01521	EGFR tyrosine kinase inhibitor resistance	3/43	79/8076	0.00839419	0.0243397	0.0116332	KRAS/MAPK1/STAT3	3
KEGG	hsa04145	Phagosome	4/43	152/8076	0.00842021	0.0243397	0.0116332	CYBB/LAMP2/NCF2/TLR4	4
KEGG	hsa05160	Hepatitis C	4/43	157/8076	0.00941425	0.0267944	0.0128064	BID/KRAS/MAPK1/STAT3	4
KEGG	hsa04012	ErbB signaling pathway	3/43	85/8076	0.0102557	0.028747	0.0137397	KRAS/MAPK1/MAPK8	3
KEGG	hsa05210	Colorectal cancer	3/43	86/8076	0.0105874	0.0292339	0.0139724	KRAS/MAPK1/MAPK8	3
KEGG	hsa00030	Pentose phosphate pathway	2/43	30/8076	0.0109602	0.0298182	0.0142517	G6PD/PGD	2
KEGG	hsa04211	Longevity regulating pathway	3/43	89/8076	0.0116199	0.0311461	0.0148863	KRAS/SIRT1/SESN2	3
KEGG	hsa05225	Hepatocellular carcinoma	4/43	168/8076	0.0118644	0.0311461	0.0148863	HMOX1/KRAS/MAPK1/TXNRD1	4
KEGG	hsa05014	Amyotrophic lateral sclerosis	6/43	364/8076	0.0119534	0.0311461	0.0148863	BID/MAPK14/MAP3K5/ULK2/GABARAPL2/WIPI1	6
KEGG	hsa04215	Apoptosis - multiple species	2/43	32/8076	0.0124135	0.0318958	0.0152446	BID/MAPK8	2
KEGG	hsa04658	Th1 and Th2 cell differentiation	3/43	92/8076	0.0127086	0.0322068	0.0153933	MAPK14/MAPK1/MAPK8	3
KEGG	hsa05020	Prion disease	5/43	273/8076	0.0143355	0.0358388	0.0171292	MAPK14/CYBB/NCF2/MAPK1/MAPK8	5
KEGG	hsa05215	Prostate cancer	3/43	97/8076	0.0146497	0.036136	0.0172713	KRAS/MAPK1/ZEB1	3
KEGG	hsa05231	Choline metabolism in cancer	3/43	98/8076	0.0150571	0.0366521	0.0175179	KRAS/MAPK1/MAPK8	3
KEGG	hsa04960	Aldosterone-regulated sodium reabsorption	2/43	37/8076	0.0163909	0.0388759	0.0185808	KRAS/MAPK1	2
KEGG	hsa05216	Thyroid cancer	2/43	37/8076	0.0163909	0.0388759	0.0185808	KRAS/MAPK1	2
KEGG	hsa04064	NF-kappa B signaling pathway	3/43	104/8076	0.0176359	0.0412992	0.019739	ATM/TLR4/TNFAIP3	3
KEGG	hsa05219	Bladder cancer	2/43	41/8076	0.0199125	0.0460476	0.0220085	KRAS/MAPK1	2
KEGG	hsa05130	Pathogenic Escherichia coli infection	4/43	197/8076	0.0201876	0.0461074	0.0220371	MAPK14/MAPK1/MAPK8/TLR4	4
KEGG	hsa04670	Leukocyte transendothelial migration	3/43	114/8076	0.0224514	0.0506525	0.0242095	MAPK14/CYBB/NCF2	3
KEGG	hsa01200	Carbon metabolism	3/43	118/8076	0.0245597	0.0544357	0.0260176	G6PD/IDH1/PGD	3
KEGG	hsa04930	Type II diabetes mellitus	2/43	46/8076	0.0247167	0.0544357	0.0260176	MAPK1/MAPK8	2
KEGG	hsa04913	Ovarian steroidogenesis	2/43	51/8076	0.0299442	0.0651728	0.0311494	ALOX5/AKR1C3	2
KEGG	hsa04650	Natural killer cell mediated cytotoxicity	3/43	131/8076	0.03213	0.0691169	0.0330346	BID/KRAS/MAPK1	3
KEGG	hsa04714	Thermogenesis	4/43	231/8076	0.0336839	0.0716267	0.0342341	MAPK14/ACSL4/KRAS/MAP3K5	4
KEGG	hsa04014	Ras signaling pathway	4/43	232/8076	0.0341449	0.0717818	0.0343082	FLT3/KRAS/MAPK1/MAPK8	4
KEGG	hsa04371	Apelin signaling pathway	3/43	137/8076	0.0359927	0.0739851	0.0353613	KRAS/MAPK1/GABARAPL2	3
KEGG	hsa04910	Insulin signaling pathway	3/43	137/8076	0.0359927	0.0739851	0.0353613	KRAS/MAPK1/MAPK8	3
KEGG	hsa05213	Endometrial cancer	2/43	58/8076	0.0379272	0.0771048	0.0368524	KRAS/MAPK1	2
KEGG	hsa04978	Mineral absorption	2/43	59/8076	0.0391277	0.0786807	0.0376056	HMOX1/SLC40A1	2
KEGG	hsa04730	Long-term depression	2/43	60/8076	0.0403426	0.0802514	0.0383563	KRAS/MAPK1	2
KEGG	hsa05132	Salmonella infection	4/43	249/8076	0.042552	0.0833766	0.03985	MAPK14/MAPK1/MAPK8/TLR4	4
KEGG	hsa04213	Longevity regulating pathway - multiple species	2/43	62/8076	0.042815	0.0833766	0.03985	KRAS/SIRT1	2
KEGG	hsa04723	Retrograde endocannabinoid signaling	3/43	148/8076	0.043671	0.0840552	0.0401743	MAPK14/MAPK1/MAPK8	3
KEGG	hsa00590	Arachidonic acid metabolism	2/43	63/8076	0.0440722	0.0840552	0.0401743	ALOX5/AKR1C3	2
KEGG	hsa04932	Non-alcoholic fatty liver disease	3/43	150/8076	0.045149	0.084732	0.0404978	BID/MAP3K5/MAPK8	3
KEGG	hsa04929	GnRH secretion	2/43	64/8076	0.0453431	0.084732	0.0404978	KRAS/MAPK1	2
KEGG	hsa05321	Inflammatory bowel disease	2/43	65/8076	0.0466276	0.086261	0.0412286	STAT3/TLR4	2
KEGG	hsa04720	Long-term potentiation	2/43	67/8076	0.0492365	0.0901858	0.0431044	KRAS/MAPK1	2
KEGG	hsa04622	RIG-I-like receptor signaling pathway	2/43	70/8076	0.0532475	0.0956387	0.0457107	MAPK14/MAPK8	2
KEGG	hsa05120	Epithelial cell signaling in Helicobacter pylori infection	2/43	70/8076	0.0532475	0.0956387	0.0457107	MAPK14/MAPK8	2
KEGG	hsa05218	Melanoma	2/43	72/8076	0.0559845	0.0995877	0.0475981	KRAS/MAPK1	2
