# Supplementary material for: Identification of WIPI1 as A Potential Ferroptosis-Related Biomarker in Sepsis and Validation in CLP Mice Model.
Source: Research Square preprint supplement (doi:10.21203/rs.3.rs-1014586/v1), 2021-10-28
Supplement: Supplementary file 7 [file 3e9910637413f1d99ab4d841.xlsx]

## Sheet: GSEA report
NAME	GS<br> follow link to MSigDB	GS DETAILS	SIZE	ES	NES	NOM p-val	FDR q-val	FWER p-val	RANK AT MAX	LEADING EDGE
KEGG_STARCH_AND_SUCROSE_METABOLISM	KEGG_STARCH_AND_SUCROSE_METABOLISM	Details ...	36	-0.649495	-2.25002	0	0.000929032	0.001	2170	tags=28%, list=10%, signal=31%
KEGG_FC_GAMMA_R_MEDIATED_PHAGOCYTOSIS	KEGG_FC_GAMMA_R_MEDIATED_PHAGOCYTOSIS	Details ...	93	-0.601136	-1.99503	0	0.0204843	0.021	2862	tags=47%, list=14%, signal=55%
KEGG_PENTOSE_PHOSPHATE_PATHWAY	KEGG_PENTOSE_PHOSPHATE_PATHWAY	Details ...	25	-0.708996	-1.9365	0	0.0268646	0.041	1513	tags=44%, list=7%, signal=47%
KEGG_PANTOTHENATE_AND_COA_BIOSYNTHESIS	KEGG_PANTOTHENATE_AND_COA_BIOSYNTHESIS	Details ...	16	-0.729643	-1.88672	0	0.0418983	0.076	3525	tags=63%, list=17%, signal=75%
KEGG_PATHOGENIC_ESCHERICHIA_COLI_INFECTION	KEGG_PATHOGENIC_ESCHERICHIA_COLI_INFECTION	Details ...	51	-0.628874	-1.88185	0.00202429	0.0350945	0.078	3743	tags=53%, list=18%, signal=64%
KEGG_GLYCOLYSIS_GLUCONEOGENESIS	KEGG_GLYCOLYSIS_GLUCONEOGENESIS	Details ...	61	-0.513584	-1.87703	0.00205339	0.0310985	0.084	2489	tags=25%, list=12%, signal=28%
KEGG_INSULIN_SIGNALING_PATHWAY	KEGG_INSULIN_SIGNALING_PATHWAY	Details ...	134	-0.474874	-1.85755	0.00200401	0.0311655	0.099	3235	tags=31%, list=16%, signal=37%
KEGG_GALACTOSE_METABOLISM	KEGG_GALACTOSE_METABOLISM	Details ...	25	-0.598209	-1.84968	0.00594059	0.0319981	0.112	352	tags=20%, list=2%, signal=20%
KEGG_EPITHELIAL_CELL_SIGNALING_IN_HELICOBACTER_PYLORI_INFECTION	KEGG_EPITHELIAL_CELL_SIGNALING_IN_HELICOBACTER_PYLORI_INFECTION	Details ...	67	-0.54287	-1.79512	0.0158103	0.0533258	0.183	2862	tags=45%, list=14%, signal=52%
KEGG_FC_EPSILON_RI_SIGNALING_PATHWAY	KEGG_FC_EPSILON_RI_SIGNALING_PATHWAY	Details ...	73	-0.514236	-1.79146	0.00398406	0.0497538	0.186	2985	tags=41%, list=14%, signal=48%
KEGG_LEUKOCYTE_TRANSENDOTHELIAL_MIGRATION	KEGG_LEUKOCYTE_TRANSENDOTHELIAL_MIGRATION		113	-0.462249	-1.78388	0.004	0.0472348	0.194	3191	tags=33%, list=15%, signal=38%
KEGG_VIBRIO_CHOLERAE_INFECTION	KEGG_VIBRIO_CHOLERAE_INFECTION		52	-0.527074	-1.78281	0.0040568	0.0436748	0.195	3620	tags=48%, list=17%, signal=58%
KEGG_AMINO_SUGAR_AND_NUCLEOTIDE_SUGAR_METABOLISM	KEGG_AMINO_SUGAR_AND_NUCLEOTIDE_SUGAR_METABOLISM		41	-0.606584	-1.78123	0	0.0409309	0.196	4603	tags=54%, list=22%, signal=69%
KEGG_REGULATION_OF_ACTIN_CYTOSKELETON	KEGG_REGULATION_OF_ACTIN_CYTOSKELETON		209	-0.42263	-1.77962	0.00194932	0.0380787	0.196	3262	tags=30%, list=16%, signal=35%
KEGG_FRUCTOSE_AND_MANNOSE_METABOLISM	KEGG_FRUCTOSE_AND_MANNOSE_METABOLISM		32	-0.553208	-1.765	0.0139442	0.0402644	0.215	746	tags=22%, list=4%, signal=23%
KEGG_LYSOSOME	KEGG_LYSOSOME		116	-0.536762	-1.76072	0.0184805	0.0394448	0.226	4250	tags=49%, list=20%, signal=61%
KEGG_B_CELL_RECEPTOR_SIGNALING_PATHWAY	KEGG_B_CELL_RECEPTOR_SIGNALING_PATHWAY		75	-0.572127	-1.75438	0.0100806	0.0397277	0.242	2776	tags=40%, list=13%, signal=46%
KEGG_ENDOCYTOSIS	KEGG_ENDOCYTOSIS		173	-0.443967	-1.7471	0.0115607	0.0411147	0.262	4489	tags=40%, list=22%, signal=50%
KEGG_TYPE_II_DIABETES_MELLITUS	KEGG_TYPE_II_DIABETES_MELLITUS		45	-0.475553	-1.7459	0.00414079	0.0390767	0.263	2845	tags=27%, list=14%, signal=31%
KEGG_SPHINGOLIPID_METABOLISM	KEGG_SPHINGOLIPID_METABOLISM		35	-0.538765	-1.73006	0.00796813	0.0425138	0.292	3192	tags=43%, list=15%, signal=51%
KEGG_SNARE_INTERACTIONS_IN_VESICULAR_TRANSPORT	KEGG_SNARE_INTERACTIONS_IN_VESICULAR_TRANSPORT		38	-0.638083	-1.7142	0.00208768	0.0485108	0.329	4383	tags=63%, list=21%, signal=80%
KEGG_GLYCEROPHOSPHOLIPID_METABOLISM	KEGG_GLYCEROPHOSPHOLIPID_METABOLISM		71	-0.456978	-1.68646	0.00625	0.059336	0.377	4230	tags=41%, list=20%, signal=51%
KEGG_PROGESTERONE_MEDIATED_OOCYTE_MATURATION	KEGG_PROGESTERONE_MEDIATED_OOCYTE_MATURATION		83	-0.434997	-1.67718	0.00204918	0.0620798	0.399	3062	tags=30%, list=15%, signal=35%
KEGG_TOLL_LIKE_RECEPTOR_SIGNALING_PATHWAY	KEGG_TOLL_LIKE_RECEPTOR_SIGNALING_PATHWAY		97	-0.495637	-1.67337	0.0196078	0.0615274	0.406	3425	tags=38%, list=16%, signal=45%
KEGG_NEUROTROPHIN_SIGNALING_PATHWAY	KEGG_NEUROTROPHIN_SIGNALING_PATHWAY		123	-0.476199	-1.67061	0.010101	0.0604569	0.41	3709	tags=43%, list=18%, signal=52%
KEGG_LEISHMANIA_INFECTION	KEGG_LEISHMANIA_INFECTION		68	-0.537771	-1.66283	0.0306748	0.0619047	0.429	2191	tags=37%, list=11%, signal=41%
KEGG_RENAL_CELL_CARCINOMA	KEGG_RENAL_CELL_CARCINOMA		67	-0.456793	-1.66215	0.011811	0.0597419	0.429	3082	tags=36%, list=15%, signal=42%
KEGG_AMYOTROPHIC_LATERAL_SCLEROSIS_ALS	KEGG_AMYOTROPHIC_LATERAL_SCLEROSIS_ALS		52	-0.458587	-1.65781	0.0138067	0.0597547	0.44	3097	tags=33%, list=15%, signal=38%
KEGG_NOD_LIKE_RECEPTOR_SIGNALING_PATHWAY	KEGG_NOD_LIKE_RECEPTOR_SIGNALING_PATHWAY		61	-0.513899	-1.63894	0.0282258	0.0673718	0.486	5165	tags=54%, list=25%, signal=72%
KEGG_VEGF_SIGNALING_PATHWAY	KEGG_VEGF_SIGNALING_PATHWAY		71	-0.434763	-1.62847	0.00982318	0.0708283	0.503	2776	tags=30%, list=13%, signal=34%
KEGG_ALZHEIMERS_DISEASE	KEGG_ALZHEIMERS_DISEASE		138	-0.429572	-1.62543	0.01002	0.0703023	0.508	4099	tags=37%, list=20%, signal=46%
KEGG_CHEMOKINE_SIGNALING_PATHWAY	KEGG_CHEMOKINE_SIGNALING_PATHWAY		180	-0.409565	-1.6223	0.01341	0.0702557	0.518	3151	tags=31%, list=15%, signal=36%
KEGG_ADIPOCYTOKINE_SIGNALING_PATHWAY	KEGG_ADIPOCYTOKINE_SIGNALING_PATHWAY		66	-0.445787	-1.62045	0.0202429	0.0690705	0.52	3235	tags=32%, list=16%, signal=38%
KEGG_BASAL_TRANSCRIPTION_FACTORS	KEGG_BASAL_TRANSCRIPTION_FACTORS		32	-0.608939	-1.60768	0.0224033	0.0751123	0.544	4379	tags=53%, list=21%, signal=67%
KEGG_APOPTOSIS	KEGG_APOPTOSIS		87	-0.456421	-1.5976	0.0197628	0.0792612	0.561	2929	tags=33%, list=14%, signal=39%
KEGG_GLYCOSYLPHOSPHATIDYLINOSITOL_GPI_ANCHOR_BIOSYNTHESIS	KEGG_GLYCOSYLPHOSPHATIDYLINOSITOL_GPI_ANCHOR_BIOSYNTHESIS		24	-0.591467	-1.59378	0.0252101	0.0797763	0.57	4031	tags=54%, list=19%, signal=67%
KEGG_CHRONIC_MYELOID_LEUKEMIA	KEGG_CHRONIC_MYELOID_LEUKEMIA		72	-0.468238	-1.59019	0.0295276	0.0803712	0.584	3121	tags=38%, list=15%, signal=44%
KEGG_GLYCEROLIPID_METABOLISM	KEGG_GLYCEROLIPID_METABOLISM		48	-0.45157	-1.58958	0.0126316	0.0786921	0.586	1557	tags=23%, list=7%, signal=25%
KEGG_LONG_TERM_POTENTIATION	KEGG_LONG_TERM_POTENTIATION		68	-0.412676	-1.58058	0.0221328	0.082962	0.608	2718	tags=28%, list=13%, signal=32%
KEGG_OXIDATIVE_PHOSPHORYLATION	KEGG_OXIDATIVE_PHOSPHORYLATION		95	-0.490514	-1.57612	0.0448065	0.0841855	0.621	3643	tags=39%, list=17%, signal=47%
KEGG_OOCYTE_MEIOSIS	KEGG_OOCYTE_MEIOSIS		108	-0.393803	-1.57604	0.0164271	0.0821548	0.621	3690	tags=31%, list=18%, signal=37%
KEGG_NICOTINATE_AND_NICOTINAMIDE_METABOLISM	KEGG_NICOTINATE_AND_NICOTINAMIDE_METABOLISM		23	-0.462621	-1.56525	0.0147368	0.0872636	0.65	2969	tags=30%, list=14%, signal=35%
KEGG_MAPK_SIGNALING_PATHWAY	KEGG_MAPK_SIGNALING_PATHWAY		254	-0.355547	-1.55525	0.00782779	0.092143	0.677	3135	tags=27%, list=15%, signal=31%
KEGG_NATURAL_KILLER_CELL_MEDIATED_CYTOTOXICITY	KEGG_NATURAL_KILLER_CELL_MEDIATED_CYTOTOXICITY		128	-0.416867	-1.54659	0.036	0.0955414	0.697	3300	tags=35%, list=16%, signal=42%
KEGG_MTOR_SIGNALING_PATHWAY	KEGG_MTOR_SIGNALING_PATHWAY		50	-0.481818	-1.54064	0.0204918	0.09772	0.713	2776	tags=32%, list=13%, signal=37%
KEGG_ACUTE_MYELOID_LEUKEMIA	KEGG_ACUTE_MYELOID_LEUKEMIA		56	-0.492156	-1.53849	0.0465587	0.0969805	0.716	2776	tags=34%, list=13%, signal=39%
KEGG_VASOPRESSIN_REGULATED_WATER_REABSORPTION	KEGG_VASOPRESSIN_REGULATED_WATER_REABSORPTION		43	-0.421511	-1.53216	0.0182186	0.0997834	0.729	3614	tags=40%, list=17%, signal=48%
KEGG_DRUG_METABOLISM_OTHER_ENZYMES	KEGG_DRUG_METABOLISM_OTHER_ENZYMES		37	-0.420127	-1.53184	0.0265306	0.098007	0.73	2721	tags=24%, list=13%, signal=28%
KEGG_BLADDER_CANCER	KEGG_BLADDER_CANCER		41	-0.460294	-1.53094	0.0275049	0.0966271	0.73	2789	tags=29%, list=13%, signal=34%
KEGG_PANCREATIC_CANCER	KEGG_PANCREATIC_CANCER		69	-0.464633	-1.52745	0.046748	0.0973954	0.737	3186	tags=33%, list=15%, signal=39%
KEGG_PROSTATE_CANCER	KEGG_PROSTATE_CANCER		89	-0.380949	-1.52295	0.0202429	0.0989618	0.746	3025	tags=28%, list=15%, signal=33%
KEGG_PARKINSONS_DISEASE	KEGG_PARKINSONS_DISEASE		93	-0.487298	-1.52089	0.0748441	0.0981509	0.75	5080	tags=49%, list=24%, signal=65%
KEGG_PROTEASOME	KEGG_PROTEASOME		40	-0.684699	-1.51575	0.0618557	0.100151	0.759	4056	tags=68%, list=19%, signal=84%
KEGG_FATTY_ACID_METABOLISM	KEGG_FATTY_ACID_METABOLISM		40	-0.490874	-1.51118	0.0529661	0.101718	0.77	3797	tags=38%, list=18%, signal=46%
KEGG_UBIQUITIN_MEDIATED_PROTEOLYSIS	KEGG_UBIQUITIN_MEDIATED_PROTEOLYSIS		125	-0.45464	-1.50962	0.0305011	0.101256	0.775	4010	tags=38%, list=19%, signal=46%
KEGG_PEROXISOME	KEGG_PEROXISOME		77	-0.455418	-1.50723	0.0313808	0.100858	0.777	3354	tags=36%, list=16%, signal=43%
KEGG_GLYCOSAMINOGLYCAN_BIOSYNTHESIS_CHONDROITIN_SULFATE	KEGG_GLYCOSAMINOGLYCAN_BIOSYNTHESIS_CHONDROITIN_SULFATE		22	-0.479352	-1.50182	0.048583	0.102916	0.79	1688	tags=27%, list=8%, signal=30%
KEGG_GLYCOSPHINGOLIPID_BIOSYNTHESIS_GLOBO_SERIES	KEGG_GLYCOSPHINGOLIPID_BIOSYNTHESIS_GLOBO_SERIES		14	-0.520493	-1.48939	0.0605428	0.110329	0.818	2285	tags=29%, list=11%, signal=32%
KEGG_PROPANOATE_METABOLISM	KEGG_PROPANOATE_METABOLISM		31	-0.493909	-1.48014	0.0684327	0.115584	0.829	3797	tags=39%, list=18%, signal=47%
KEGG_LYSINE_DEGRADATION	KEGG_LYSINE_DEGRADATION		42	-0.452549	-1.47065	0.0766129	0.121197	0.844	3657	tags=33%, list=18%, signal=40%
KEGG_JAK_STAT_SIGNALING_PATHWAY	KEGG_JAK_STAT_SIGNALING_PATHWAY		152	-0.350333	-1.46764	0.0375494	0.121415	0.847	2982	tags=23%, list=14%, signal=27%
KEGG_LONG_TERM_DEPRESSION	KEGG_LONG_TERM_DEPRESSION		62	-0.380188	-1.4648	0.0363985	0.121992	0.85	2718	tags=26%, list=13%, signal=30%
KEGG_NON_SMALL_CELL_LUNG_CANCER	KEGG_NON_SMALL_CELL_LUNG_CANCER		54	-0.423718	-1.44863	0.0633663	0.132939	0.866	3188	tags=31%, list=15%, signal=37%
KEGG_OTHER_GLYCAN_DEGRADATION	KEGG_OTHER_GLYCAN_DEGRADATION		14	-0.556273	-1.4478	0.0943775	0.131552	0.867	2512	tags=50%, list=12%, signal=57%
KEGG_ETHER_LIPID_METABOLISM	KEGG_ETHER_LIPID_METABOLISM		28	-0.44092	-1.4444	0.0511811	0.132033	0.871	2689	tags=32%, list=13%, signal=37%
KEGG_ADHERENS_JUNCTION	KEGG_ADHERENS_JUNCTION		71	-0.384924	-1.43473	0.0700637	0.138362	0.88	3727	tags=32%, list=18%, signal=39%
KEGG_P53_SIGNALING_PATHWAY	KEGG_P53_SIGNALING_PATHWAY		66	-0.379463	-1.43414	0.0375783	0.136765	0.881	4156	tags=33%, list=20%, signal=42%
KEGG_RIG_I_LIKE_RECEPTOR_SIGNALING_PATHWAY	KEGG_RIG_I_LIKE_RECEPTOR_SIGNALING_PATHWAY		69	-0.41516	-1.42919	0.0770791	0.13896	0.888	5165	tags=42%, list=25%, signal=56%
KEGG_NOTCH_SIGNALING_PATHWAY	KEGG_NOTCH_SIGNALING_PATHWAY		46	-0.412089	-1.41964	0.0588235	0.145416	0.897	3533	tags=37%, list=17%, signal=44%
KEGG_CELL_CYCLE	KEGG_CELL_CYCLE		122	-0.43776	-1.41641	0.130252	0.145815	0.905	5255	tags=47%, list=25%, signal=62%
KEGG_PROTEIN_EXPORT	KEGG_PROTEIN_EXPORT		23	-0.620396	-1.41421	0.128151	0.145648	0.907	4255	tags=57%, list=20%, signal=71%
KEGG_O_GLYCAN_BIOSYNTHESIS	KEGG_O_GLYCAN_BIOSYNTHESIS		28	-0.415928	-1.40827	0.0983936	0.148241	0.911	1731	tags=21%, list=8%, signal=23%
KEGG_SULFUR_METABOLISM	KEGG_SULFUR_METABOLISM		11	-0.552292	-1.40169	0.0985916	0.151864	0.913	3481	tags=45%, list=17%, signal=55%
KEGG_HUNTINGTONS_DISEASE	KEGG_HUNTINGTONS_DISEASE		152	-0.381062	-1.38223	0.102669	0.167015	0.931	4770	tags=38%, list=23%, signal=49%
KEGG_ENDOMETRIAL_CANCER	KEGG_ENDOMETRIAL_CANCER		52	-0.401489	-1.38204	0.0773931	0.164956	0.931	2776	tags=29%, list=13%, signal=33%
KEGG_BIOSYNTHESIS_OF_UNSATURATED_FATTY_ACIDS	KEGG_BIOSYNTHESIS_OF_UNSATURATED_FATTY_ACIDS		19	-0.460941	-1.37702	0.106157	0.167427	0.934	2139	tags=32%, list=10%, signal=35%
KEGG_COLORECTAL_CANCER	KEGG_COLORECTAL_CANCER		62	-0.440112	-1.37084	0.107368	0.171292	0.937	4851	tags=47%, list=23%, signal=61%
KEGG_REGULATION_OF_AUTOPHAGY	KEGG_REGULATION_OF_AUTOPHAGY		32	-0.429677	-1.35675	0.153535	0.182705	0.947	2106	tags=22%, list=10%, signal=24%
KEGG_CYTOSOLIC_DNA_SENSING_PATHWAY	KEGG_CYTOSOLIC_DNA_SENSING_PATHWAY		51	-0.410806	-1.34949	0.151329	0.187754	0.95	5165	tags=45%, list=25%, signal=60%
KEGG_GAP_JUNCTION	KEGG_GAP_JUNCTION		84	-0.356285	-1.34911	0.0770713	0.185727	0.952	2953	tags=24%, list=14%, signal=28%
KEGG_THYROID_CANCER	KEGG_THYROID_CANCER		29	-0.438017	-1.34843	0.104255	0.18407	0.952	4110	tags=41%, list=20%, signal=51%
KEGG_PATHWAYS_IN_CANCER	KEGG_PATHWAYS_IN_CANCER		318	-0.28445	-1.34557	0.0322581	0.18483	0.954	3188	tags=21%, list=15%, signal=24%
KEGG_GLUTATHIONE_METABOLISM	KEGG_GLUTATHIONE_METABOLISM		47	-0.390869	-1.34354	0.127615	0.184404	0.954	2129	tags=21%, list=10%, signal=24%
KEGG_PPAR_SIGNALING_PATHWAY	KEGG_PPAR_SIGNALING_PATHWAY		66	-0.363196	-1.33725	0.0901639	0.188037	0.955	2452	tags=23%, list=12%, signal=26%
KEGG_T_CELL_RECEPTOR_SIGNALING_PATHWAY	KEGG_T_CELL_RECEPTOR_SIGNALING_PATHWAY		108	-0.376526	-1.33065	0.133874	0.192789	0.957	2985	tags=31%, list=14%, signal=35%
KEGG_MELANOMA	KEGG_MELANOMA		71	-0.341353	-1.3284	0.0636183	0.192583	0.957	2776	tags=21%, list=13%, signal=24%
KEGG_GLYCOSAMINOGLYCAN_DEGRADATION	KEGG_GLYCOSAMINOGLYCAN_DEGRADATION		20	-0.44134	-1.30137	0.139113	0.218503	0.969	3775	tags=40%, list=18%, signal=49%
KEGG_SYSTEMIC_LUPUS_ERYTHEMATOSUS	KEGG_SYSTEMIC_LUPUS_ERYTHEMATOSUS		96	-0.352017	-1.28419	0.163265	0.234259	0.971	4371	tags=40%, list=21%, signal=50%
KEGG_ERBB_SIGNALING_PATHWAY	KEGG_ERBB_SIGNALING_PATHWAY		87	-0.333979	-1.27818	0.136986	0.238188	0.972	2923	tags=28%, list=14%, signal=32%
KEGG_DORSO_VENTRAL_AXIS_FORMATION	KEGG_DORSO_VENTRAL_AXIS_FORMATION		23	-0.417205	-1.26876	0.157258	0.246451	0.974	2718	tags=30%, list=13%, signal=35%
KEGG_INOSITOL_PHOSPHATE_METABOLISM	KEGG_INOSITOL_PHOSPHATE_METABOLISM		54	-0.330822	-1.24813	0.13556	0.268514	0.978	3966	tags=30%, list=19%, signal=37%
KEGG_SPLICEOSOME	KEGG_SPLICEOSOME		116	-0.467342	-1.2476	0.275641	0.26618	0.978	4891	tags=46%, list=23%, signal=59%
KEGG_BETA_ALANINE_METABOLISM	KEGG_BETA_ALANINE_METABOLISM		22	-0.423645	-1.24351	0.202811	0.268233	0.978	3797	tags=36%, list=18%, signal=44%
KEGG_RIBOFLAVIN_METABOLISM	KEGG_RIBOFLAVIN_METABOLISM		15	-0.438511	-1.23376	0.198783	0.276766	0.979	1778	tags=20%, list=9%, signal=22%
KEGG_VALINE_LEUCINE_AND_ISOLEUCINE_DEGRADATION	KEGG_VALINE_LEUCINE_AND_ISOLEUCINE_DEGRADATION		43	-0.418907	-1.20298	0.285097	0.313235	0.985	3797	tags=37%, list=18%, signal=45%
KEGG_GLIOMA	KEGG_GLIOMA		63	-0.313987	-1.202	0.183206	0.31128	0.985	2776	tags=24%, list=13%, signal=27%
KEGG_GNRH_SIGNALING_PATHWAY	KEGG_GNRH_SIGNALING_PATHWAY		92	-0.317001	-1.19799	0.181287	0.313247	0.986	3105	tags=25%, list=15%, signal=29%
KEGG_N_GLYCAN_BIOSYNTHESIS	KEGG_N_GLYCAN_BIOSYNTHESIS		44	-0.439859	-1.19521	0.301969	0.313182	0.986	4654	tags=43%, list=22%, signal=55%
KEGG_WNT_SIGNALING_PATHWAY	KEGG_WNT_SIGNALING_PATHWAY		146	-0.263143	-1.17195	0.180698	0.340769	0.989	3306	tags=21%, list=16%, signal=24%
KEGG_FOCAL_ADHESION	KEGG_FOCAL_ADHESION		195	-0.274939	-1.17081	0.205029	0.338992	0.989	3151	tags=21%, list=15%, signal=24%
KEGG_CITRATE_CYCLE_TCA_CYCLE	KEGG_CITRATE_CYCLE_TCA_CYCLE		30	-0.432199	-1.16664	0.329114	0.341193	0.989	5341	tags=57%, list=26%, signal=76%
KEGG_FOLATE_BIOSYNTHESIS	KEGG_FOLATE_BIOSYNTHESIS		10	-0.455047	-1.16432	0.262195	0.341126	0.989	4346	tags=50%, list=21%, signal=63%
KEGG_SMALL_CELL_LUNG_CANCER	KEGG_SMALL_CELL_LUNG_CANCER		84	-0.28371	-1.16374	0.225	0.338509	0.989	5316	tags=32%, list=26%, signal=43%
KEGG_STEROID_BIOSYNTHESIS	KEGG_STEROID_BIOSYNTHESIS		16	-0.412364	-1.14996	0.298625	0.353094	0.99	3975	tags=44%, list=19%, signal=54%
KEGG_NON_HOMOLOGOUS_END_JOINING	KEGG_NON_HOMOLOGOUS_END_JOINING		11	-0.455194	-1.14763	0.296371	0.352806	0.99	4741	tags=45%, list=23%, signal=59%
KEGG_CIRCADIAN_RHYTHM_MAMMAL	KEGG_CIRCADIAN_RHYTHM_MAMMAL		11	-0.463927	-1.13402	0.309665	0.367387	0.995	4978	tags=36%, list=24%, signal=48%
KEGG_TERPENOID_BACKBONE_BIOSYNTHESIS	KEGG_TERPENOID_BACKBONE_BIOSYNTHESIS		15	-0.423199	-1.12582	0.351626	0.375408	0.996	5425	tags=67%, list=26%, signal=90%
KEGG_RNA_DEGRADATION	KEGG_RNA_DEGRADATION		54	-0.4177	-1.11391	0.390658	0.388716	0.996	4756	tags=43%, list=23%, signal=55%
KEGG_HEMATOPOIETIC_CELL_LINEAGE	KEGG_HEMATOPOIETIC_CELL_LINEAGE		84	-0.272728	-1.10861	0.277445	0.392513	0.998	1413	tags=12%, list=7%, signal=13%
KEGG_PYRIMIDINE_METABOLISM	KEGG_PYRIMIDINE_METABOLISM		92	-0.334131	-1.0981	0.353556	0.404543	0.998	5045	tags=32%, list=24%, signal=41%
KEGG_PHOSPHATIDYLINOSITOL_SIGNALING_SYSTEM	KEGG_PHOSPHATIDYLINOSITOL_SIGNALING_SYSTEM		74	-0.279451	-1.06761	0.339114	0.444048	0.999	4990	tags=34%, list=24%, signal=44%
KEGG_TIGHT_JUNCTION	KEGG_TIGHT_JUNCTION		129	-0.248436	-1.0534	0.346076	0.461474	0.999	2943	tags=16%, list=14%, signal=19%
KEGG_CYTOKINE_CYTOKINE_RECEPTOR_INTERACTION	KEGG_CYTOKINE_CYTOKINE_RECEPTOR_INTERACTION		249	-0.251407	-1.05071	0.36965	0.46189	0.999	2832	tags=17%, list=14%, signal=20%
KEGG_PYRUVATE_METABOLISM	KEGG_PYRUVATE_METABOLISM		39	-0.322964	-1.05058	0.387164	0.457996	0.999	3016	tags=18%, list=14%, signal=21%
KEGG_GLYCOSPHINGOLIPID_BIOSYNTHESIS_GANGLIO_SERIES	KEGG_GLYCOSPHINGOLIPID_BIOSYNTHESIS_GANGLIO_SERIES		14	-0.356051	-1.04884	0.384615	0.456635	0.999	1590	tags=21%, list=8%, signal=23%
KEGG_BASE_EXCISION_REPAIR	KEGG_BASE_EXCISION_REPAIR		32	-0.402059	-1.04539	0.423237	0.457784	0.999	5063	tags=41%, list=24%, signal=54%
KEGG_AXON_GUIDANCE	KEGG_AXON_GUIDANCE		129	-0.244852	-1.03339	0.406439	0.472	1	2862	tags=17%, list=14%, signal=20%
KEGG_VALINE_LEUCINE_AND_ISOLEUCINE_BIOSYNTHESIS	KEGG_VALINE_LEUCINE_AND_ISOLEUCINE_BIOSYNTHESIS		11	-0.459647	-1.02149	0.448347	0.48615	1	5708	tags=55%, list=27%, signal=75%
KEGG_GLYCOSAMINOGLYCAN_BIOSYNTHESIS_HEPARAN_SULFATE	KEGG_GLYCOSAMINOGLYCAN_BIOSYNTHESIS_HEPARAN_SULFATE		26	-0.296352	-1.00644	0.458167	0.506285	1	4244	tags=31%, list=20%, signal=39%
KEGG_NUCLEOTIDE_EXCISION_REPAIR	KEGG_NUCLEOTIDE_EXCISION_REPAIR		43	-0.367851	-0.956468	0.521368	0.580355	1	5026	tags=44%, list=24%, signal=58%
KEGG_STEROID_HORMONE_BIOSYNTHESIS	KEGG_STEROID_HORMONE_BIOSYNTHESIS		41	-0.260461	-0.948838	0.503937	0.58854	1	1932	tags=12%, list=9%, signal=13%
KEGG_ALDOSTERONE_REGULATED_SODIUM_REABSORPTION	KEGG_ALDOSTERONE_REGULATED_SODIUM_REABSORPTION		41	-0.283331	-0.947251	0.508772	0.586379	1	2776	tags=22%, list=13%, signal=25%
KEGG_VASCULAR_SMOOTH_MUSCLE_CONTRACTION	KEGG_VASCULAR_SMOOTH_MUSCLE_CONTRACTION		104	-0.258237	-0.936823	0.600406	0.599209	1	2953	tags=20%, list=14%, signal=23%
KEGG_HOMOLOGOUS_RECOMBINATION	KEGG_HOMOLOGOUS_RECOMBINATION		26	-0.322819	-0.918403	0.530938	0.625494	1	6005	tags=38%, list=29%, signal=54%
KEGG_PURINE_METABOLISM	KEGG_PURINE_METABOLISM		147	-0.221979	-0.909435	0.564	0.636044	1	3202	tags=17%, list=15%, signal=20%
KEGG_PRIMARY_BILE_ACID_BIOSYNTHESIS	KEGG_PRIMARY_BILE_ACID_BIOSYNTHESIS		16	-0.300062	-0.896374	0.602386	0.653704	1	1681	tags=19%, list=8%, signal=20%
KEGG_MELANOGENESIS	KEGG_MELANOGENESIS		96	-0.236976	-0.886598	0.661224	0.664901	1	3025	tags=22%, list=15%, signal=25%
KEGG_TGF_BETA_SIGNALING_PATHWAY	KEGG_TGF_BETA_SIGNALING_PATHWAY		82	-0.209449	-0.880165	0.734127	0.670232	1	5542	tags=32%, list=27%, signal=43%
KEGG_LIMONENE_AND_PINENE_DEGRADATION	KEGG_LIMONENE_AND_PINENE_DEGRADATION		9	-0.36108	-0.875728	0.644764	0.672262	1	3354	tags=33%, list=16%, signal=40%
KEGG_PRION_DISEASES	KEGG_PRION_DISEASES		34	-0.262173	-0.867731	0.65362	0.680198	1	5084	tags=38%, list=24%, signal=51%
KEGG_GLYCOSAMINOGLYCAN_BIOSYNTHESIS_KERATAN_SULFATE	KEGG_GLYCOSAMINOGLYCAN_BIOSYNTHESIS_KERATAN_SULFATE		15	-0.298318	-0.865008	0.636546	0.679402	1	1590	tags=13%, list=8%, signal=14%
KEGG_TRYPTOPHAN_METABOLISM	KEGG_TRYPTOPHAN_METABOLISM		40	-0.232686	-0.852944	0.731557	0.693302	1	3914	tags=23%, list=19%, signal=28%
KEGG_VIRAL_MYOCARDITIS	KEGG_VIRAL_MYOCARDITIS		66	-0.24263	-0.851122	0.643299	0.691012	1	3798	tags=23%, list=18%, signal=28%
KEGG_RNA_POLYMERASE	KEGG_RNA_POLYMERASE		28	-0.305617	-0.833262	0.658537	0.714375	1	2927	tags=25%, list=14%, signal=29%
KEGG_PHENYLALANINE_METABOLISM	KEGG_PHENYLALANINE_METABOLISM		16	-0.293284	-0.832827	0.693548	0.709863	1	1384	tags=13%, list=7%, signal=13%
KEGG_BUTANOATE_METABOLISM	KEGG_BUTANOATE_METABOLISM		33	-0.257133	-0.804295	0.725773	0.750795	1	4511	tags=33%, list=22%, signal=42%
KEGG_ONE_CARBON_POOL_BY_FOLATE	KEGG_ONE_CARBON_POOL_BY_FOLATE		16	-0.292198	-0.800356	0.724138	0.751601	1	2031	tags=19%, list=10%, signal=21%
KEGG_COMPLEMENT_AND_COAGULATION_CASCADES	KEGG_COMPLEMENT_AND_COAGULATION_CASCADES		67	-0.256108	-0.771713	0.765049	0.789136	1	1378	tags=10%, list=7%, signal=11%
KEGG_DNA_REPLICATION	KEGG_DNA_REPLICATION		36	-0.312753	-0.765549	0.684647	0.792147	1	5255	tags=42%, list=25%, signal=56%
KEGG_CARDIAC_MUSCLE_CONTRACTION	KEGG_CARDIAC_MUSCLE_CONTRACTION		70	-0.199856	-0.747497	0.864542	0.811613	1	3891	tags=20%, list=19%, signal=25%
KEGG_ALPHA_LINOLENIC_ACID_METABOLISM	KEGG_ALPHA_LINOLENIC_ACID_METABOLISM		14	-0.274589	-0.730997	0.832335	0.828229	1	2139	tags=21%, list=10%, signal=24%
KEGG_MISMATCH_REPAIR	KEGG_MISMATCH_REPAIR		22	-0.287373	-0.724422	0.73251	0.831839	1	4936	tags=41%, list=24%, signal=54%
KEGG_HYPERTROPHIC_CARDIOMYOPATHY_HCM	KEGG_HYPERTROPHIC_CARDIOMYOPATHY_HCM		81	-0.191757	-0.689063	0.901639	0.869199	1	3235	tags=16%, list=16%, signal=19%
KEGG_AMINOACYL_TRNA_BIOSYNTHESIS	KEGG_AMINOACYL_TRNA_BIOSYNTHESIS		37	-0.251556	-0.633572	0.814346	0.917153	1	5098	tags=30%, list=24%, signal=39%
