# Supplementary material for: Identification of WIPI1 as A Potential Ferroptosis-Related Biomarker in Sepsis and Validation in CLP Mice Model.
Source: Research Square preprint supplement (doi:10.21203/rs.3.rs-1014586/v1), 2021-10-28
Supplement: Supplementary file 8 [file 64d7332f7f4037c9353c1305.xlsx]

## Sheet: Sheet1
	GSE13904		GSE26378
Gene.symbol	adj.P.Val	logFC	adj.P.Val	logFC
PGD	2.42e-14	2.31536	1.71e-17	2.71509
CYBB	4.71e-05	1.01849	1.04e-09	1.38077
CD44	0.000404	1.08796	2.84e-08	0.973524
AKR1C3	0.000119	-0.99983	0.0338	-0.62524
ULK2	0.000374	-0.515817	5.47e-05	-0.662141
TLR4	0.00219	0.771483	9.55e-06	1.10164
KRAS	0.0027	0.642714	0.015	0.683398
TUBE1	0.000286	-1.03248	0.0146	-0.767008
MAP3K5	1.93e-05	0.947351	0.000139	0.68517
WIPI1	8.19e-07	1.3507	4.21e-10	1.50684
PEBP1	1.4e-06	-1.08749	7.33e-08	-1.19817
TNFAIP3	0.0139	0.656621	0.0319	0.52456
ATG5	0.00994	0.553411	0.00913	0.594827
STAT3	1.83e-08	1.04231	1.13e-07	0.876995
ATG7	5.79e-10	1.1147	5.31e-08	0.923332
MAPK1	5.05e-08	0.905257	5.19e-09	0.894497
BID	0.00119	0.825343	6.06e-05	0.689091
CAPG	3.69e-06	1.11391	5.29e-11	1.55392
EPAS1	3.26e-05	0.955108	0.00653	0.646225
MAPK14	4.67e-11	2.0768	9.51e-17	2.38348
ACVR1B	5.53e-09	1.09983	3.1e-10	1.25072
SLC2A3	5.75e-14	2.05529	5.37e-18	2.37582
SLC40A1	4.4e-07	0.776426	4.39e-08	1.17916
LPIN1	7.13e-08	-1.1239	1.7e-07	-1.01006
HMOX1	0.00482	0.668629	8.88e-05	0.851586
MAFG	7.67e-12	1.11745	2.4e-13	1.47117
IDH1	0.000323	0.922737	1.36e-09	1.1834
JDP2	2.55e-07	1.22443	2.26e-09	1.2117
ACSL4	0.000182	0.669565	1.15e-05	1.47264
NCF2	0.000188	0.788353	6.13e-06	0.798309
ZFP36	0.000149	0.633401	8.42e-05	0.679283
SLC7A5	0.0134	0.681681	0.00329	0.737174
DUSP1	0.00273	0.640415	5.19e-05	0.775954
G6PD	9.91e-07	1.24312	1.75e-06	1.04515
ZEB1	0.000383	-0.860156	0.0234	-0.551896
CBS	5.47e-05	0.623471	0.000448	0.571759
SAT1	1.43e-05	0.865245	5.37e-08	1.00257
MAPK8	3.24e-07	-0.844891	8.19e-07	-0.781511
SIRT1	0.000283	-0.845869	0.0253	-0.512149
DPP4	0.000738	-0.756498	4.86e-07	-0.974083
FBXW7	0.00679	-0.617622	0.025	-0.517512
ZNF419	2.21e-06	-0.525996	2.97e-07	-0.700034
SLC38A1	8.07e-07	-1.7234	4.6e-07	-1.38996
LAMP2	0.0014	1.00004	0.00341	0.687237
KLHL24	0.0109	-0.722982	0.00522	-0.63457
FLT3	0.000312	0.672199	0.0126	0.603287
TXNRD1	0.00809	0.50671	3.03e-05	0.634576
ALOX5	2.92e-07	1.57141	1.53e-10	1.84285
ARRDC3	0.00666	-0.840641	0.00257	-0.903154
ATM	4.31e-08	-1.40025	1.64e-06	-1.27125
GABARAPL2	0.00287	0.562704	3.65e-06	0.732294
SESN2	1.45e-05	0.643716	3.28e-06	0.793976
